# Supplementary material
Source: PubMed Central journal article supplement (PMC4512306)
Supplement: NIHMS660789-supplement-1.pdf [file NIHMS660789-supplement-1.pdf]

# ChromImpute Workflow

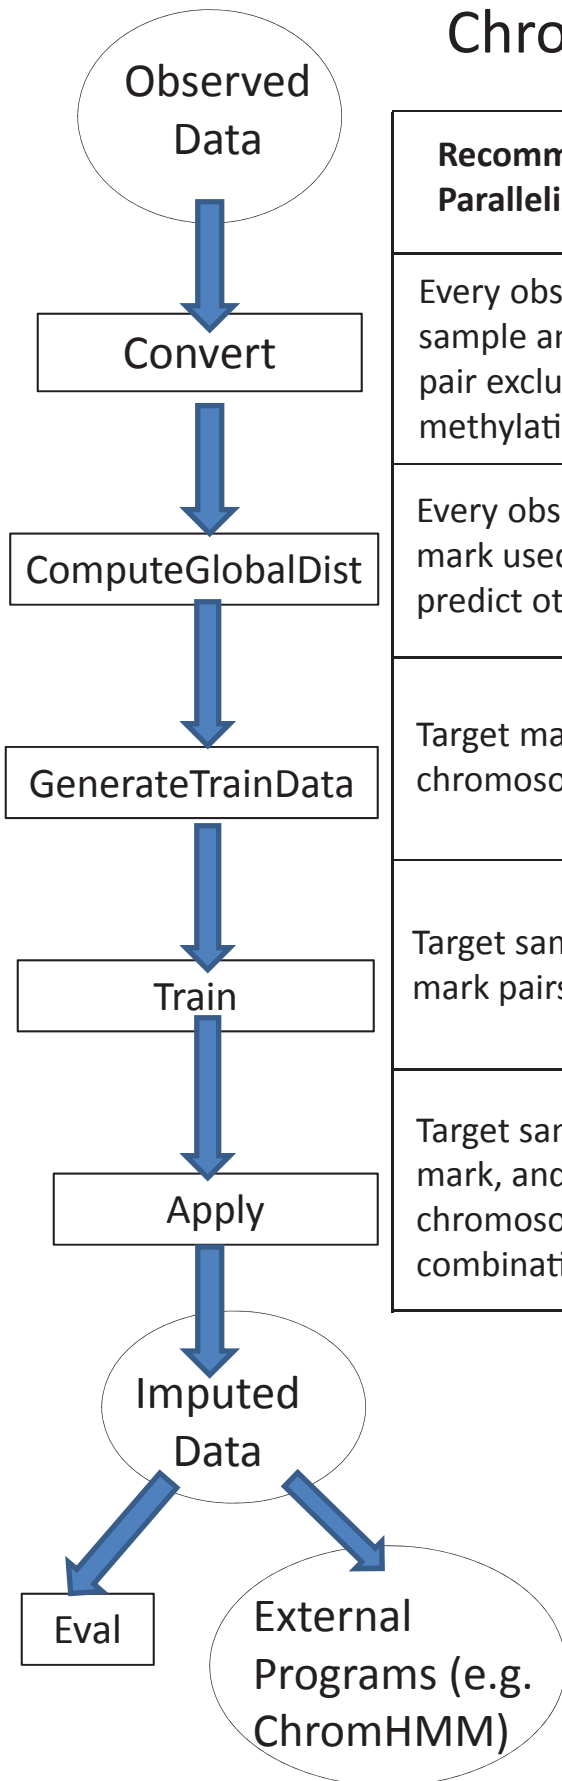

| Recommended Parallelization                                   | Number of Jobs | Approximate CPU time for hardest jobs | Approximate CPU time for average job |
|---------------------------------------------------------------|----------------|---------------------------------------|--------------------------------------|
| Every observed sample and mark pair excluding DNA-methylation | 1088           | 10min                                 | 10min                                |
| Every observed mark used to predict other marks               | 32             | 2hr                                   | 1hr                                  |
| Target mark and chromosome                                    | 782            | 2hr                                   | 1hr                                  |
| Target sample and mark pairs                                  | 4315           | 4hr                                   | 1hr                                  |
| Target sample, mark, and chromosome combinations              | 99245          | 3hr                                   | 1hr                                  |

## Supplementary Figure 1: Workflow of ChromImpute.

On left is a flow chart illustrating the various steps to generate the imputed data using the ChromImpute software. First the observed data is converted into the desired target resolution. Second a global distance for each mark between all pairs of samples is computed based on correlation. Third the training data is generated. Fourth the regression predictors are trained. Finally the regression predictors can be applied to generate imputed data for which additional analysis can be conducted. On the right is a recommended parallelization strategy for each command, and then for the imputation application considered here the number of compute jobs that would lead to and the approximate maximum and average CPU time for each job.

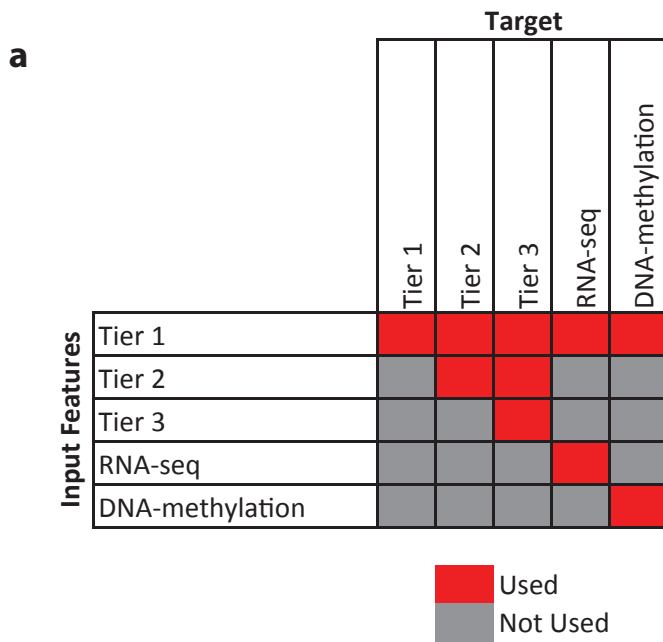

**b**

| Tier | Marks                                                                                                                                                                                  | # of Marks | # Samples Represented | Min # Samples Per Mark | Max # of Samples Per Mark | Average # of Samples Per Mark | Total # of Observed Datasets | Total # of Imputed Datasets | Tiers of Other Marks Used in Primary Imputation |
|------|----------------------------------------------------------------------------------------------------------------------------------------------------------------------------------------|------------|-----------------------|------------------------|---------------------------|-------------------------------|------------------------------|-----------------------------|-------------------------------------------------|
| 1    | DNase, H3K27ac, H3K27me3, H3K36me3, H3K4me1, H3K4me3, H3K9ac, H3K9me3                                                                                                                  | 8          | 127                   | 53                     | 127                       | 106                           | 848                          | 1016                        | 1                                               |
| 2    | H2A.Z, H3K4me2, H3K79me2, H4K20me1                                                                                                                                                     | 4          | 26                    | 19                     | 23                        | 21.75                         | 87                           | 508                         | 1,2                                             |
| 3    | H2AK5ac, H2AK9ac, H2BK120ac, H2BK12ac, H2BK15ac, H2BK20ac, H2BK5ac, H3K14ac, H3K18ac, H3K23ac, H3K23me2, H3K4ac, H3K56ac, H3K79me1, H3K9me1, H3T11ph, H4K5ac, H4K8ac, H4K12ac, H4K91ac | 20         | 10                    | 1                      | 7                         | 4.85                          | 97                           | 2537                        | 1,2,3                                           |
|      | DNA Methylation                                                                                                                                                                        | 1          | 37                    | 37                     | 56                        | 37                            | 37                           | 127                         | 1                                               |
|      | RNA-seq                                                                                                                                                                                | 1          | 56                    | 56                     | 56                        | 56                            | 56                           | 127                         | 1                                               |

**Supplementary Figure 2: Relationship between Mark Tiers for the Main Imputation.**

**(a)** The rows of the matrix correspond to subsets of marks for input defined in **b**, and the columns the set of target marks. A cell in the matrix is colored red if the corresponding set of marks of the row is used to predict the set of marks of the column for the main imputation. **(b)** The table reports statistics on the different tiers of marks as used for the primary imputation.

a

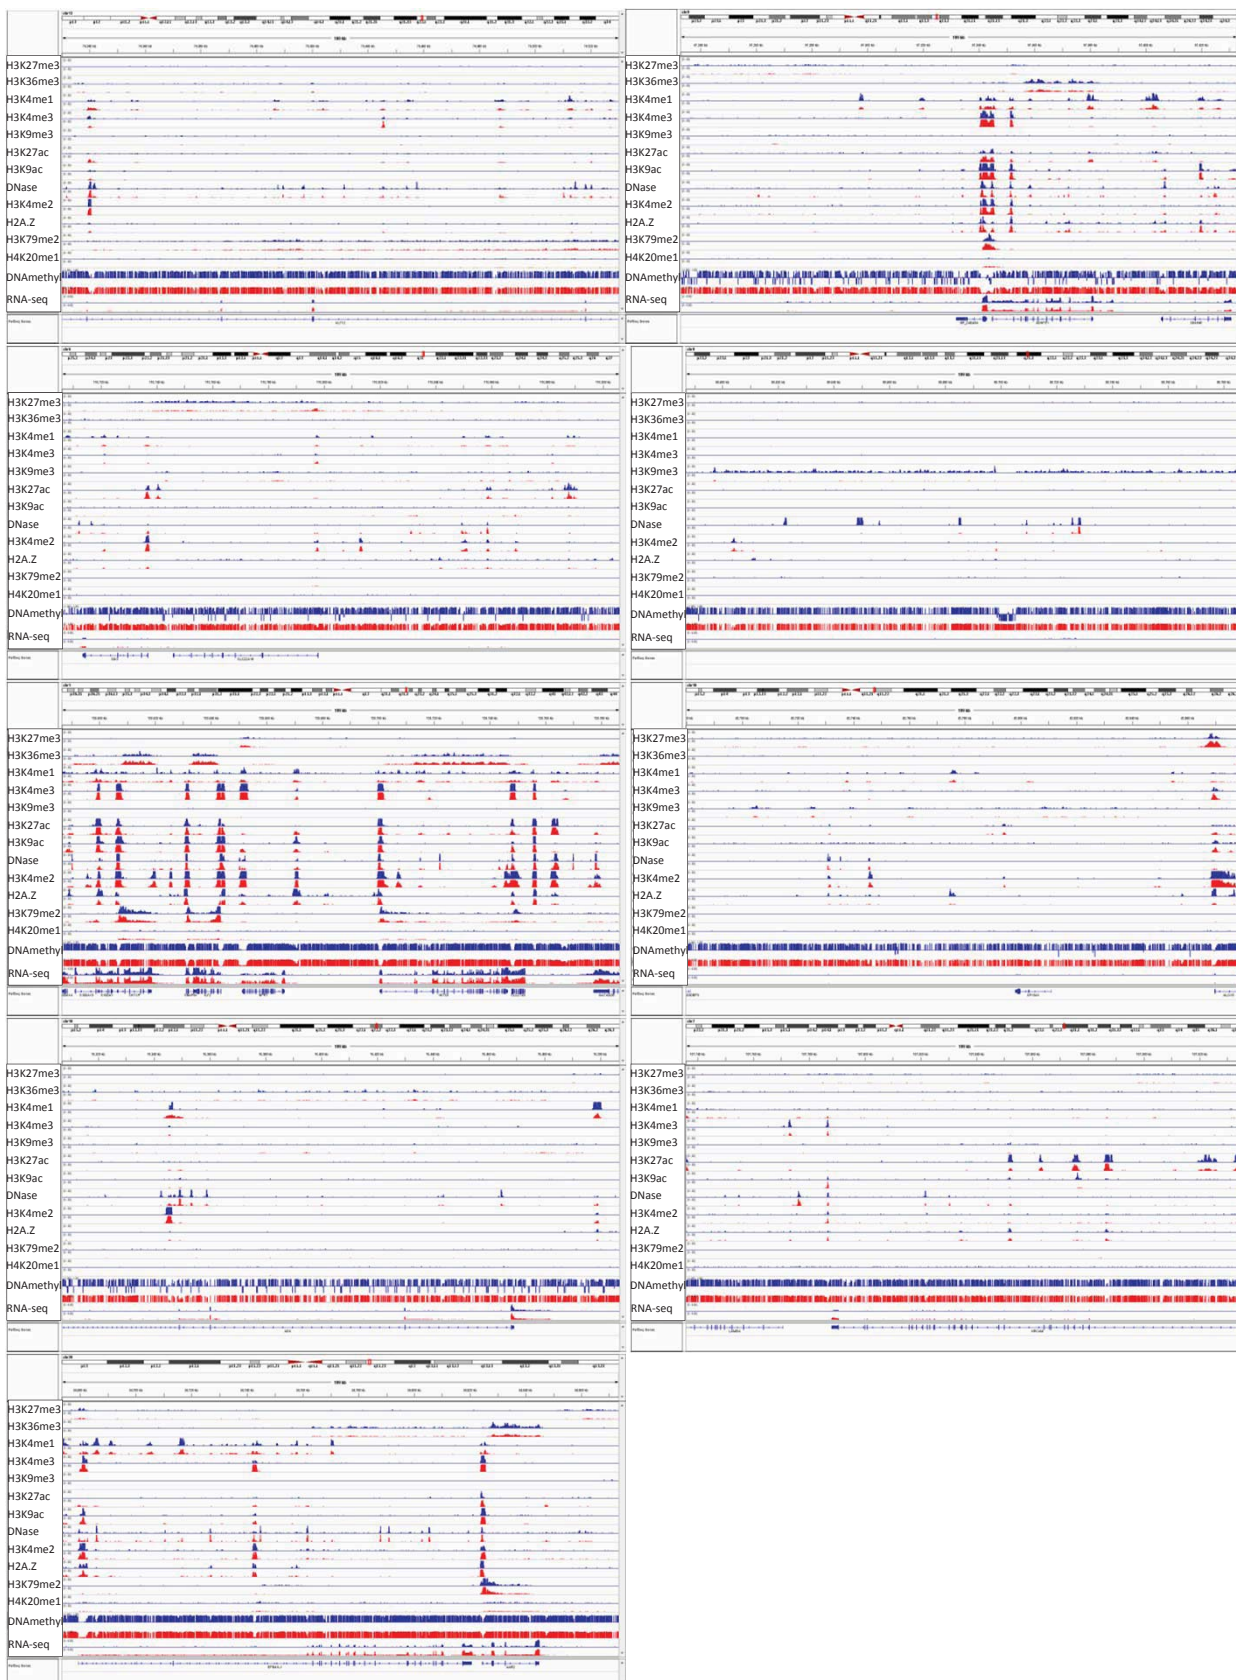

Supplementary Figure 3: Browser Images for Random Loci

(a) The figure shows browser screenshots for all Tier 1,2 marks, DNA-methylation, and RNA-seq at nine randomly selected 200kb loci of which the one with the most signal is also shown in Fig. 2. In blue is the signal for a randomly selected observed track for the mark and below it in red is the corresponding imputed track. DNA methylation values below the horizontal line correspond to missing values. (b) The same as shown in a, but for the Tier-3 marks. (c) Larger 1.5Mb context, and example 5kb close-up also shown for the randomly selected loci with the most signal associated with it. In the bottom set of tracks, note the dip in the nucleosome-free region of the ILF2 gene promoter, and the nucleotide-level concordance in CpG methylation information.

b

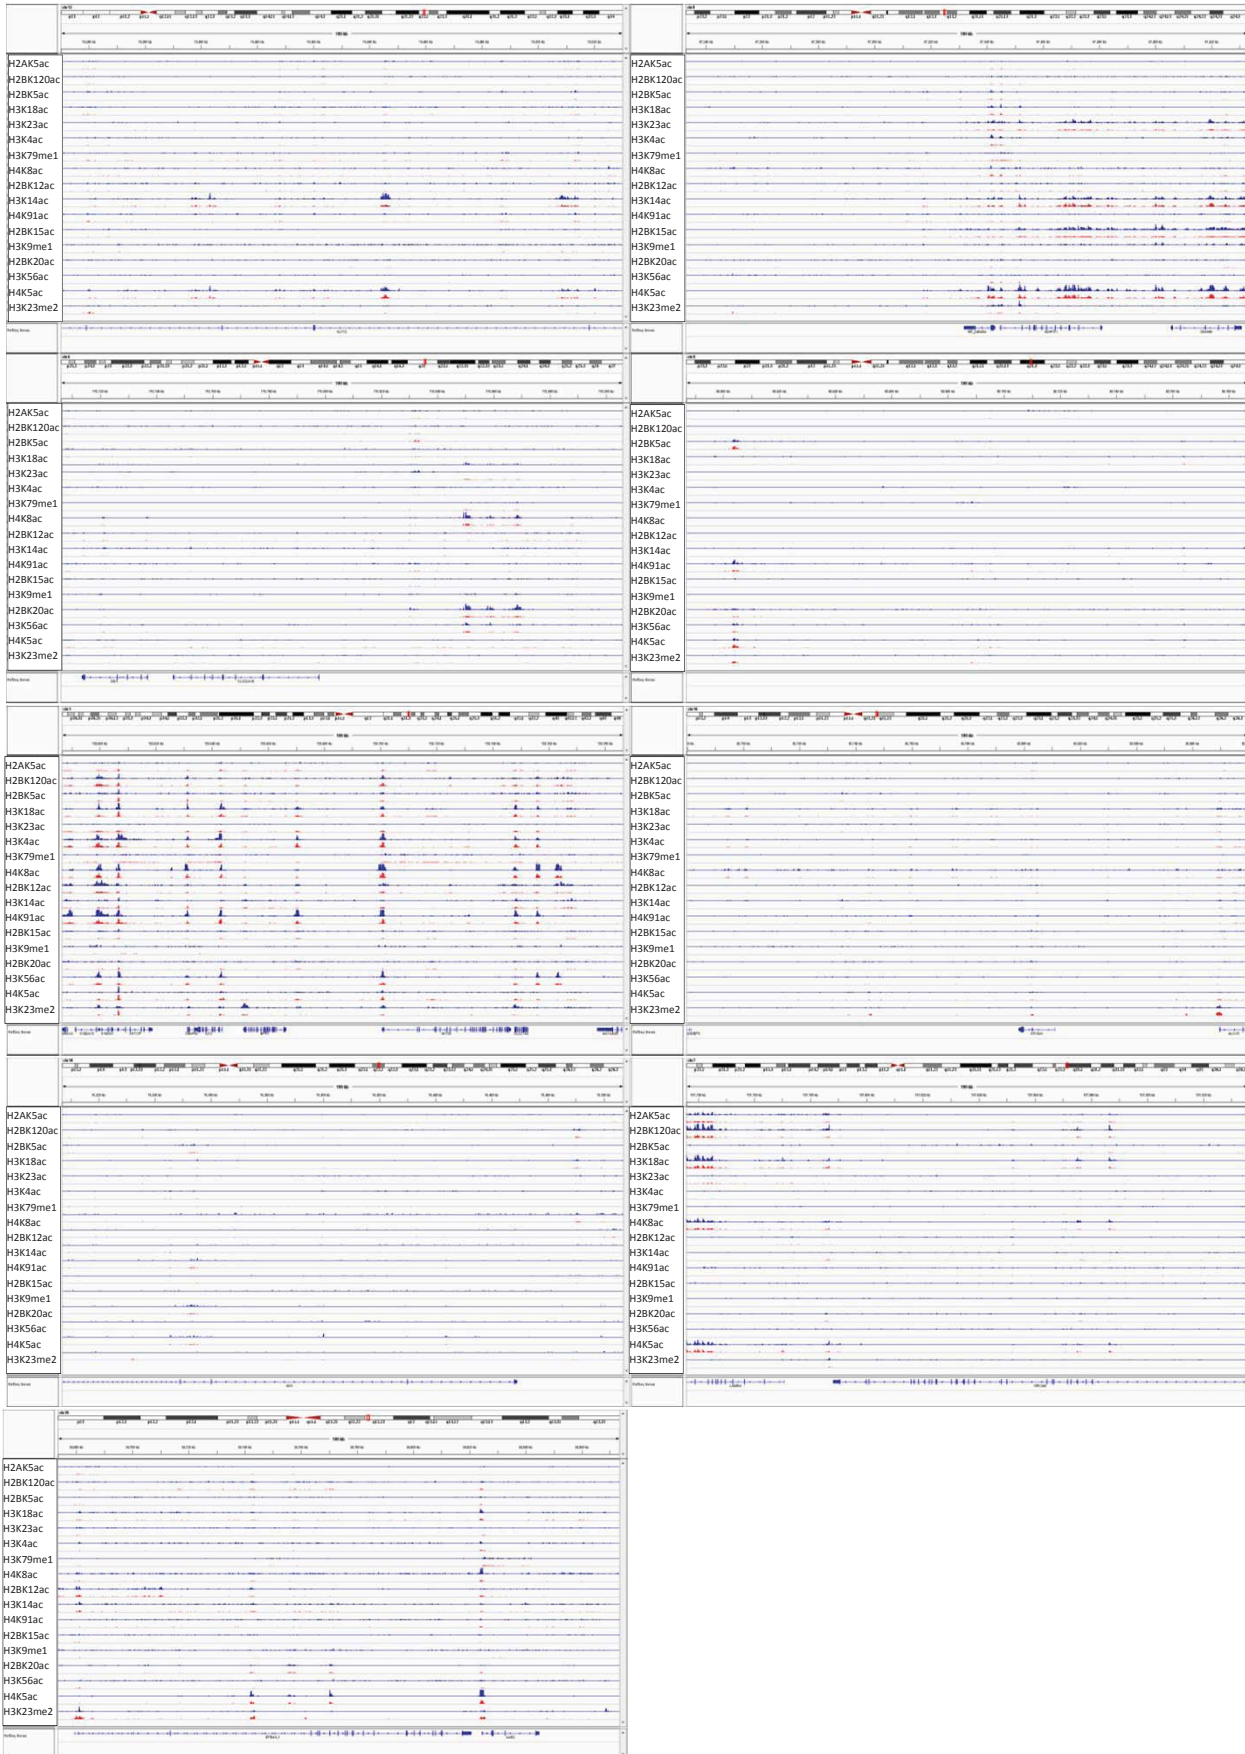



C.

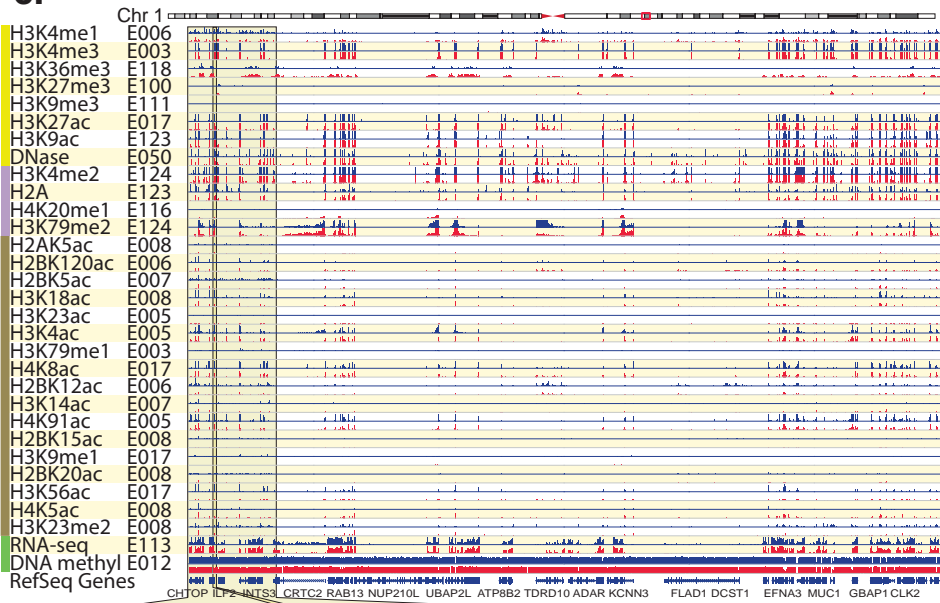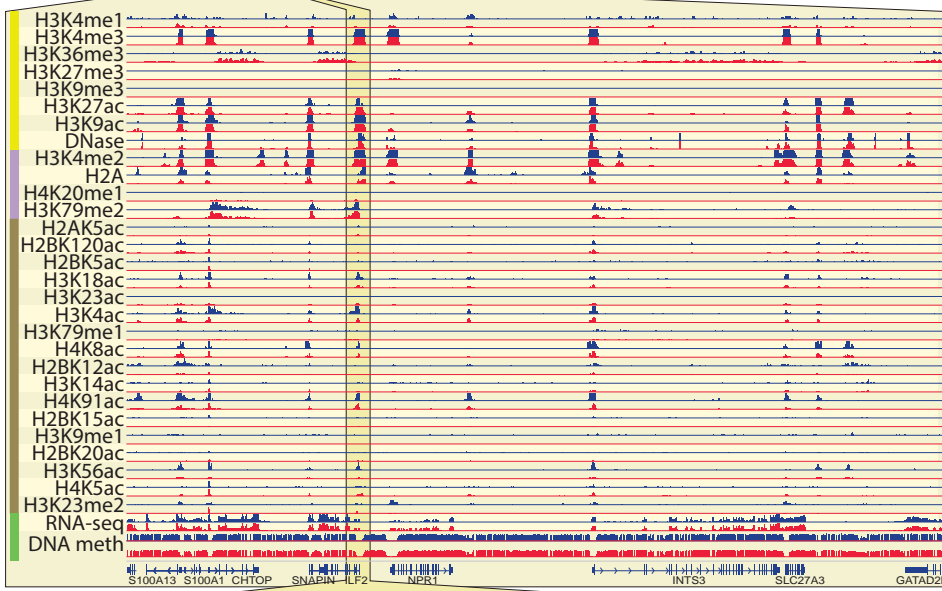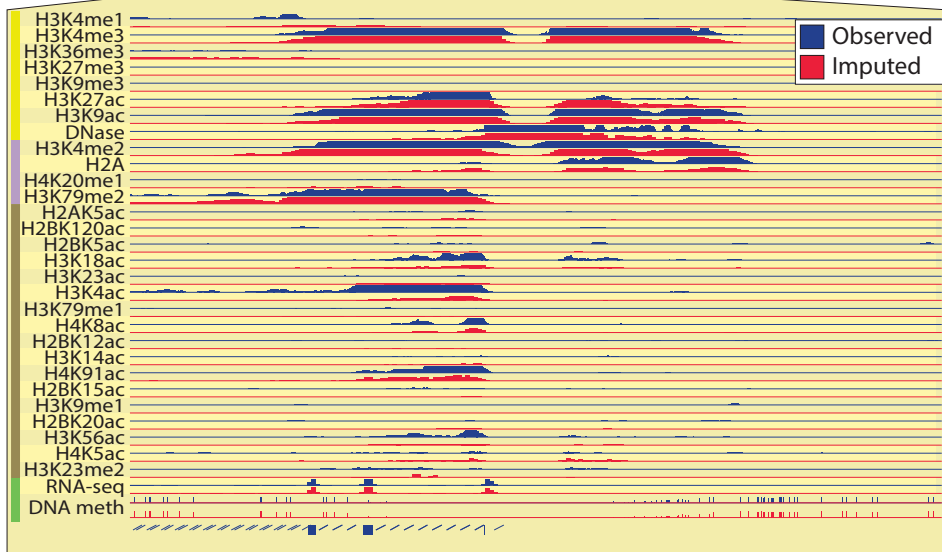

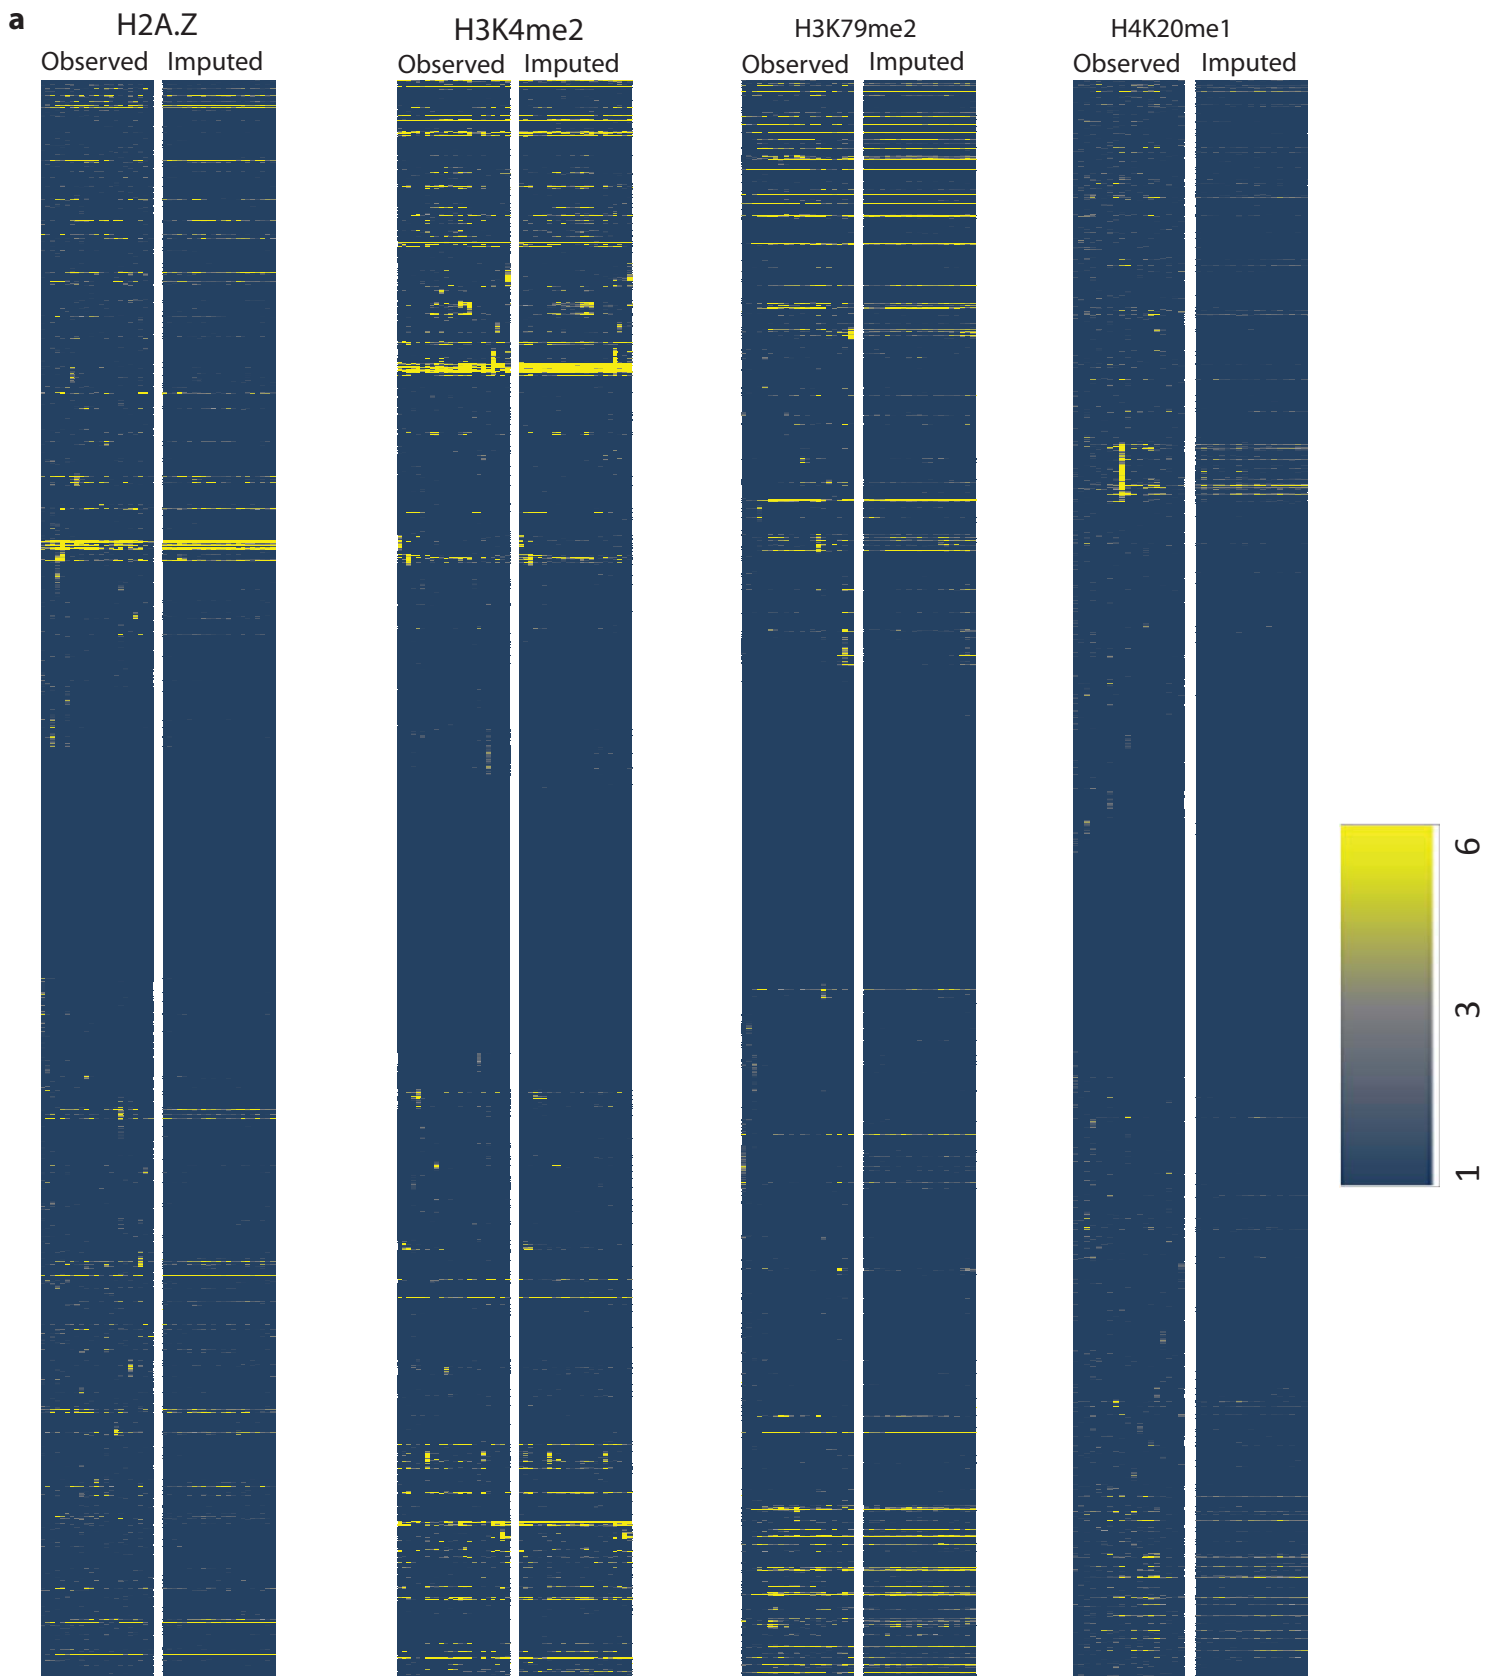

**Supplementary Figure 4:**

**Heatmap of Clustering of Signal at Randomly Selected Positions for Tier-2 and Tier-3 Marks.**

Similar heatmaps to those in **Fig. 2b**. The individual columns correspond to samples and the rows correspond to 2,000 randomly selected 25bp intervals that were clustered based on the observed data (left) with the corresponding imputed data also shown (right) for **(a)** Tier-2 marks and **(b)** Tier-3 marks. Only samples for which observed data is available are shown. The coloring corresponds to the signal level as indicated in the legend. Visually the heatmap show an overall agreement though some differences associated with outlier data sets or highly cell type specific behavior can also be seen.

**b**

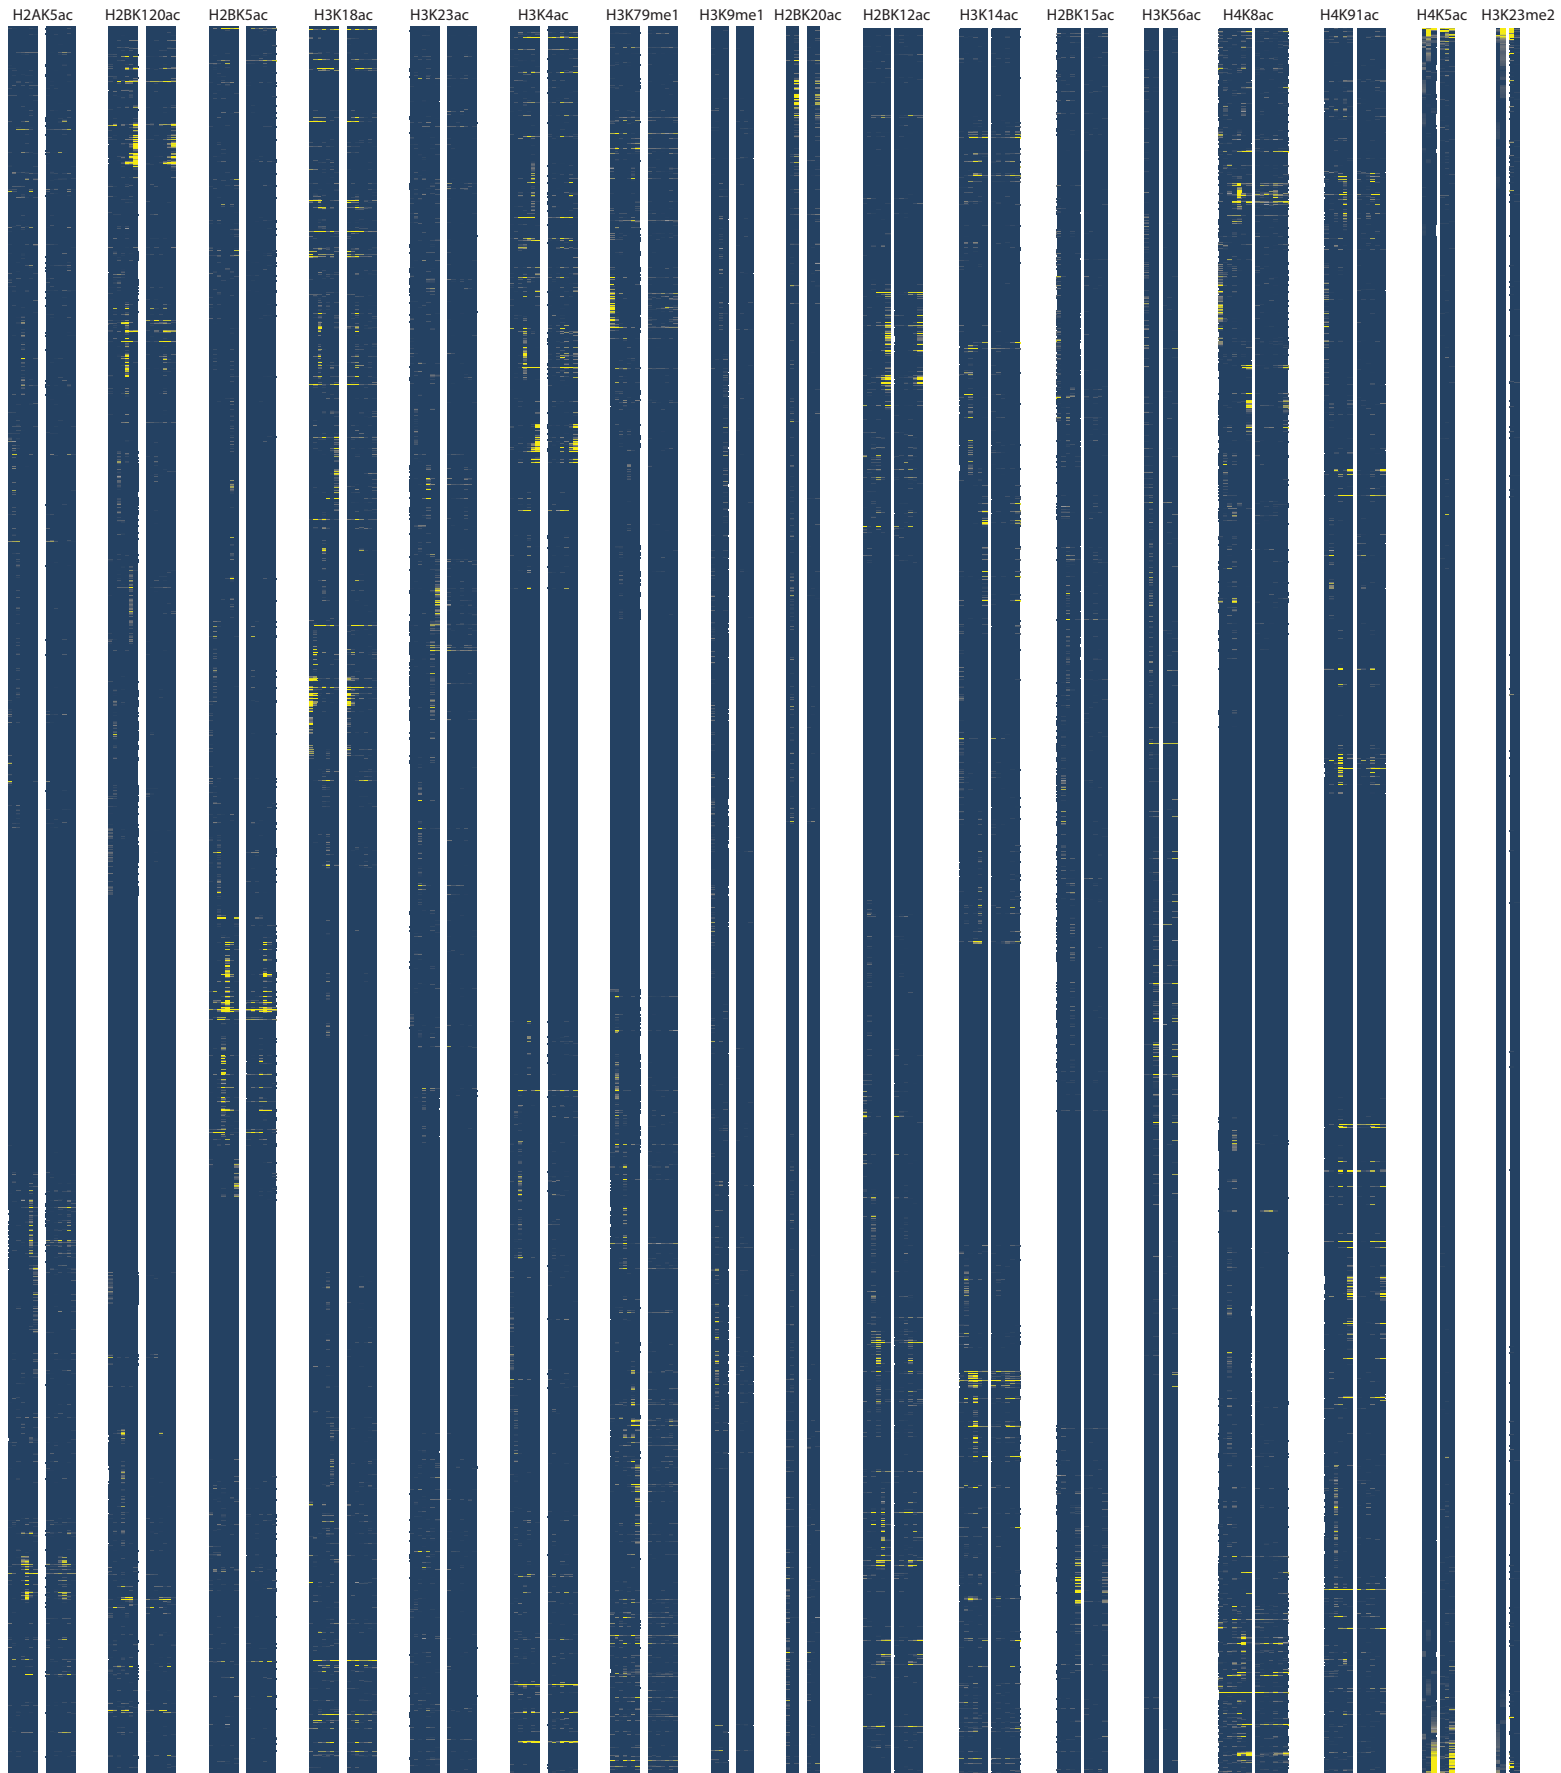





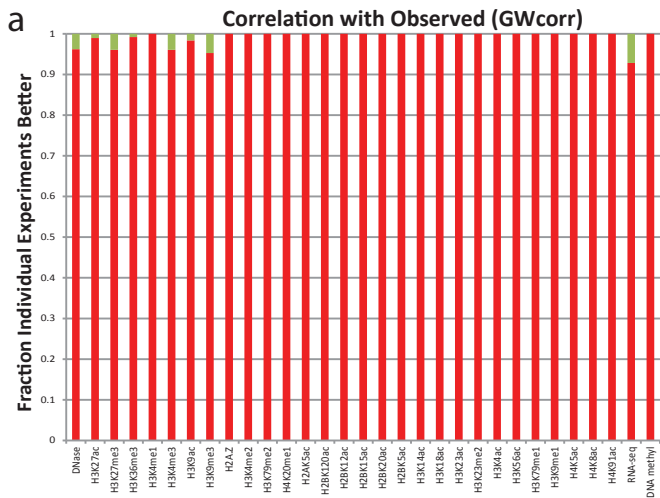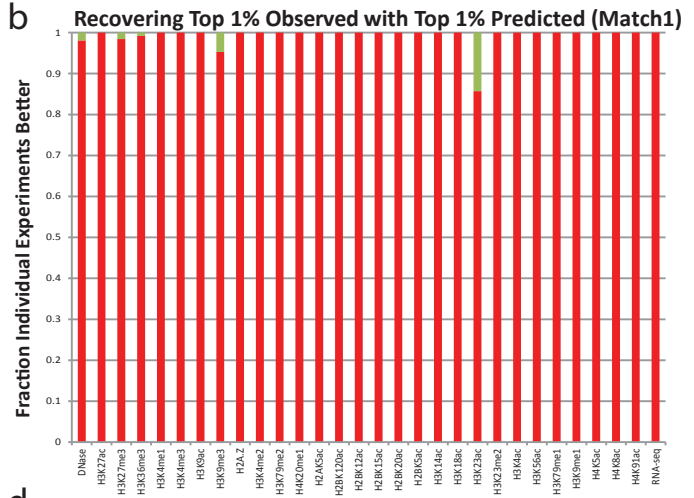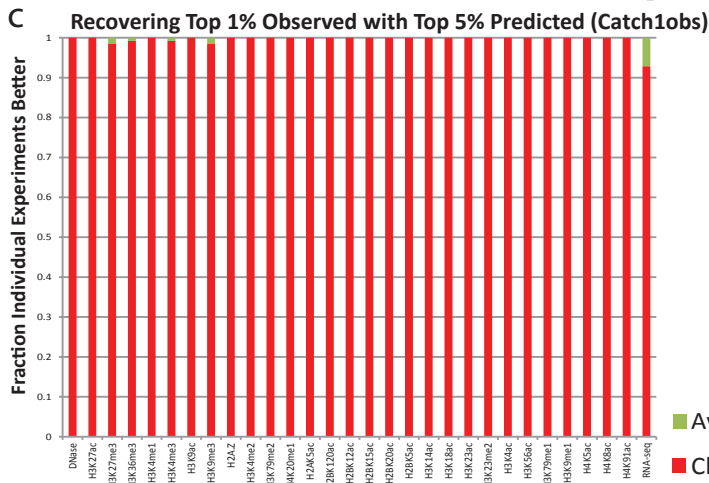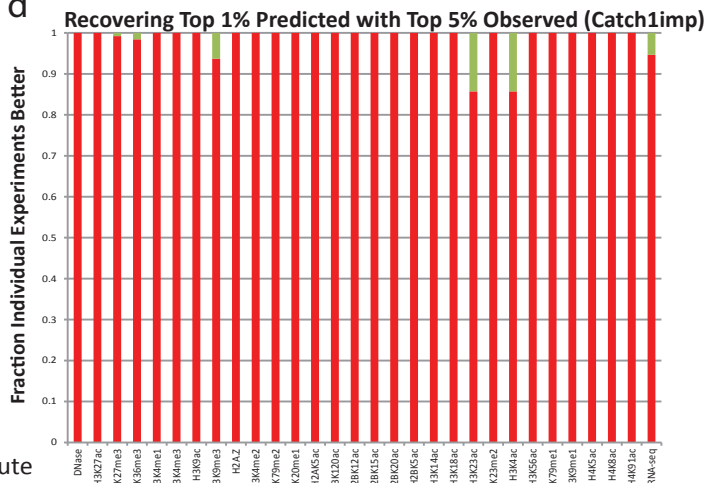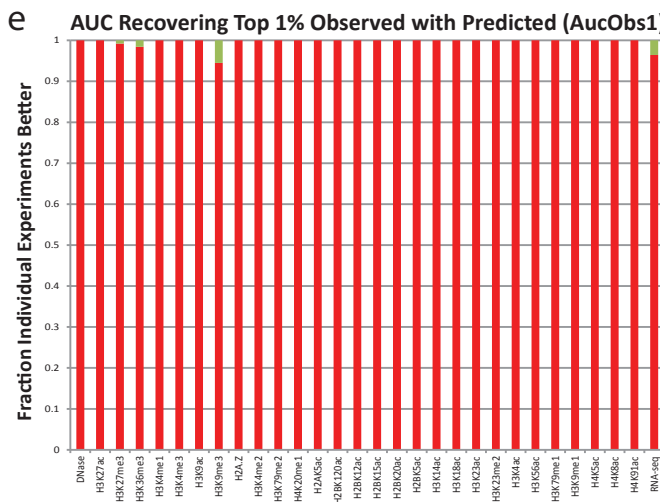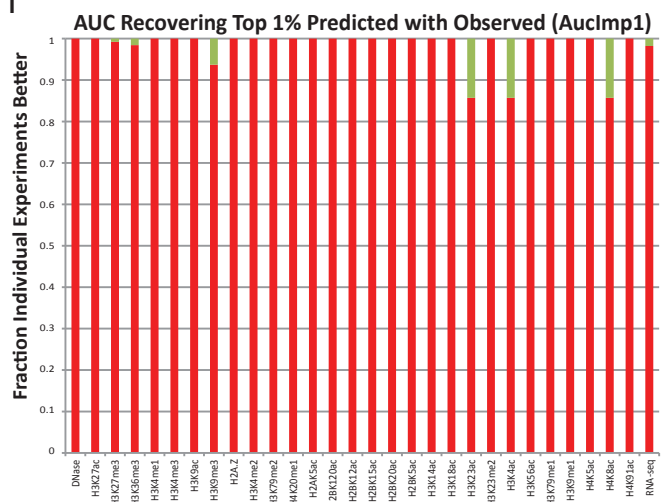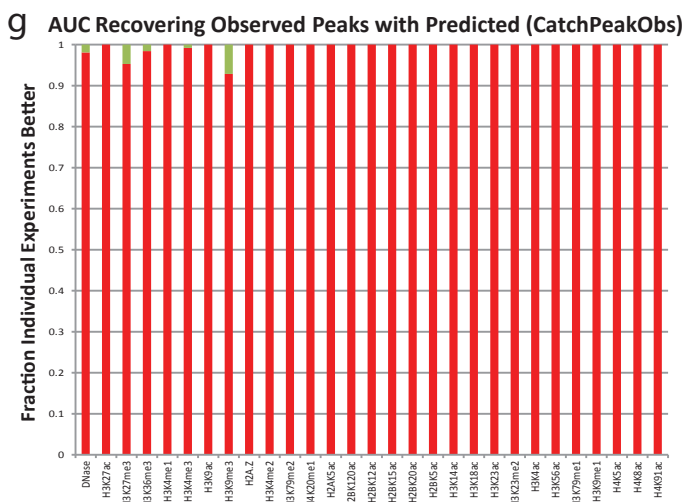

**Supplementary Figure 6:**

**Individual Experiment Comparison with Average Signal.**

The figure shows for each mark the fraction of individual experiments for which the ChromImpute predicted data better agrees with the observed data than the stringent baseline of the average signal of the mark in other samples. The comparison of ChromImpute against averaging the signal was done based on **(a)** Pearson correlation, **(b)** agreement for recovering locations of top 1% observed signal with top 1% predicted, **(c)** agreement for recovering top 1% observed signal with top 5% predicted, **(d)** agreement for recovering top 1% predicted with top 5% observed signal **(e)** AUC for recovering top 1% observed with predicted, **(f)** AUC for recovering top 1% predicted with observed, and **(g)** AUC for recovering bases covered by a narrow peak calls on observed data with predicted signal.

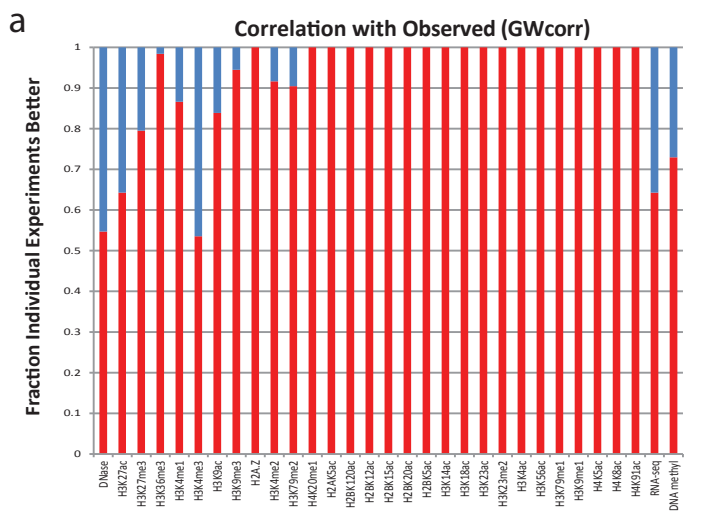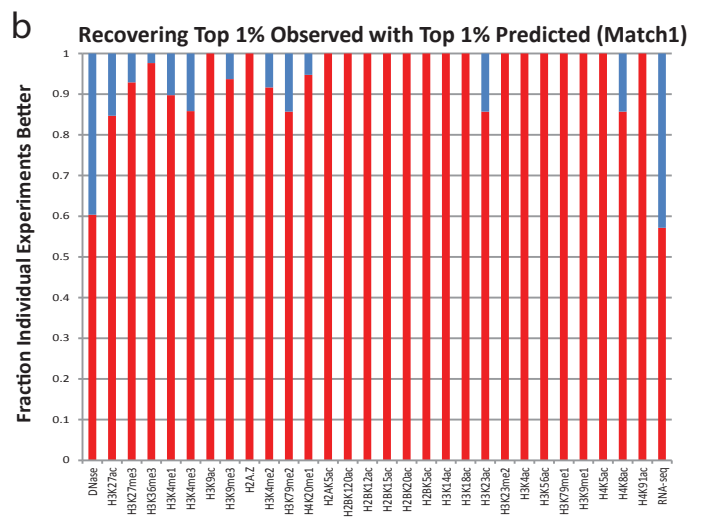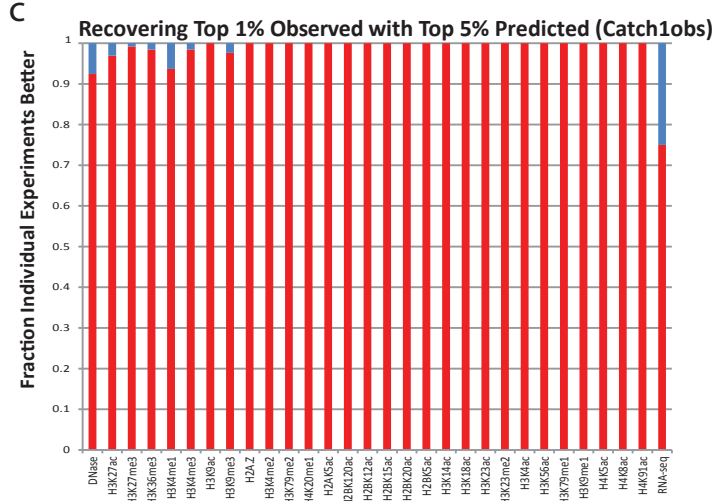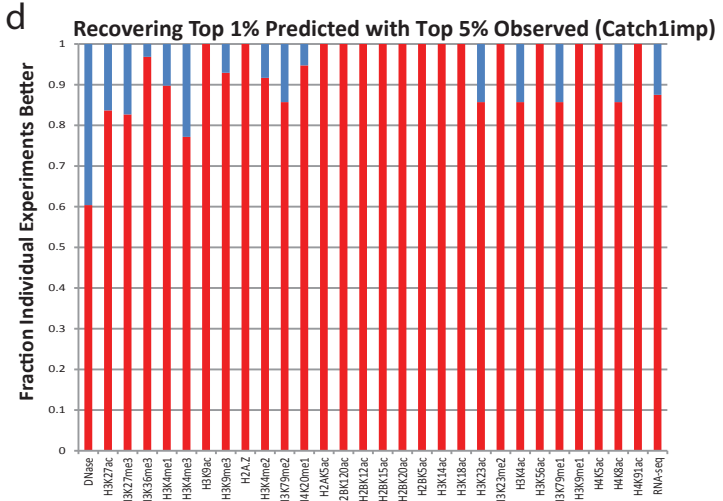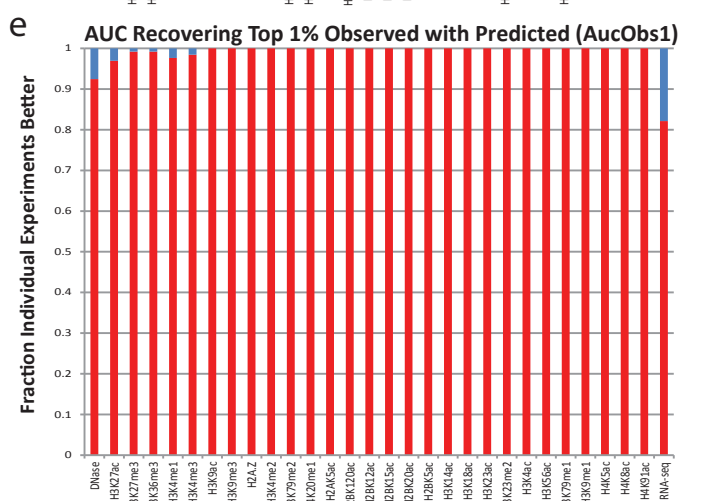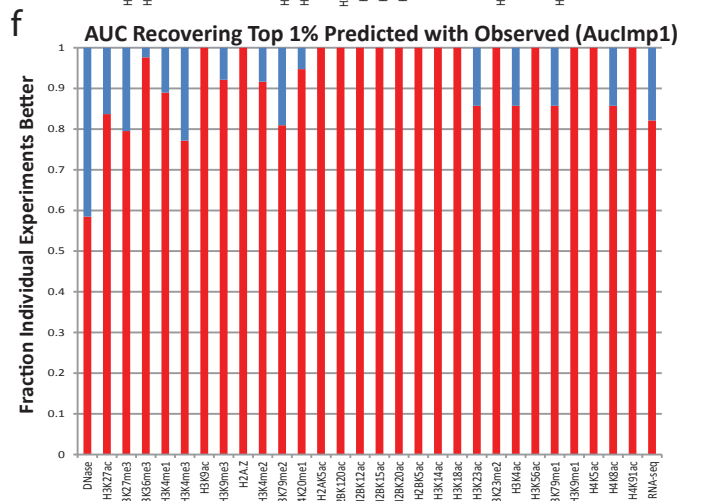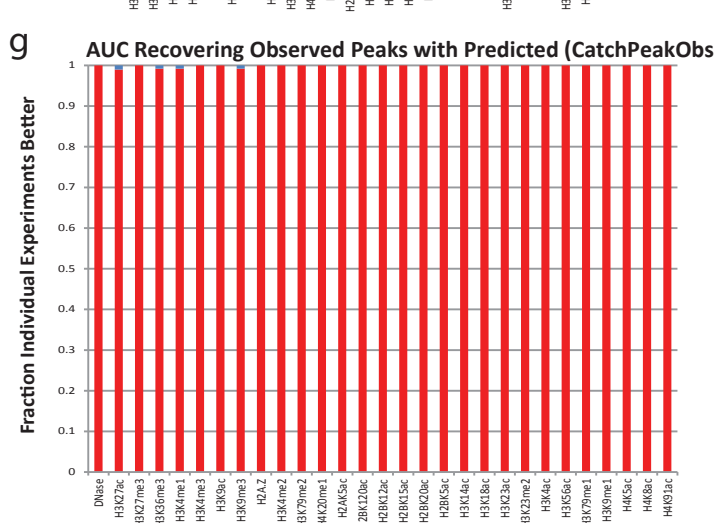

■ Best Case Single Epigenome  
■ ChromImpute

**Supplementary Figure 7:**  
**Individual Experiment Comparison with Best Case Single**  
 The same comparisons as in Fig. S6 except comparing ChromImpute to the stringent baseline of the best case when selecting a single sample of the mark for the comparison.

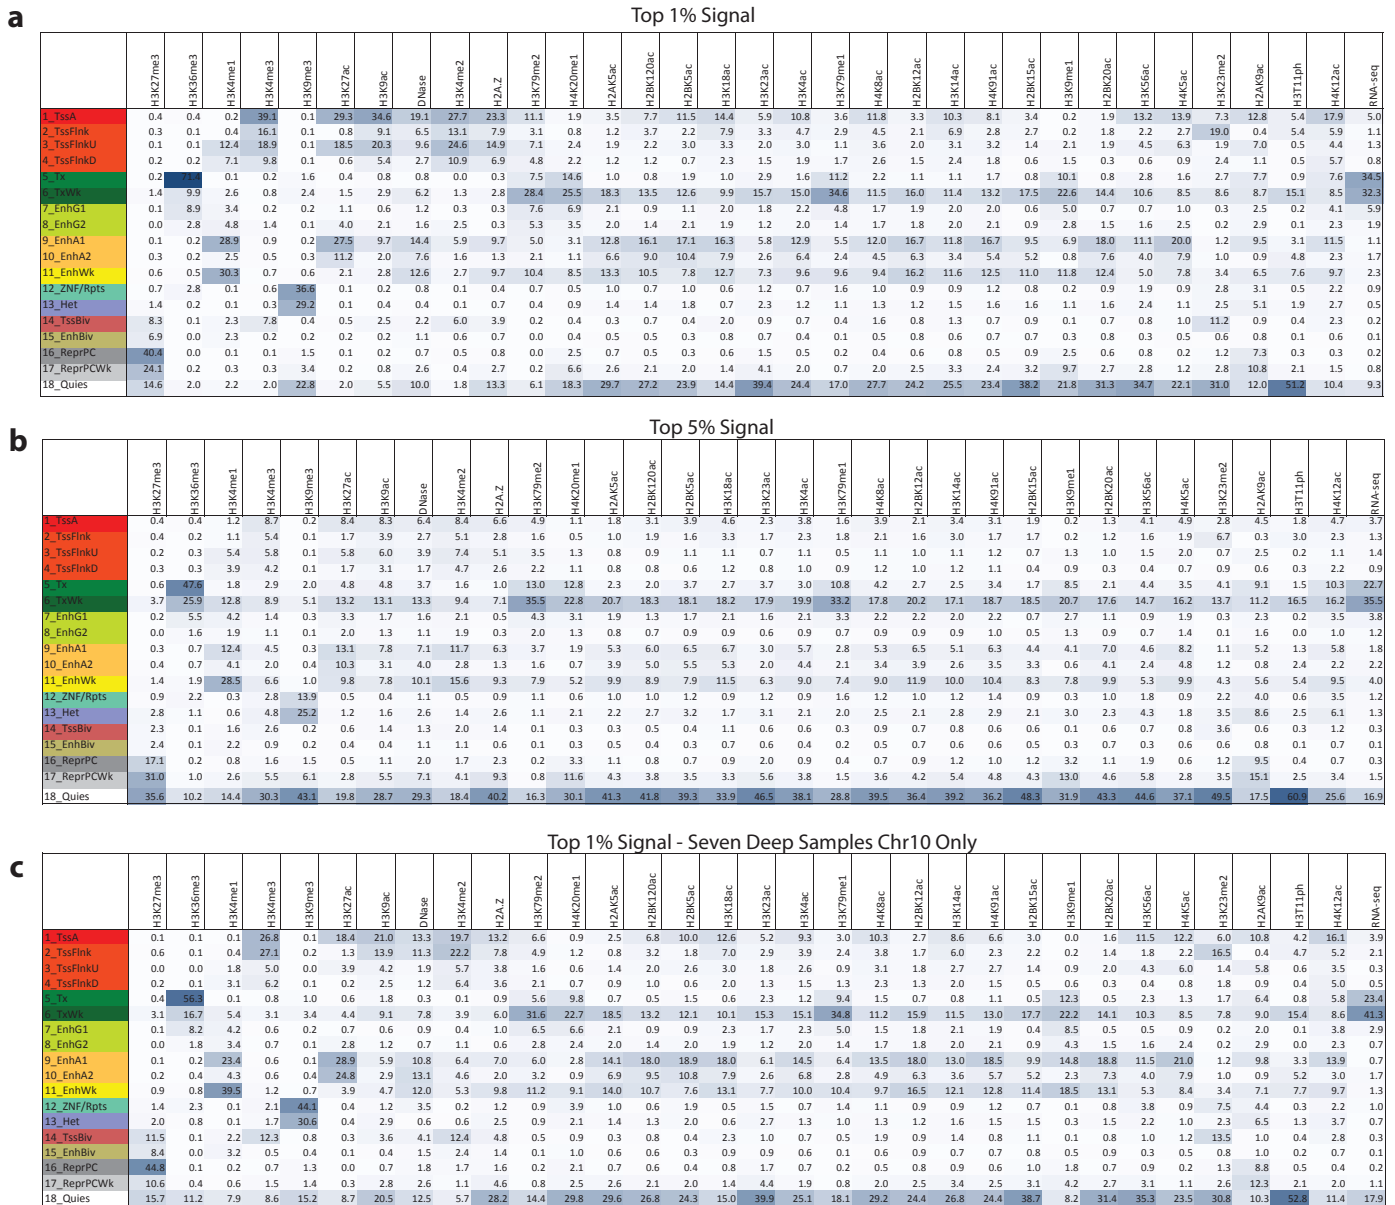

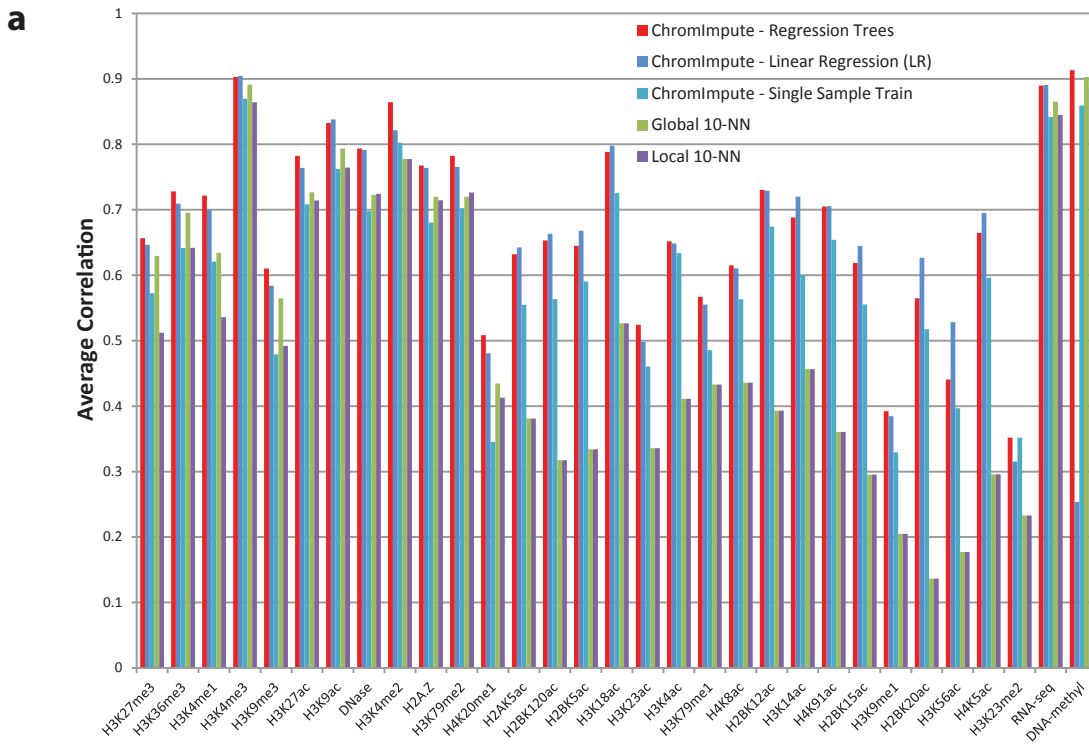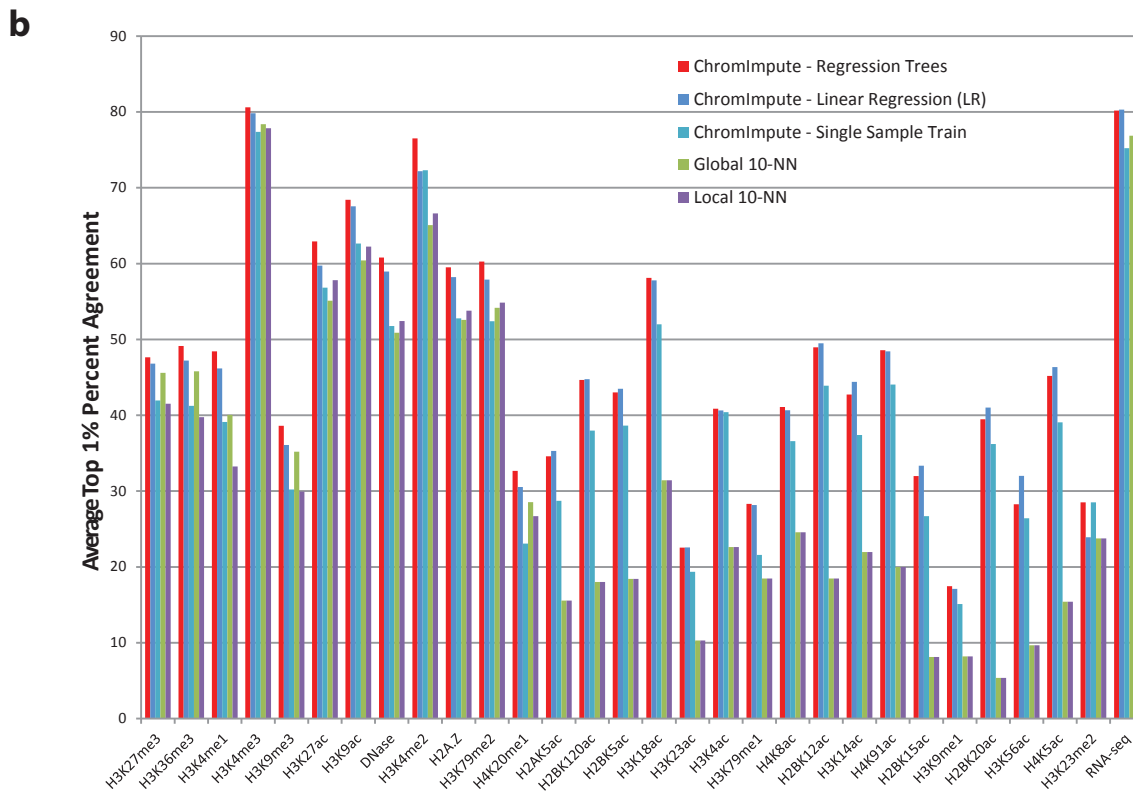

**Supplementary Figure 9: Methodological Comparisons.**

The graphs show a comparison based on **(a)** Correlation and **(b)** Top 1% agreement metrics for: (1) the standard ChromImpute which is based on an ensemble of regression trees, (2) ChromImpute with the same features and ensemble training strategy except using linear regression opposed to regression trees, (3) ChromImpute with regression trees trained on only on a single sample which was chosen to be the globally most correlated based on H3K4me1, except using H3K4me3 when training for H3K4me1. (4) Predictions based on averaging the target mark in up to the 10 nearest-neighboring samples having the target mark where the distance is determined based on the global correlation distance measure with H3K4me1, except using H3K4me3 when trying to predict H3K4me1. (5) The same as in (4) except using the local Euclidean distance opposed to the global correlation. Evaluation was limited to chr10.



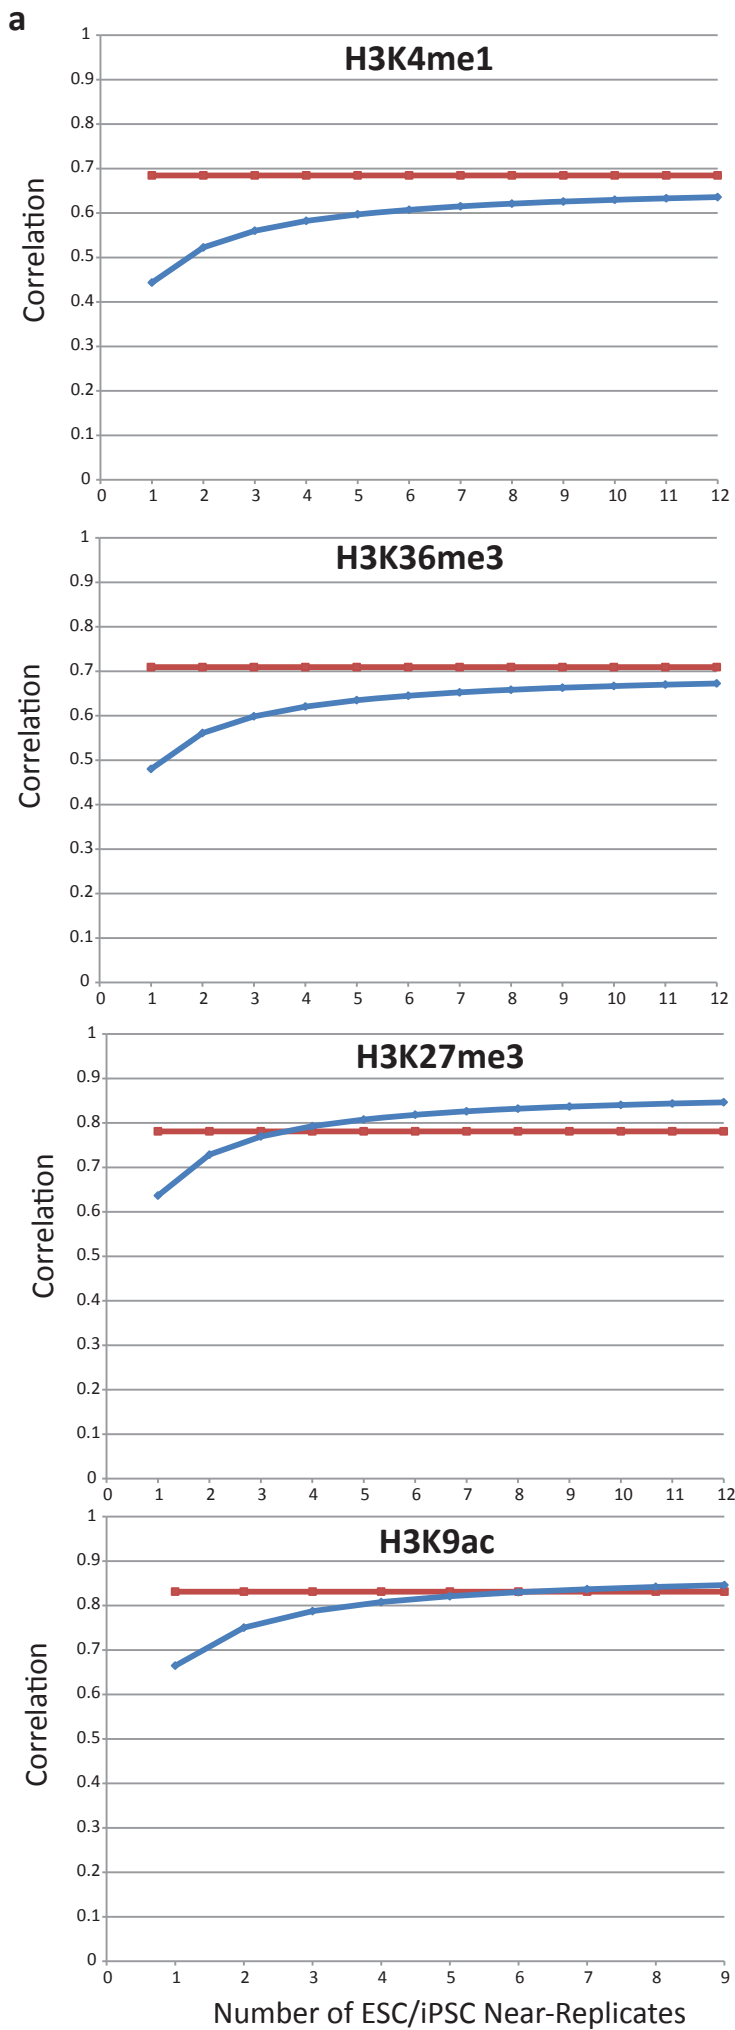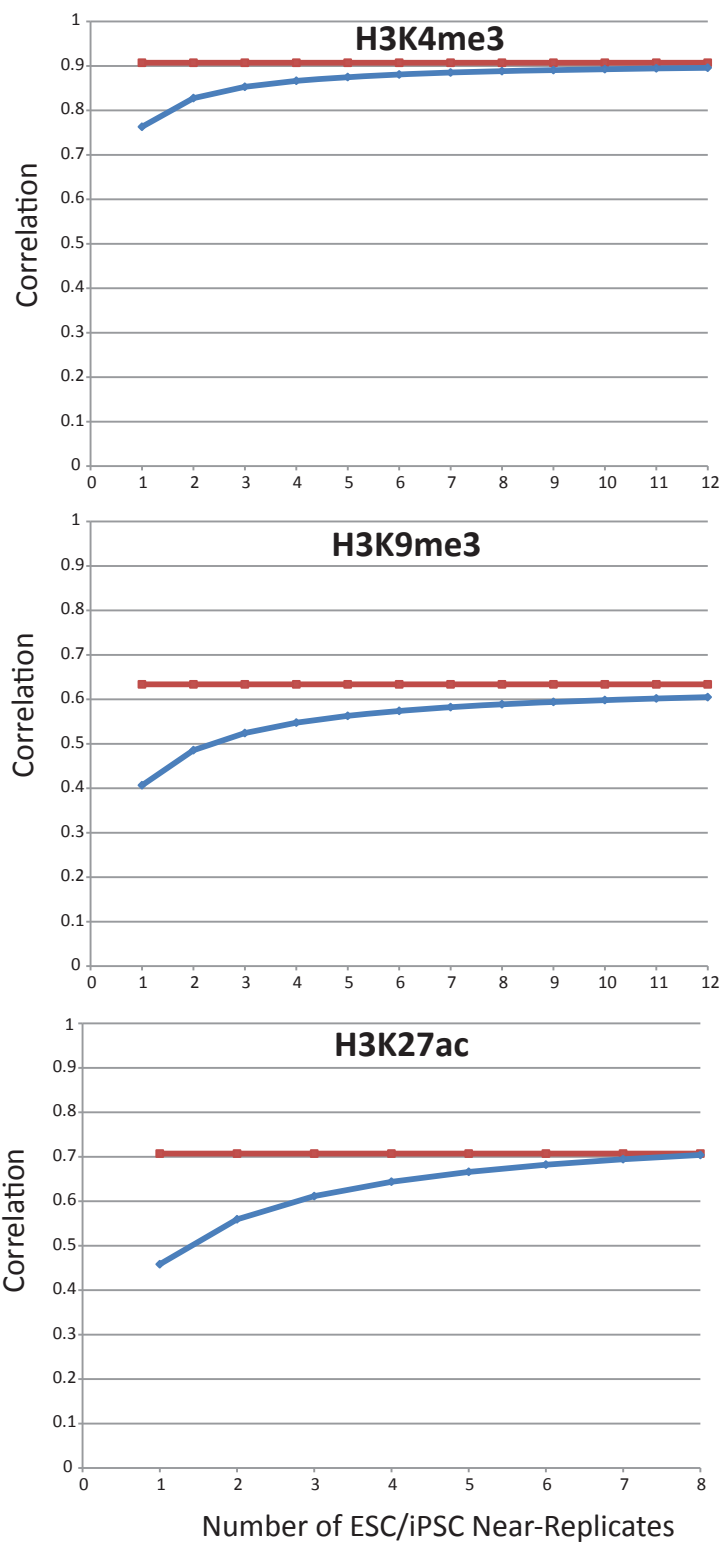

■ Imputed  
◆ ESC/iPSC Near-Replicates

**Supplementary Figure 10:**

**Comparison of Imputed Data and ES/iPSC Near-Replicate Predictions.**

The figures show for the tier 1 histone marks a comparison of the performance of the imputed data on average for ESC and iPSC samples compared with what would be expected by treating the other ESC and iPSC samples as effective replicates and averaging their values as a function of the number of replicates in terms of (a) correlation and (b) top 1% agreement. To compute the expectation for k-replicates for each 25-bp interval we randomly selected k of the ESC and iPSC samples which had the mark mapped excluding the sample being evaluated. The performance of the imputed data in comparison is shown with the horizontal line in red.

**b**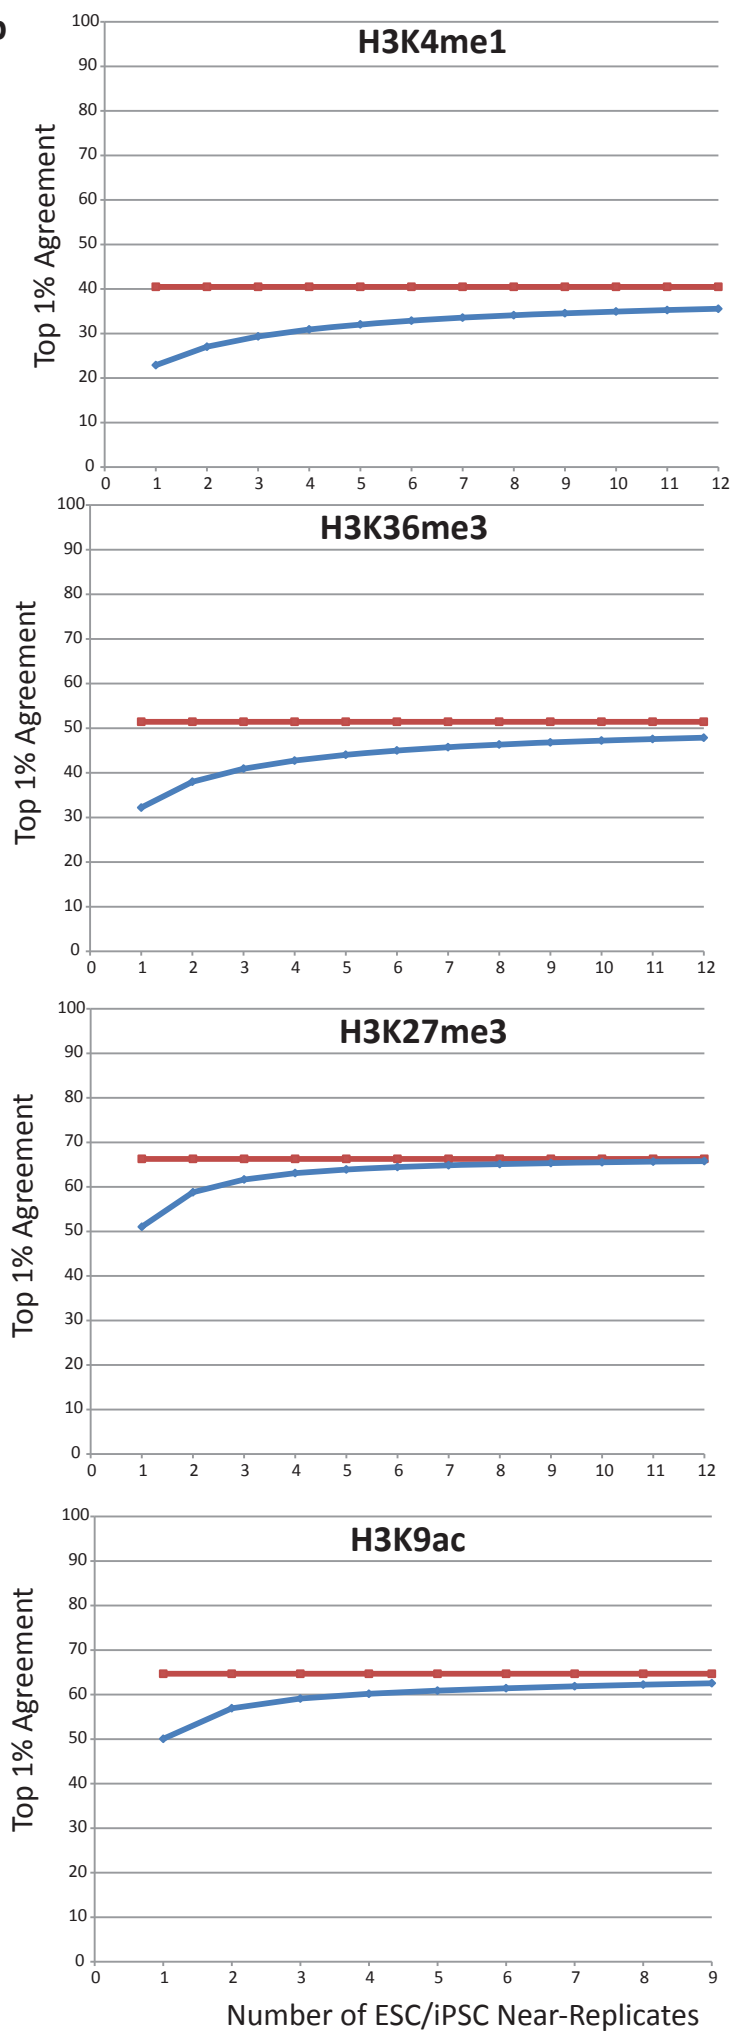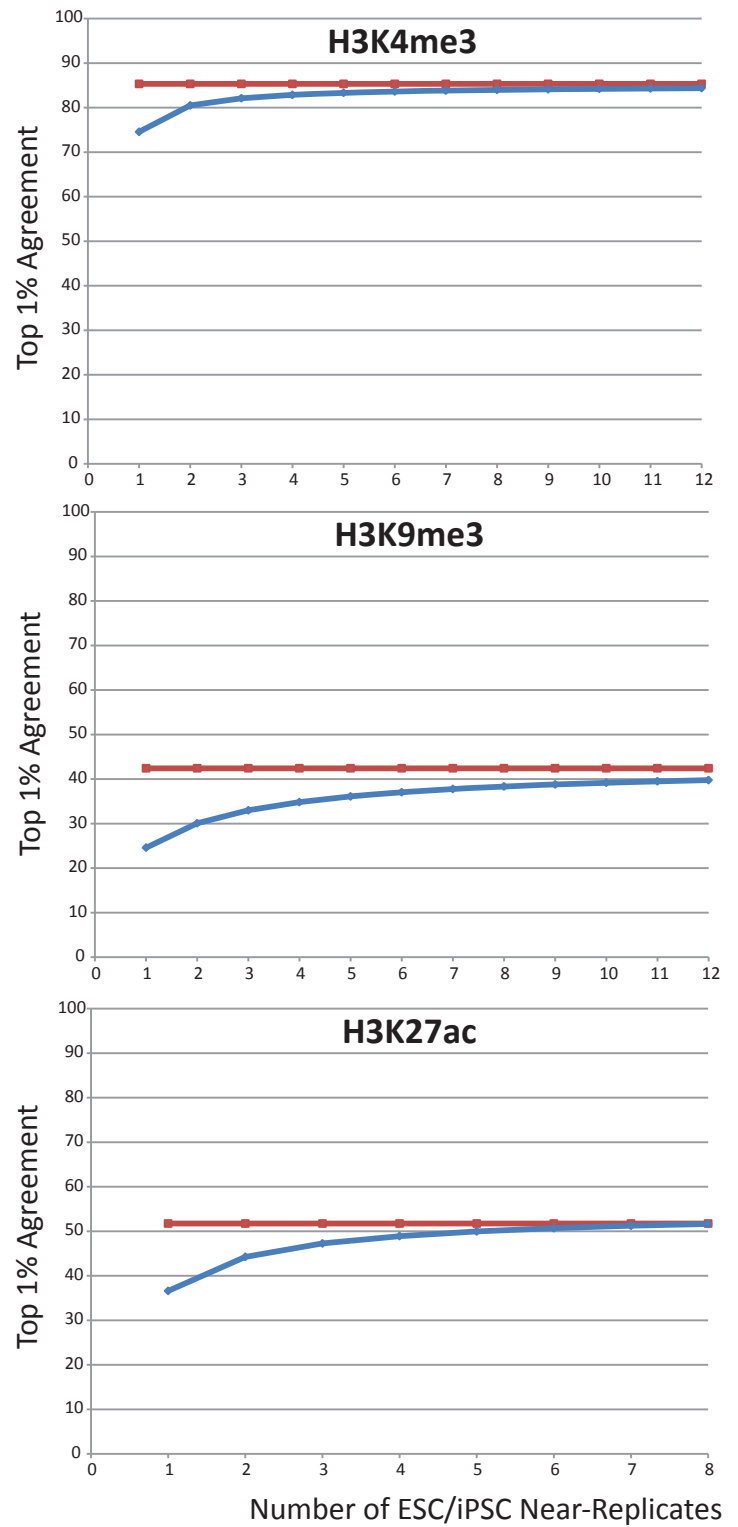

■ Imputed  
◆ ESC/iPSC Near-Replicates

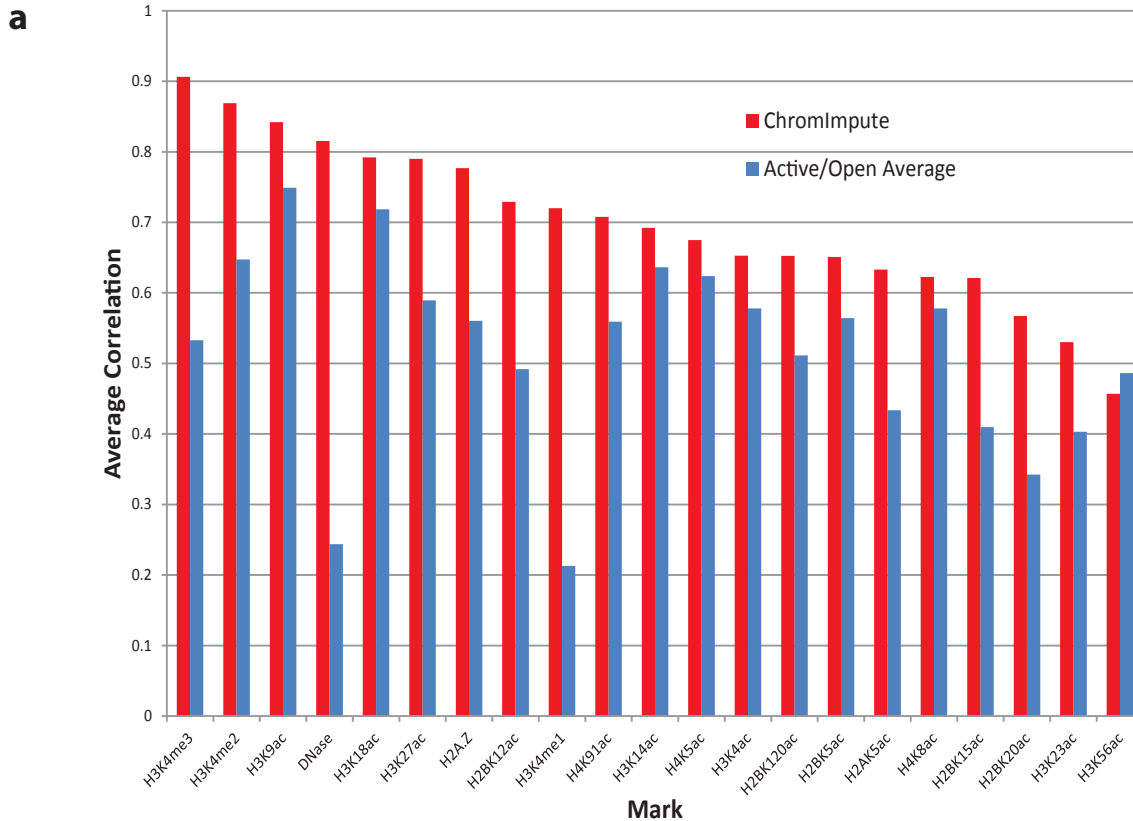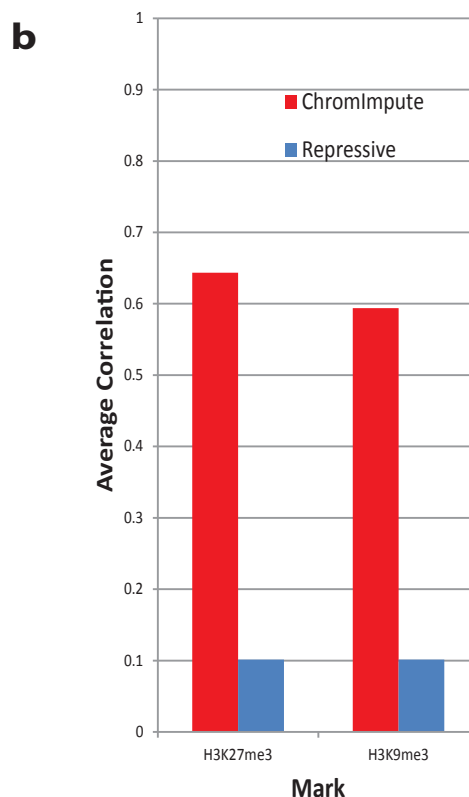

**Supplementary Figure 11: Comparison with Averaging Subset of Other Marks in the Same Sample.**

(a) A comparison of predicting a set of putative active/open marks (H3K4me1/2/3, H2A.Z, DNase, and acetylations) by averaging all other such marks from the same sample compared with ChromImpute predictions evaluated based on average correlation with the observed data. (b) Predicting the repressive marks H3K9me3 and H3K27me3 with the other repressive mark in the same sample compared with ChromImpute predictions evaluated based on average correlation with observed data.

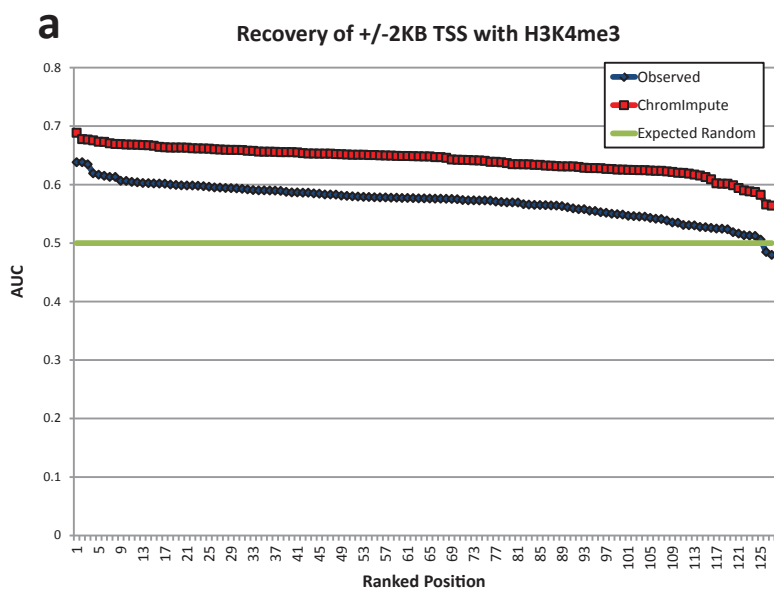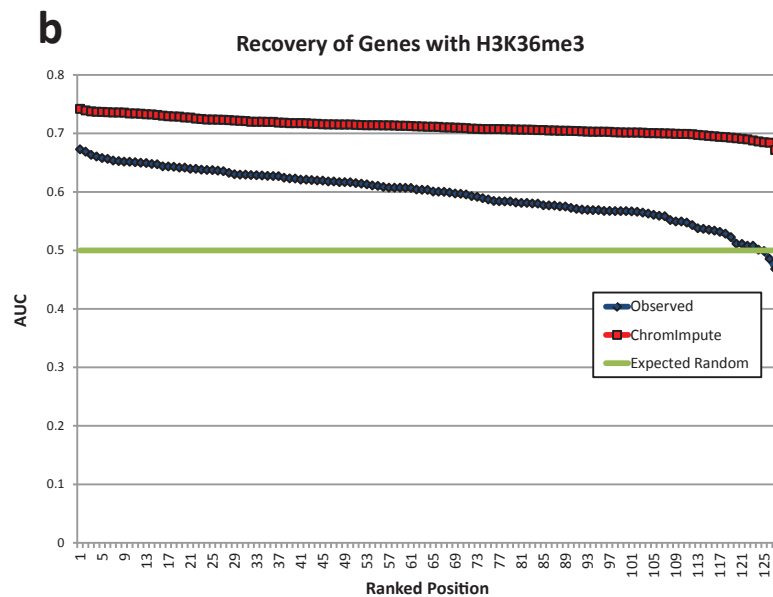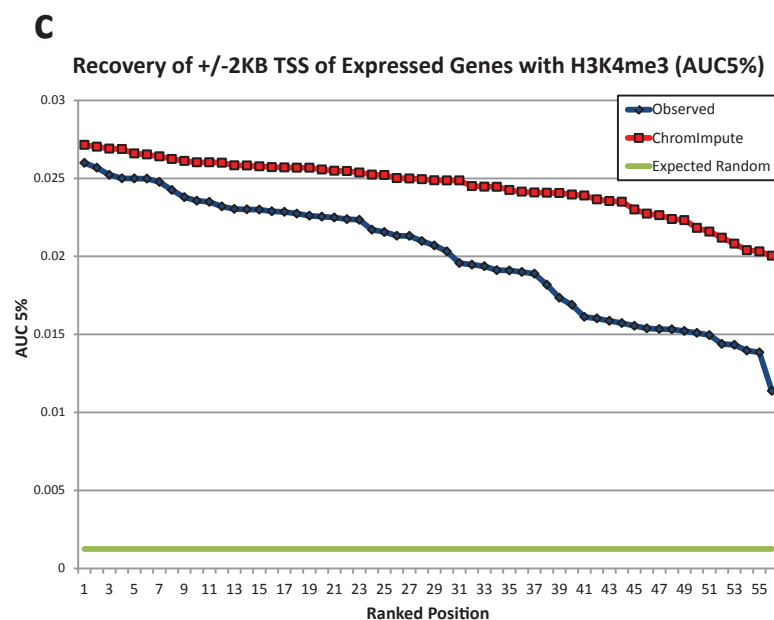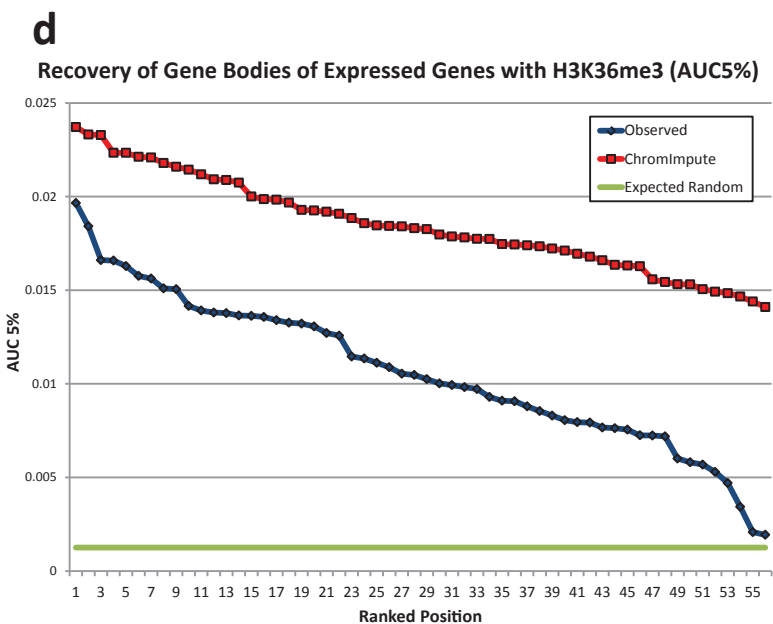

### Supplementary Figure 12: Observed and Imputed Mark Recovery of Genomic Features

These are similar plots to main **Fig 3a,b** except **(a,b)** reporting the full AUC for **(a)** H3K4me3 recovery of +/-2KB TSS **(b)** H3K36me3 recovery of gene bodies **(c,d)** reporting the AUC up to a 5% false positive rate based on a set of expressed genes (see **Methods**) for **(c)** the H3K4me3 signal recovering locations within 2kb of the TSS of these genes for the 56 samples with gene expression data available and **(d)** the same as (c) except for gene regions and the H3K36me3 signal.



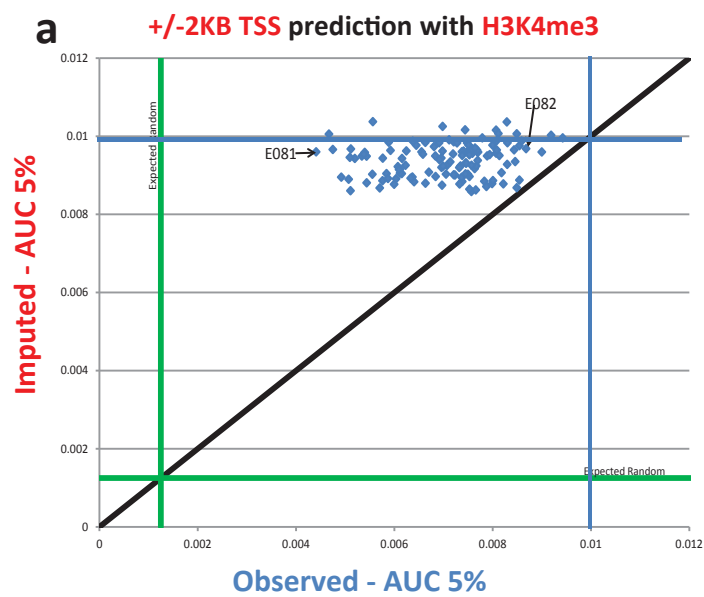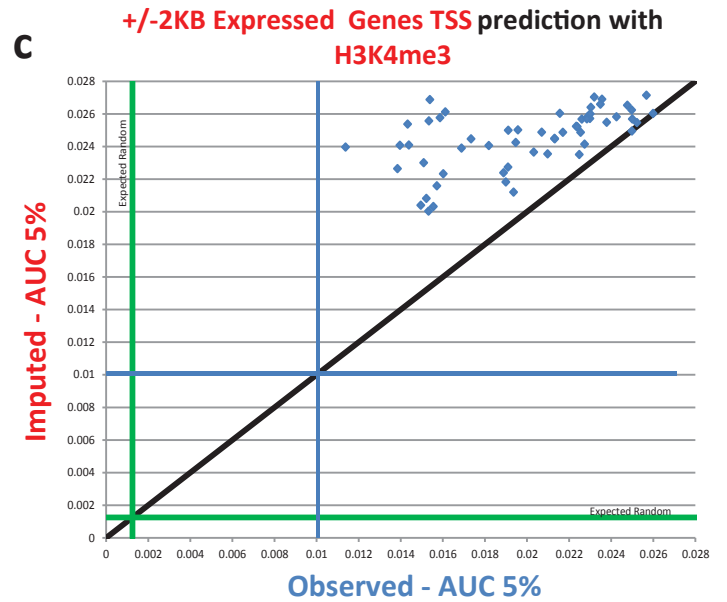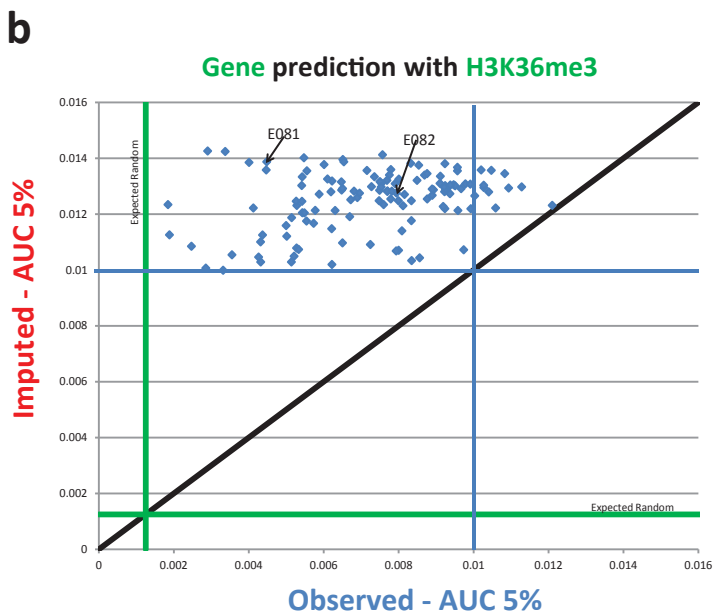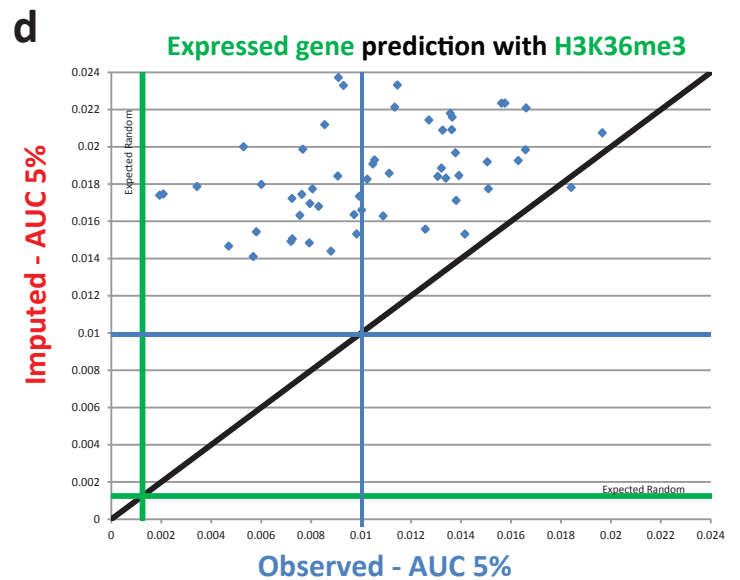

### Supplementary Figure 13:

#### Scatter Plot Comparison of Observed vs. Imputed Signal at Recovery of Annotated Gene Features.

The x-axis of these plots correspond to the area under the ROC curve up to a 5% false positive rate for the observed signal, while the y-axis shows it for the imputed data for (a) H3K4me3 recovery of locations within 2kb of annotated transcription start sites (b) H3K36me3 recovery of locations within annotated genes (c) H3K4me3 recovery of locations within 2kb of annotated transcription start sites for an expressed gene set (see **Methods**) (d) H3K36me3 recovery of locations within the expressed gene set (see **Methods**). The black line shows the  $y=x$  line, demonstrating in almost all cases the imputed data has better agreement with the annotated gene features. The green lines illustrate what would be expected by random guessing, and the blue lines mark consistently the 0.01 values in each figure.

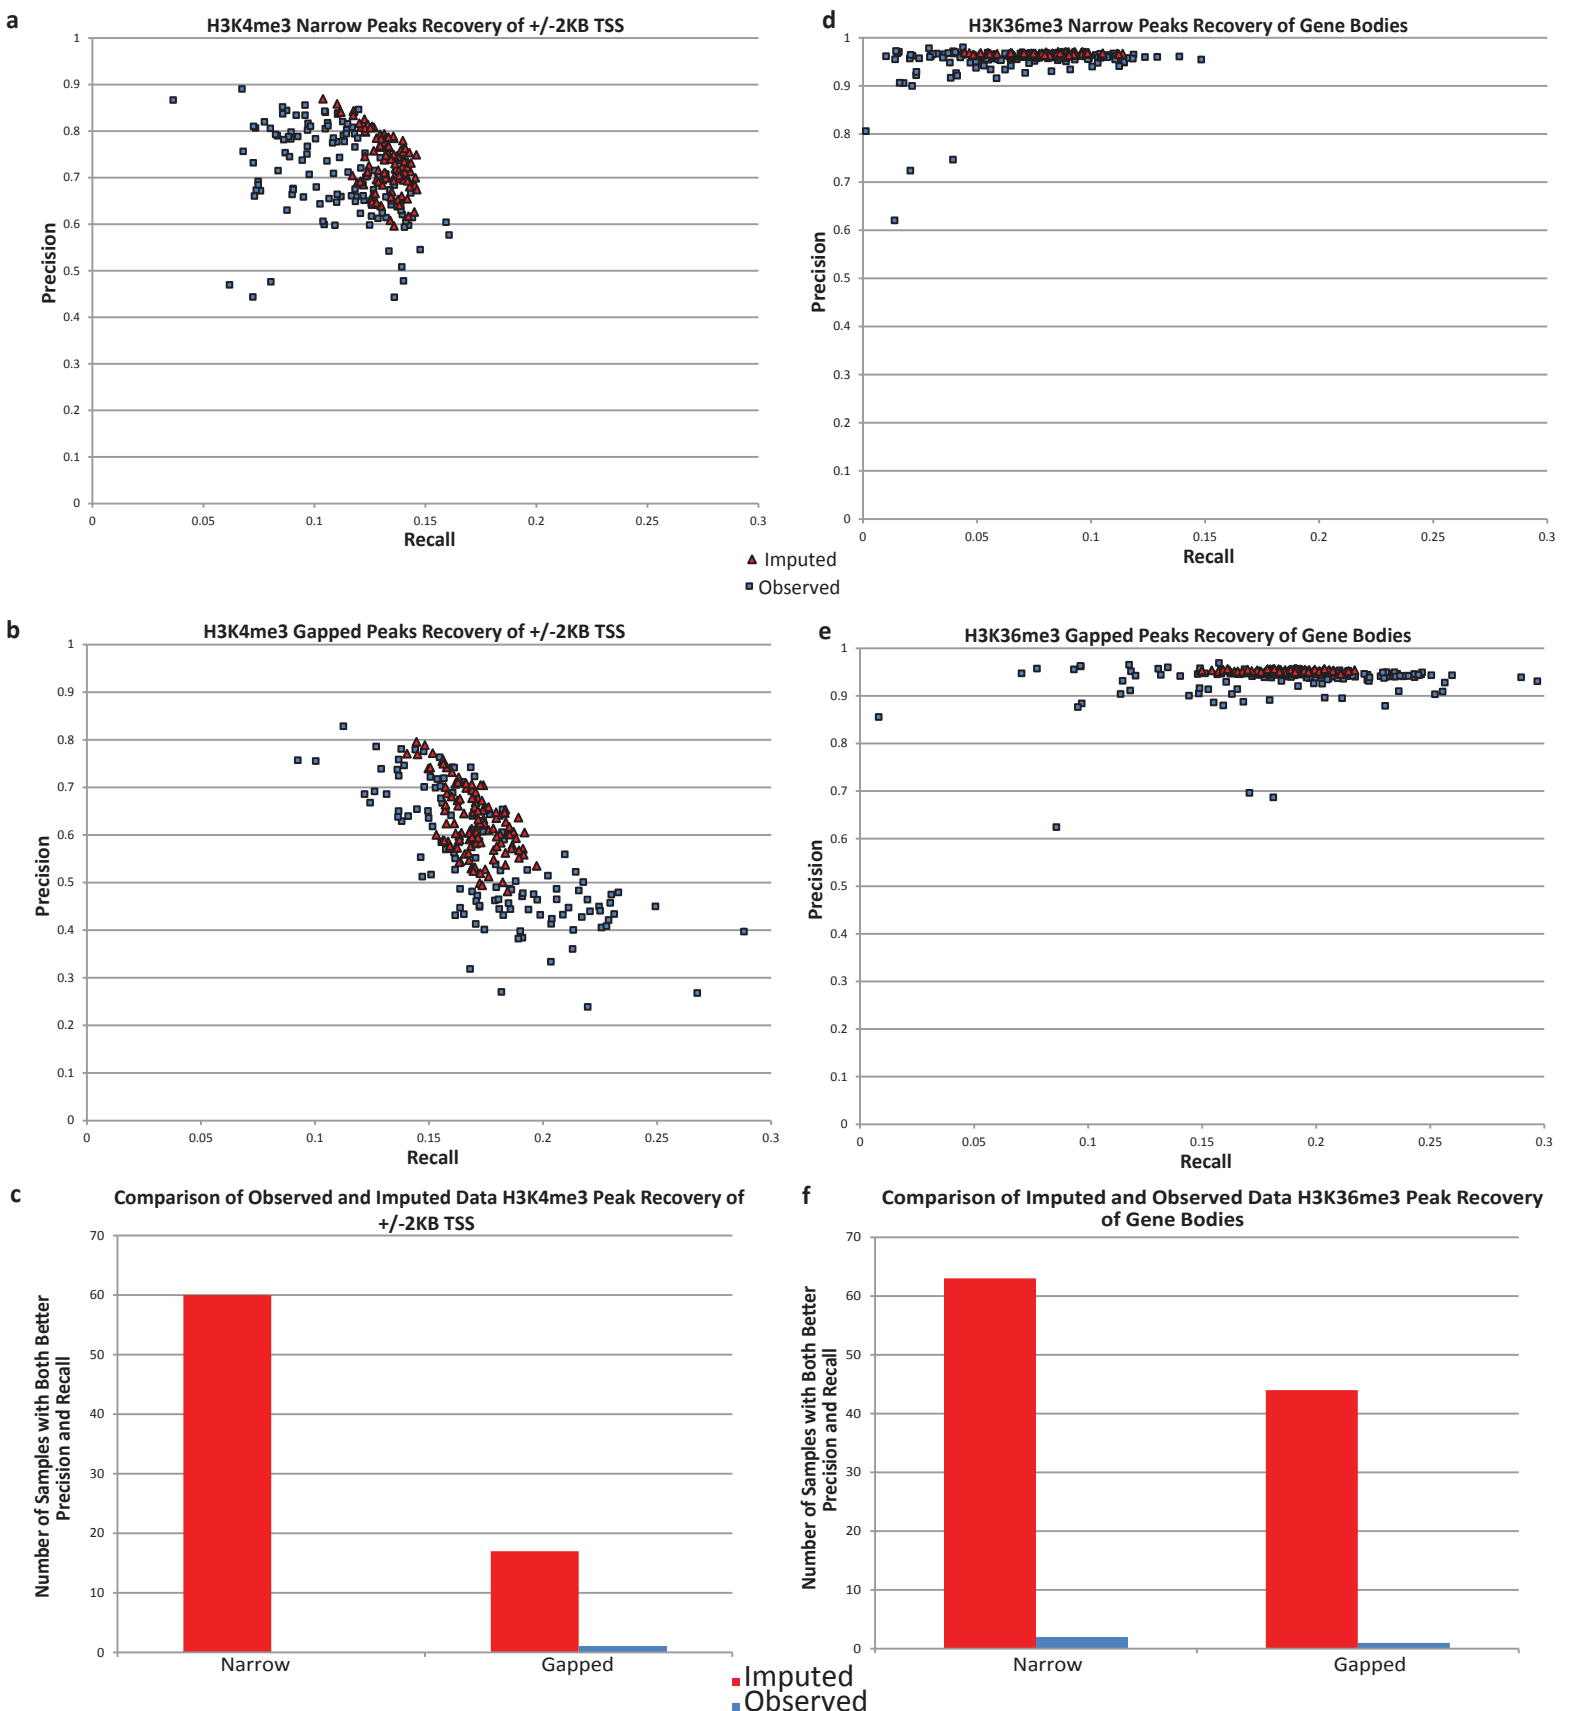

**Supplementary Figure 14: Peak Calls Agreement with Annotated Features.**

**(a)** Precision and recall of narrow peak calls for H3K4me3 overlap with locations within 2kb of annotated TSS. Each dot in red corresponds to a peak call set based on the imputed and in blue based on the observed data **(b)** Same as **a** except for gapped peaks. **(c)** The number of samples for which the peak calls based on imputed (observed) H3K4me3 data had both better precision and recall than the corresponding observed (imputed) data shown for separate comparisons based on narrow and gapped peak calls. Peak call sets which were not better in both precision and recall were not counted. **(d-f)** The same as **a-c** except for H3K36me3 overlap with locations within annotated genes.

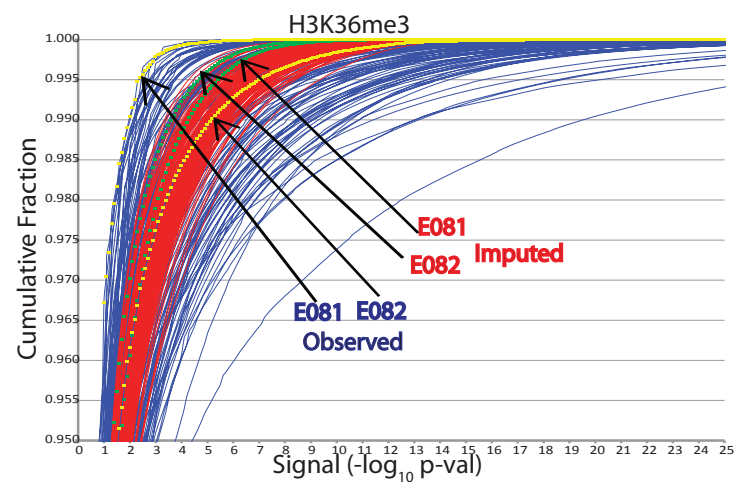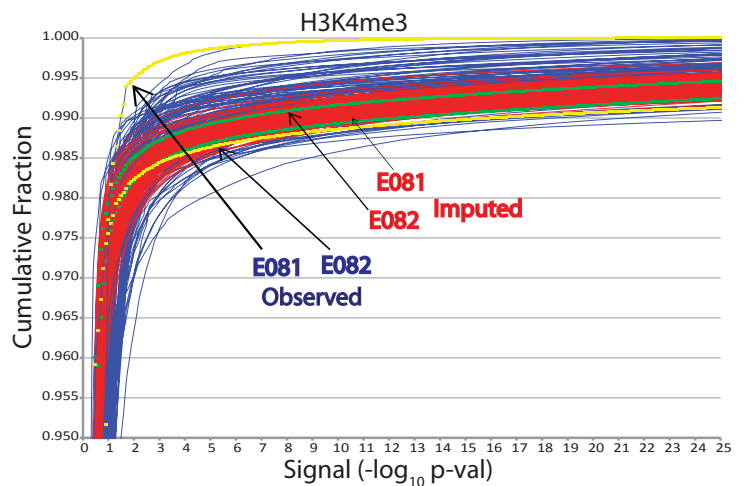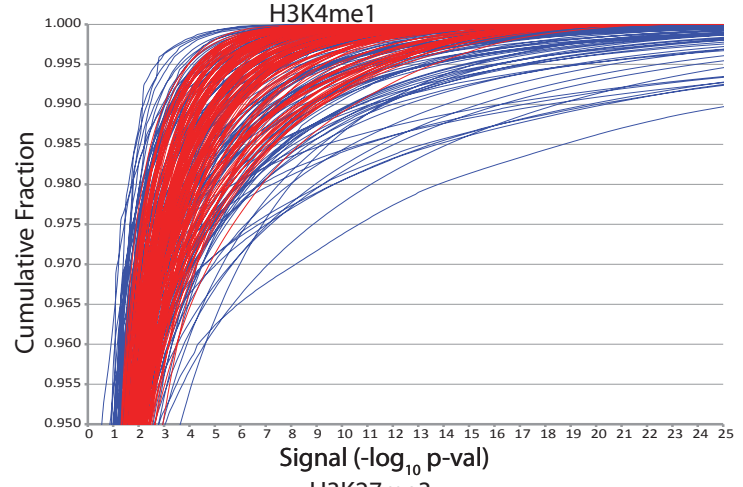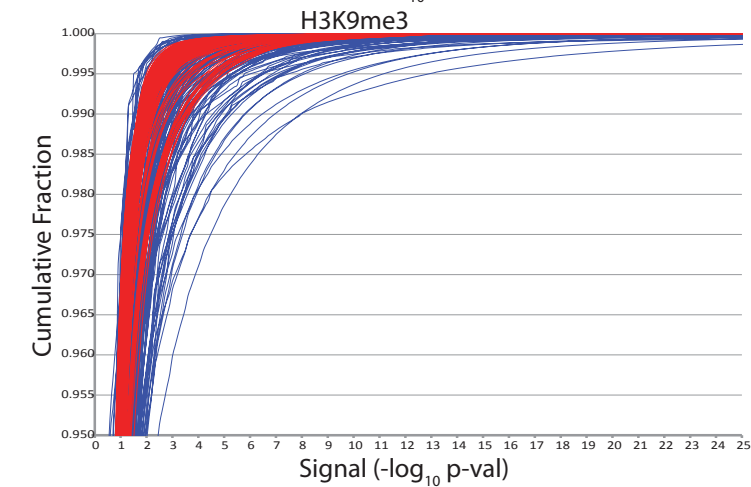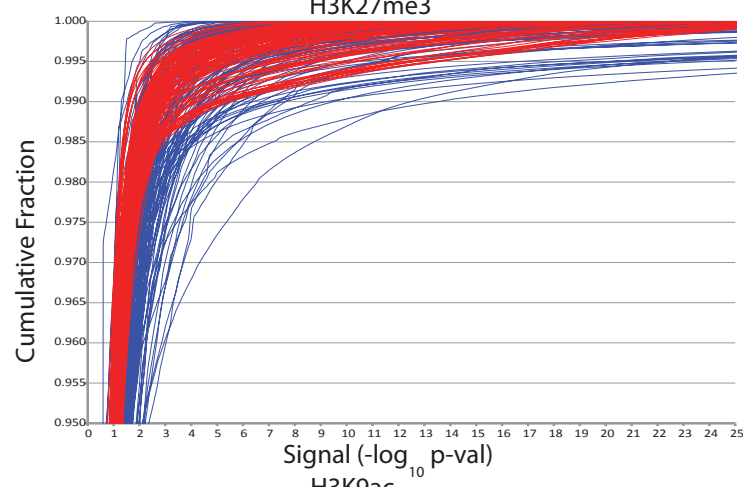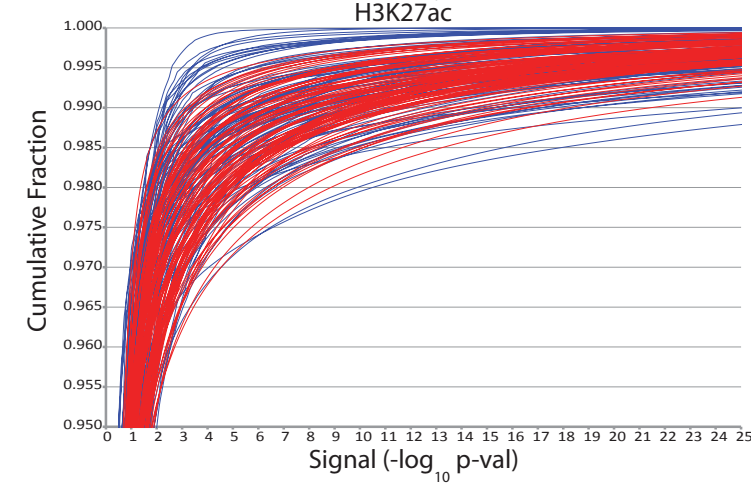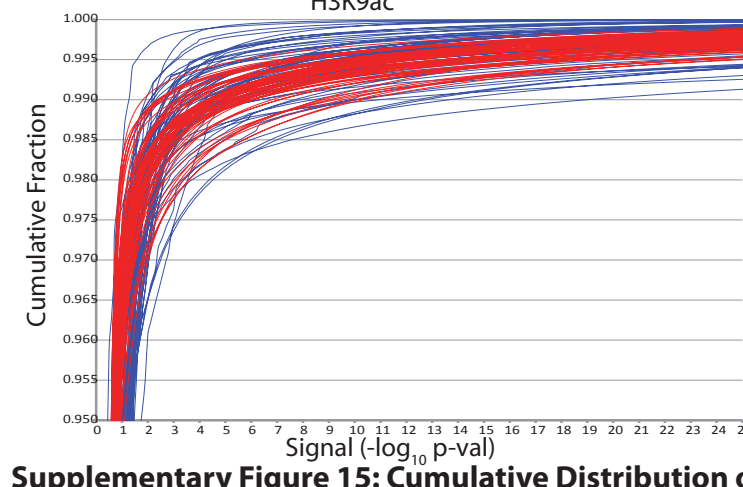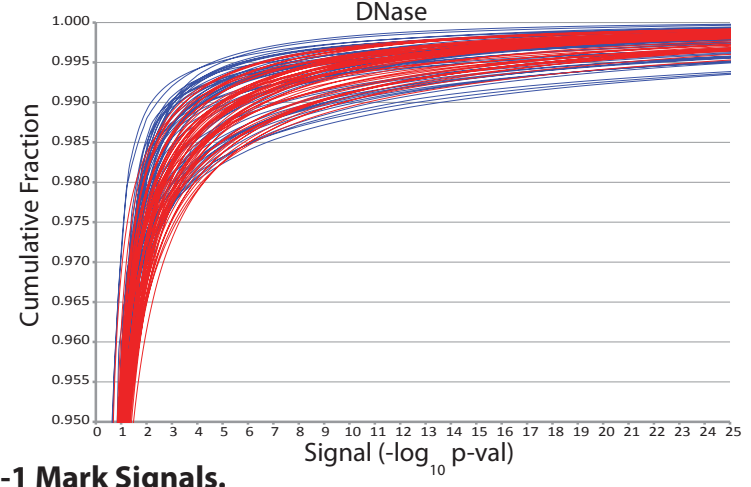

**Supplementary Figure 15: Cumulative Distribution of Tier-1 Mark Signals.**

The figure shows the cumulative distribution function plots for the eight Tier-1 marks for each sample based on the observed data in blue and the imputed data in red. These plots show the imputed signal has a more consistent distribution across samples. For H3K4me3 and H3K36me3, in yellow are the cumulative distribution for the observed data of two Fetal brain samples (E081 and E082), while in green for the imputed data, showing even for the same tissue type that the distribution of observed signal can be very different.

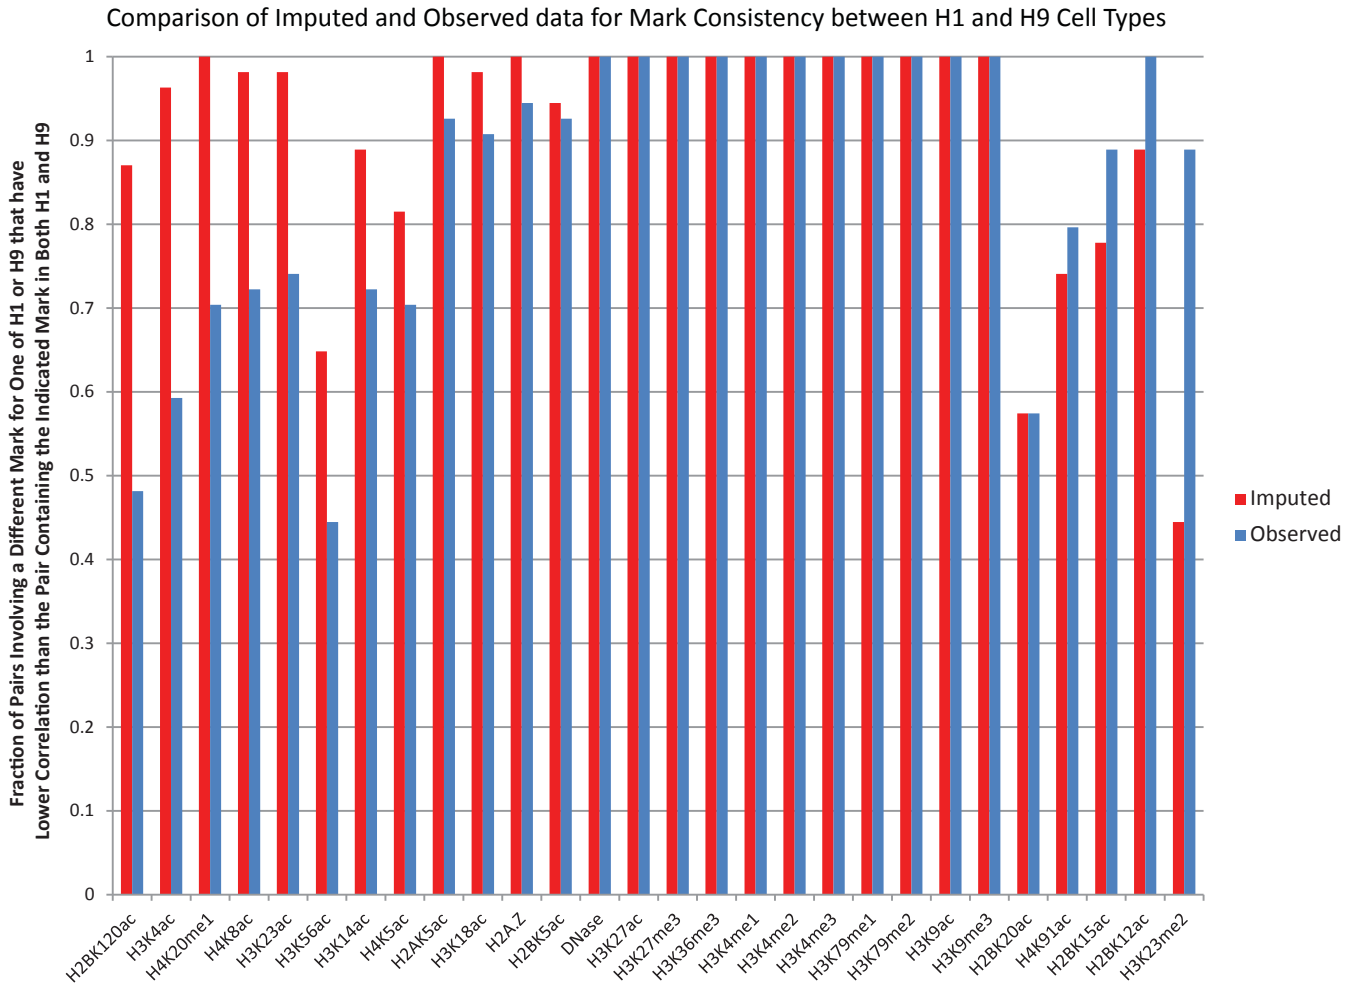

**Supplementary Figure 16:**

**Comparison of Observed and Imputed Relative Mark Agreement Between H1 and H9.**

This evaluates for a mark A, how frequently the correlation for the pair  $(A_{H1}, A_{H9})$  is greater than the correlation of any other pair  $(A_{H1}, B_{H9})$  or  $(B_{H1}, A_{H9})$  where B is a mark other than A and the subscript indicates the sample of the experiment which is either of two embryonic stem cell samples, from the H1 or H9 cell lines. This evaluation is done separately for the observed and imputed data. In total the imputed and observed data had different relative agreement on 16 marks, with the imputed data having better relative agreement for 12 of these marks, which is significant ( $p < 0.04$ ) based on a binomial test.



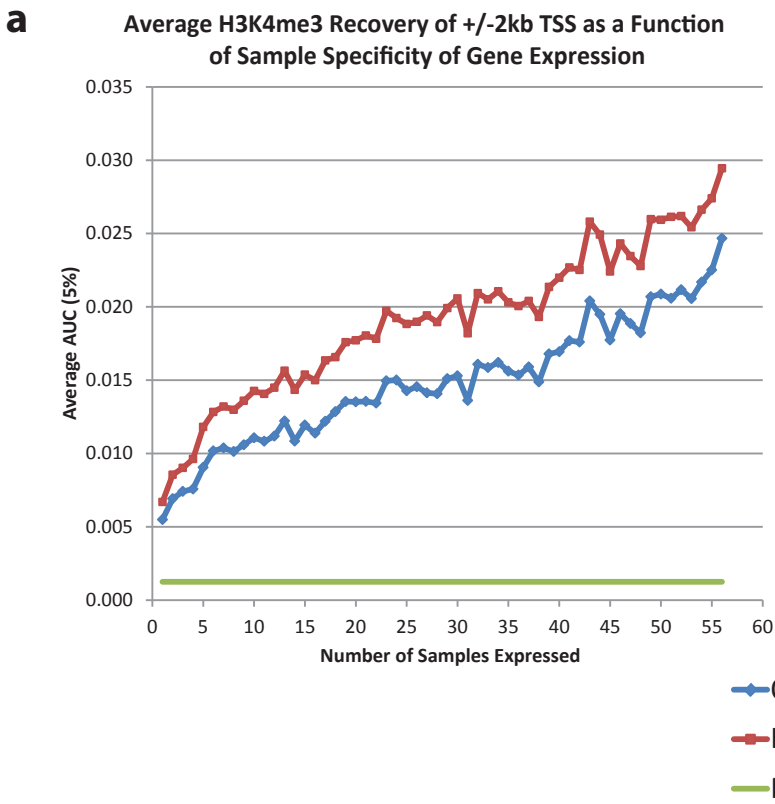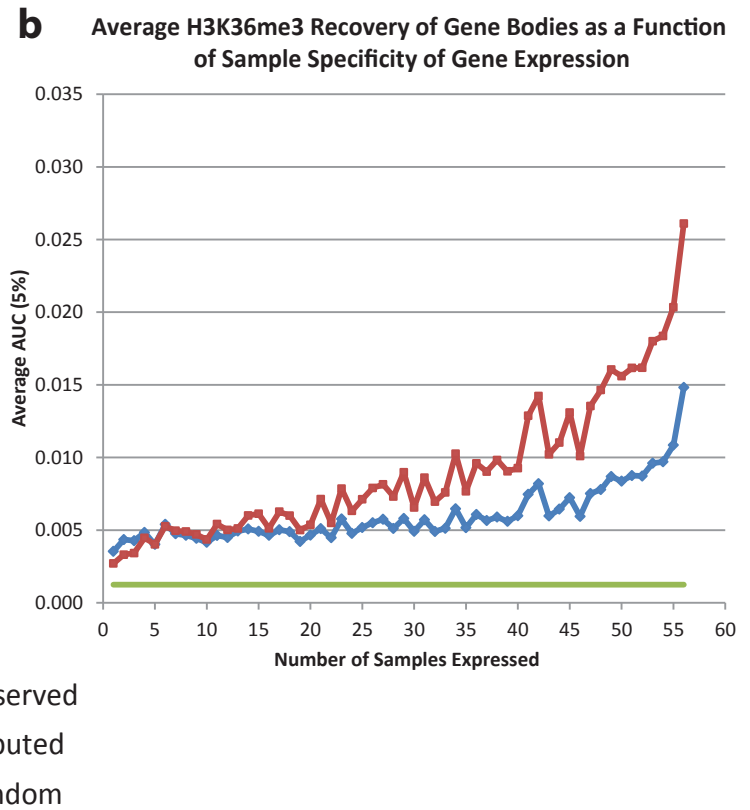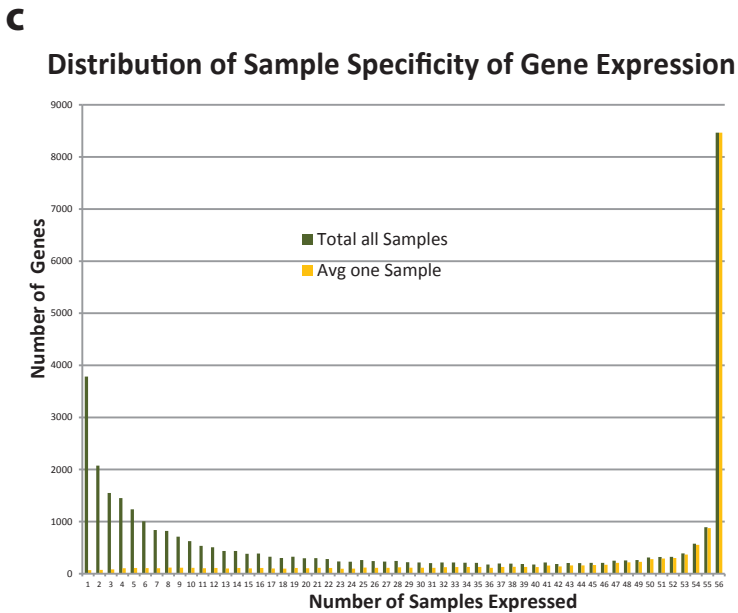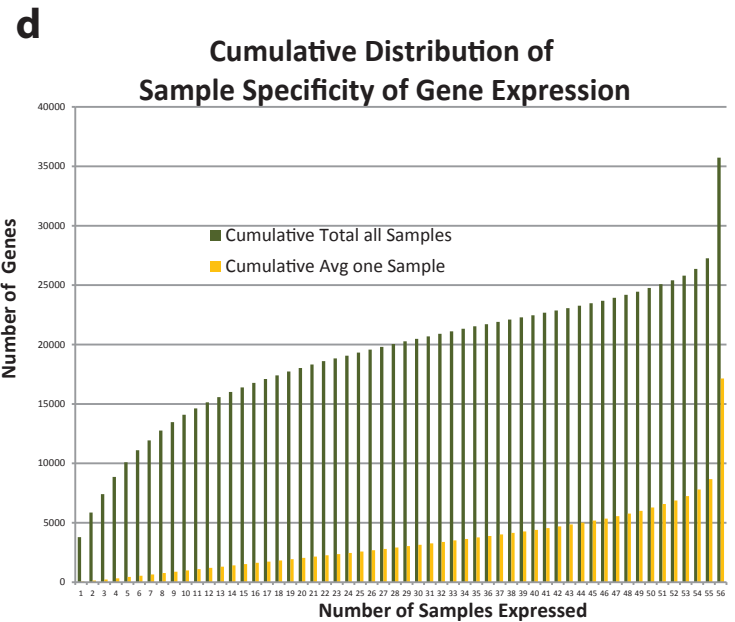

### Supplementary Figure 17:

#### Observed and Imputed Mark Recovery of Genomic Features as a Function of Sample Specificity.

**(a)** The area under the ROC curve up to a 5% false positive rate for recovering bases +/-2kb of a TSS of an expressed gene in a sample (defined as RPKM  $\geq$  0.5) conditioned on the number of samples in which the gene is expressed based on the imputed and observed H3K4me3 signal. The negative set is all other bases in the genome except positions corresponding to an expressed gene that are not expressed in the number of samples being conditioned on. The reported AUC is averaged over all the samples with expression data available. **(b)** The same as **a** except for H3K36me3 and gene bodies. **(c)** In green the count of the total number of genes expressed in the specified number of samples. In yellow the average count of the number of genes expressed in the specified number of samples among expressed genes in a given sample. The imputed data has better or similar performance in both evaluations except for recovering the gene bodies with H3K36me3 for a limited number of the most sample specific genes. **(d)** The same as **c** except showing the cumulative totals.

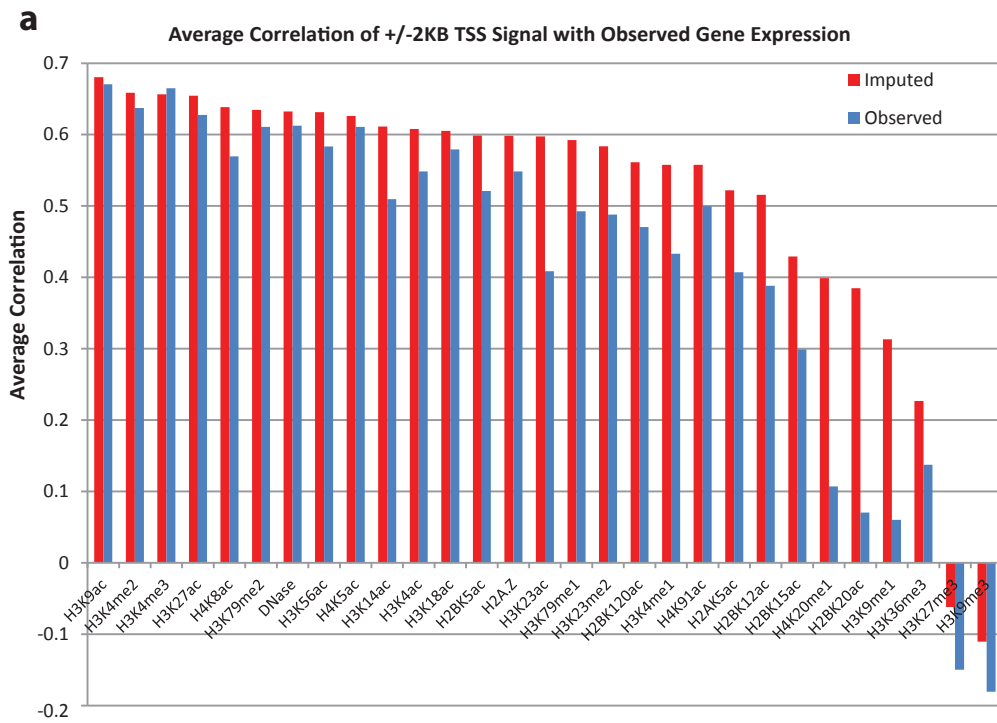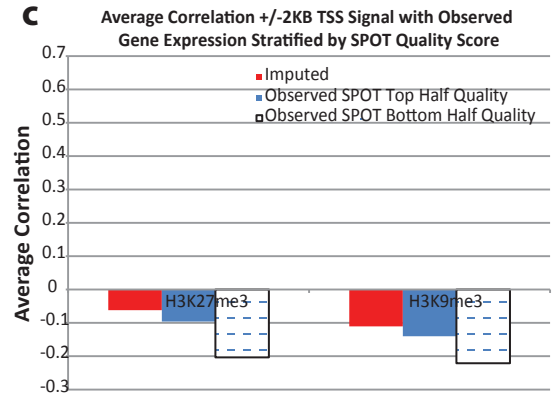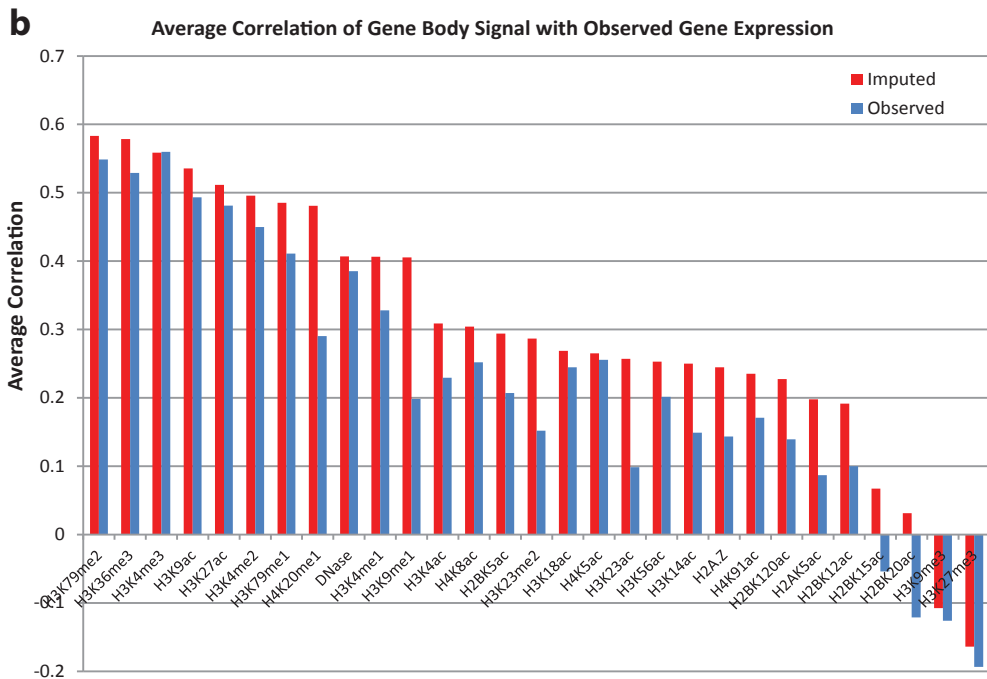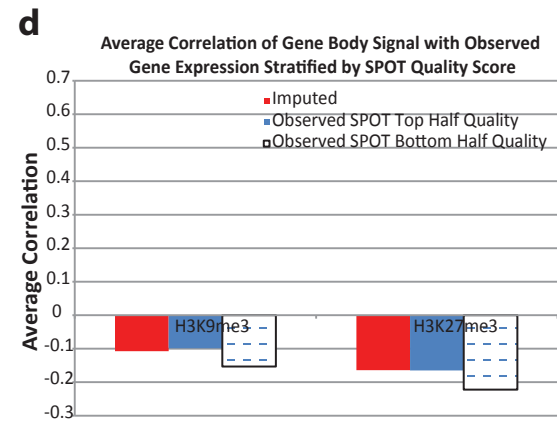

**Supplementary Figure 18:**

**Comparison of Observed and Imputed Chromatin Mark Data Correlation with Observed Gene Expression.**

(a) For each of the tier 1-3 marks mapped in at least two samples for both the imputed and observed data the average correlation of the mark signal within +/-2KB TSS with gene expression. Signal was represented by computing the average of the signal values within the range adding one and then taking a log transformation. The correlations were computed separately for each sample with observed data available for the mark and gene expression, and then averaged. For most marks there was a greater positive correlation with gene expression for the imputed data compared to the observed data. (b) The same as a, but for annotated gene bodies. (c) The correlation of the two repressive marks, H3K27me3 and H3K9me3, for +/-2KB TSS signal with gene expression with the observed data stratified based on whether the sample is in the top half or bottom half of observed datasets considered by the SPOT quality score<sup>10</sup> compared with the imputed data correlation. This shows the stronger negative correlation with gene expression for the observed data for the repressive marks is associated with data sets with lower quality as scored by SPOT. (d) The same as c but for gene bodies.

a

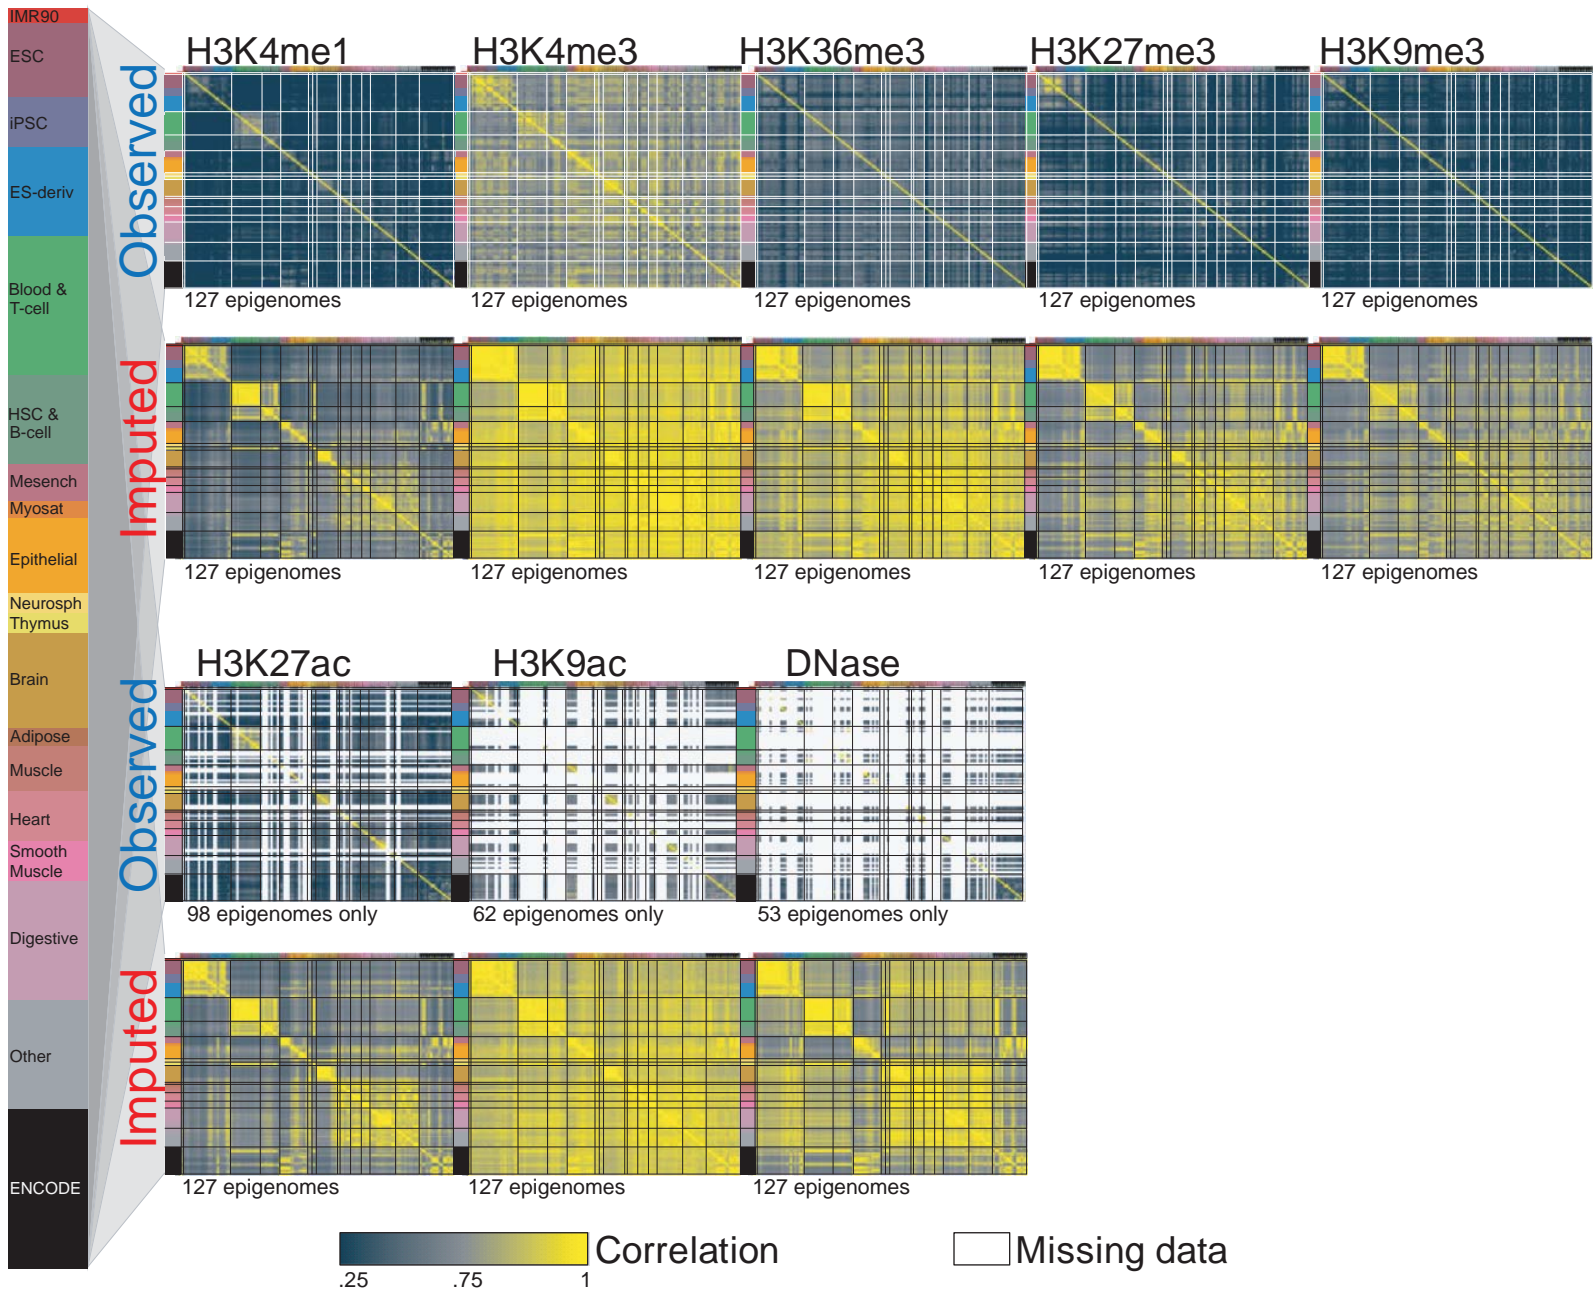

**Supplementary Figure 19: Sample correlations for imputed vs. observed signal.**

The same heatmap of pairwise correlations for observed and imputed data as shown in **Fig. 3e**, but showing **(a)** all the Tier-1 marks **(b)** the Tier-2 marks, RNA-seq, and DNA-methylation **(c)** heatmap of pairwise correlations for observed and imputed data of the Tier-1 marks not mapped in every sample, RNA-seq, DNA-methylation, and Tier-2 marks only showing the subset of samples for which there is observed data available **(d)** heatmap of pairwise correlations for the imputed data for the Tier-3 marks.

**b**

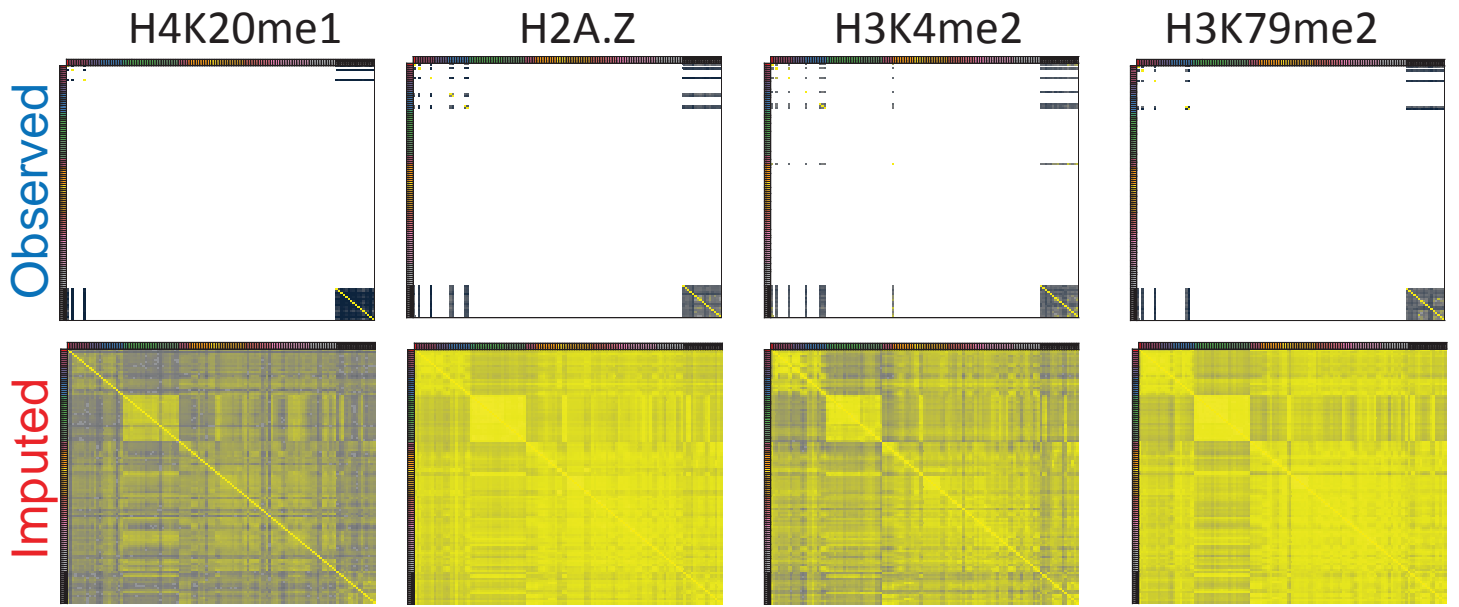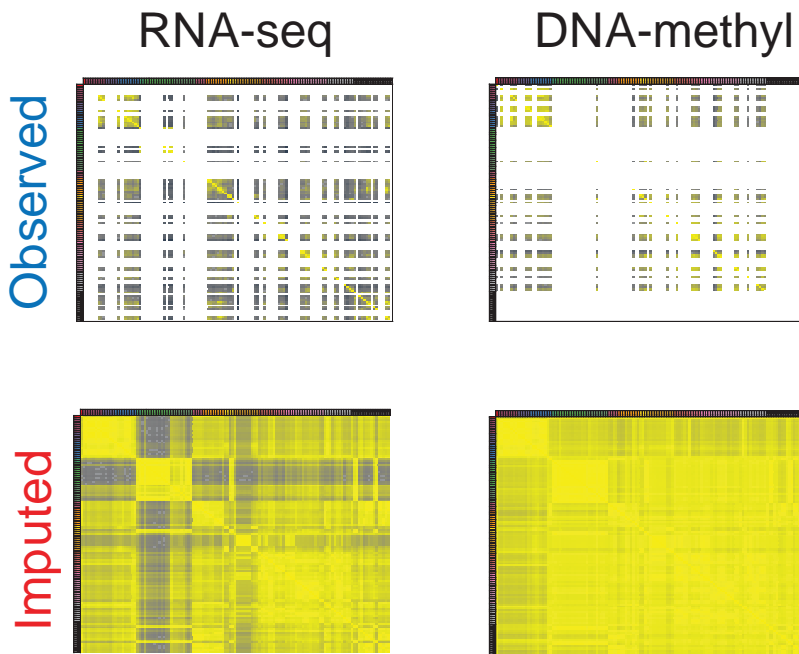

c

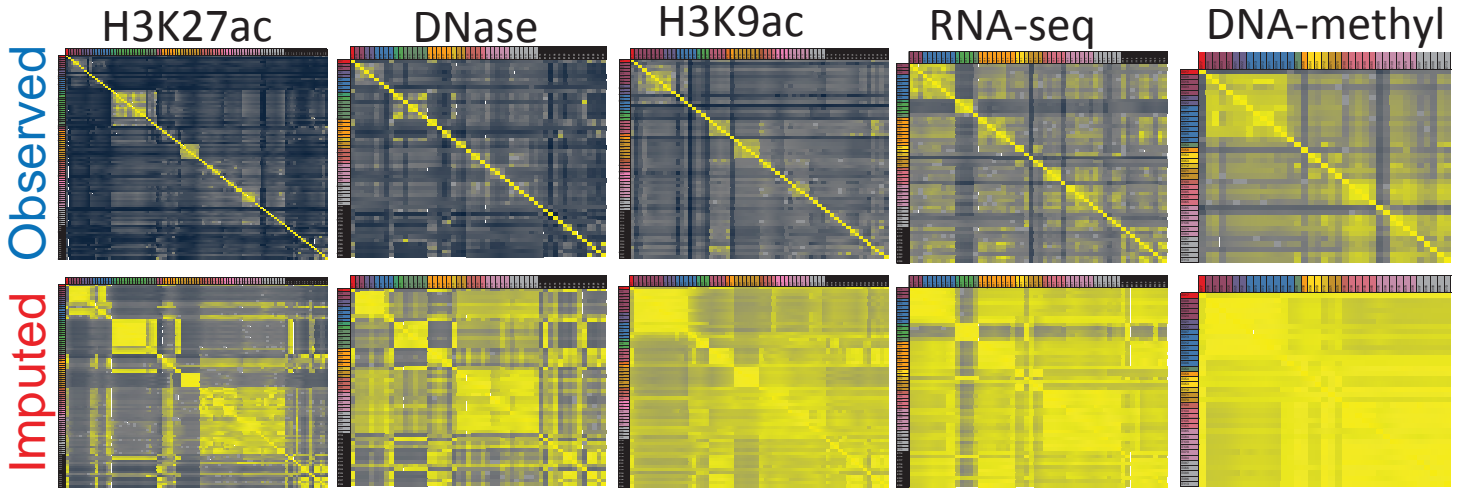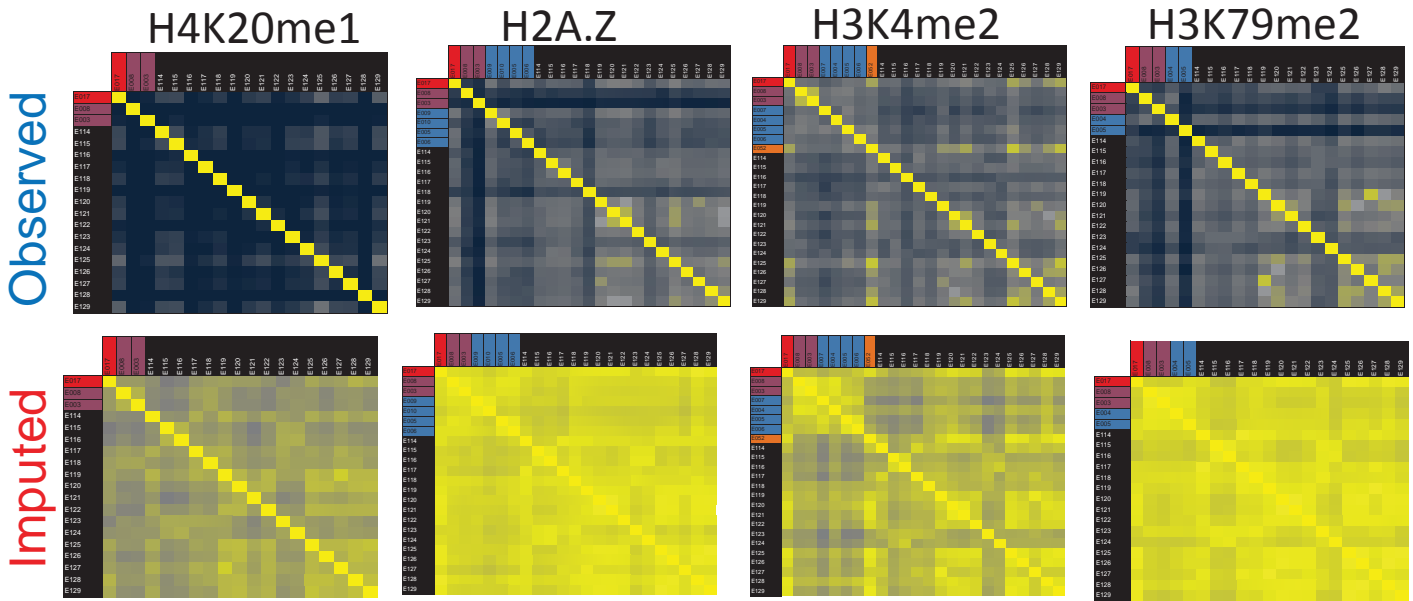

H2AK5ac

H2AK9ac

H2BK5ac

H2BK12ac

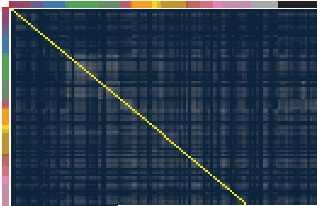

H2BK15ac

H2BK20ac

H2BK120ac

H3K4ac

H3K14ac

H3K18ac

H3K23ac

H3K56ac

H4K5ac

H4K8ac

H4K12ac

H4K91ac

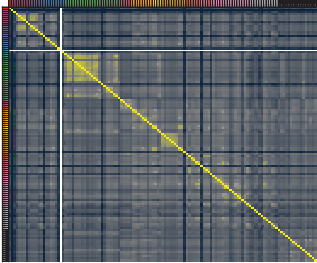

H3K9me1

H3K23me2

H3K79me1

H3T11ph

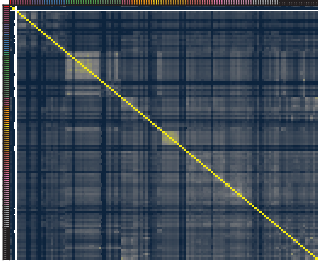



**a** AUC for Classifying Pairs as the Same Anatomy using Signal Correlation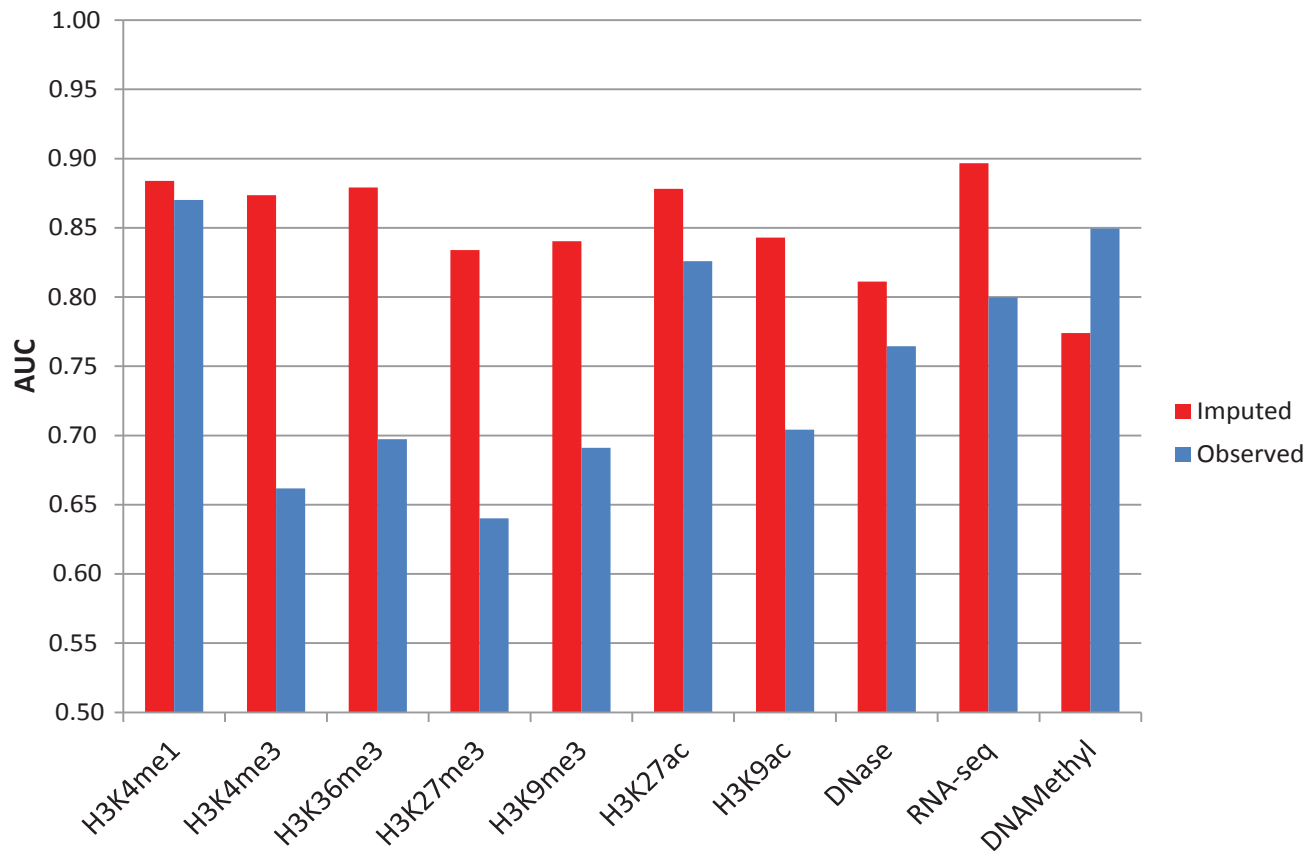**b** AUC for Classifying Pairs as the Same Group using Peak Call Correlation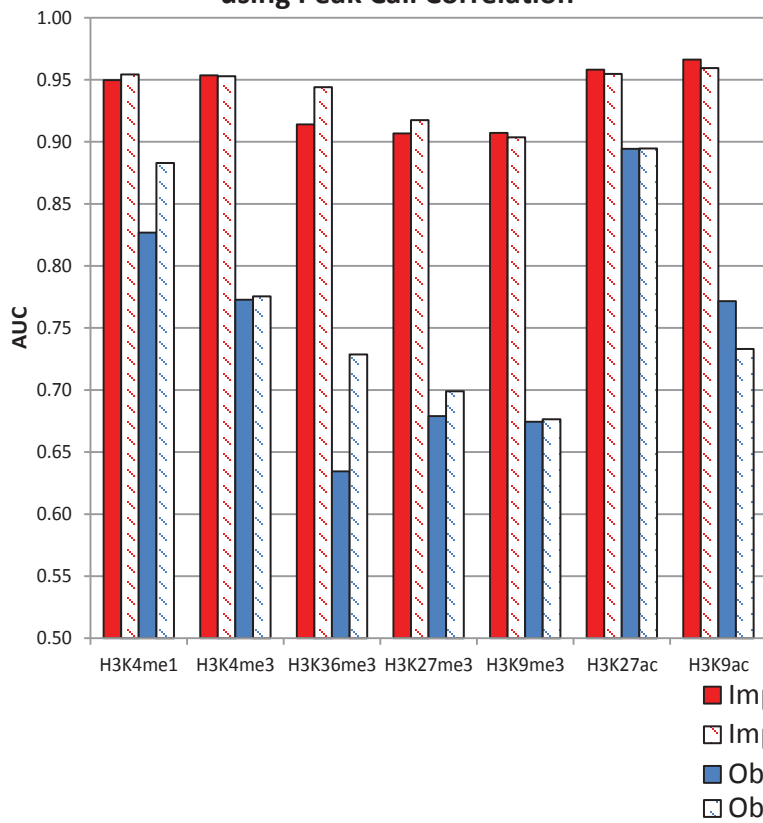**c** AUC for Classifying Pairs as the Same Anatomy using Peak Call Correlation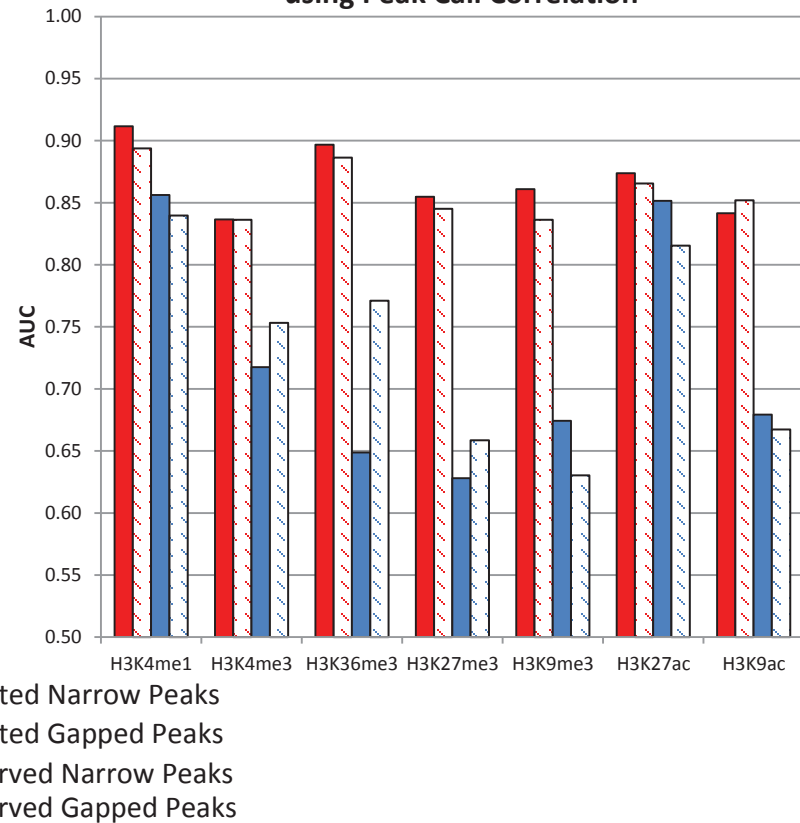**Supplementary Figure 20: Prediction of Same Anatomy and Group Pairs.**

(a) This is the same evaluation of mark signal correlation pairs as in **Fig. 3f** except for anatomy annotations<sup>10</sup> (**Table S1**) opposed to sample group annotations. (b) The same evaluation as in **Fig. 3f** except based on histone mark peak calls with results shown for both gapped and narrow peak calls. The correlations were computed the same as for the signal except being at the base level and treating a base as having a signal of 1 if it was covered by a peak call and 0 otherwise. (c) The same evaluation as in **b**, but for anatomy annotations.

|                | H3K27me3    |               |            | H3K36me3    |               |            | H3K4me1     |               |            | H3K4me3     |               |            | H3K9me3     |               |            | H3K27ac     |               |            |
|----------------|-------------|---------------|------------|-------------|---------------|------------|-------------|---------------|------------|-------------|---------------|------------|-------------|---------------|------------|-------------|---------------|------------|
|                | ChromImpute | Group Average | Difference |
| ESC            | 0.73        | 0.74          | -0.02      | 0.29        | 0.26          | 0.03       | 0.39        | 0.36          | 0.03       | 0.56        | 0.53          | 0.03       | 0.42        | 0.42          | 0.00       | 0.54        | 0.55          | 0.00       |
| iPSC           | 0.88        | 0.97          | -0.08      | 0.87        | 0.76          | 0.11       | 0.77        | 0.69          | 0.09       | 0.95        | 0.89          | 0.06       | 0.85        | 0.82          | 0.03       | 0.77        | 0.72          | 0.05       |
| ES-deriv       | 0.42        | 0.40          | 0.03       | 0.56        | 0.48          | 0.07       | 0.58        | 0.48          | 0.10       | 0.88        | 0.87          | 0.01       | 0.57        | 0.47          | 0.10       | 0.59        | 0.50          | 0.08       |
| Blood & T-cell | 0.78        | 0.70          | 0.08       | 0.77        | 0.72          | 0.04       | 0.58        | 0.45          | 0.13       | 0.90        | 0.88          | 0.03       | 0.72        | 0.63          | 0.09       | 0.73        | 0.69          | 0.05       |
| HSC & B-cell   | 0.87        | 0.76          | 0.11       | 0.85        | 0.81          | 0.04       | 0.81        | 0.65          | 0.17       | 0.89        | 0.89          | 0.00       | 0.63        | 0.58          | 0.04       | 0.72        | 0.56          | 0.17       |
| Mesench        | 0.77        | 0.71          | 0.06       | 0.84        | 0.80          | 0.04       | 0.84        | 0.73          | 0.11       | 0.96        | 0.95          | 0.01       | 0.67        | 0.60          | 0.08       | 0.85        | 0.74          | 0.12       |
| Epithelial     | 0.83        | 0.73          | 0.10       | 0.83        | 0.74          | 0.09       | 0.82        | 0.63          | 0.18       | 0.97        | 0.95          | 0.02       | 0.62        | 0.59          | 0.04       | 0.85        | 0.84          | 0.01       |
| Neurosp        | 0.58        | 0.54          | 0.04       | 0.77        | 0.64          | 0.12       | 0.74        | 0.69          | 0.06       | 0.97        | 0.96          | 0.01       | 0.73        | 0.68          | 0.06       |             |               |            |
| Thymus         | 0.69        | 0.58          | 0.12       | 0.67        | 0.57          | 0.10       | 0.67        | 0.65          | 0.02       | 0.90        | 0.82          | 0.08       | 0.29        | 0.26          | 0.03       | 0.80        | 0.69          | 0.11       |
| Brain          | 0.76        | 0.71          | 0.05       | 0.81        | 0.79          | 0.02       | 0.85        | 0.80          | 0.05       | 0.97        | 0.95          | 0.02       | 0.72        | 0.67          | 0.05       | 0.91        | 0.90          | 0.01       |
| Muscle         | 0.41        | 0.33          | 0.08       | 0.52        | 0.44          | 0.08       | 0.59        | 0.45          | 0.14       | 0.91        | 0.79          | 0.12       | 0.47        | 0.34          | 0.12       | 0.80        | 0.65          | 0.15       |
| Heart          | 0.56        | 0.27          | 0.28       | 0.37        | 0.28          | 0.09       | 0.67        | 0.51          | 0.16       | 0.57        | 0.41          | 0.16       | 0.41        | 0.19          | 0.22       | 0.88        | 0.87          | 0.00       |
| Sm. Muscle     | 0.80        | 0.70          | 0.10       | 0.83        | 0.74          | 0.08       | 0.73        | 0.67          | 0.07       | 0.95        | 0.93          | 0.02       | 0.78        | 0.62          | 0.17       | 0.79        | 0.66          | 0.13       |
| Digestive      | 0.84        | 0.76          | 0.08       | 0.83        | 0.78          | 0.04       | 0.72        | 0.46          | 0.26       | 0.96        | 0.94          | 0.02       | 0.77        | 0.76          | 0.02       | 0.86        | 0.75          | 0.11       |
| Other          | 0.69        | 0.63          | 0.07       | 0.69        | 0.62          | 0.07       | 0.63        | 0.47          | 0.16       | 0.85        | 0.84          | 0.01       | 0.39        | 0.31          | 0.07       | 0.47        | 0.38          | 0.10       |
| ENCODE         | 0.39        | 0.39          | 0.00       | 0.71        | 0.66          | 0.05       | 0.73        | 0.51          | 0.22       | 0.91        | 0.87          | 0.04       | 0.58        | 0.52          | 0.06       | 0.69        | 0.57          | 0.12       |

### Supplementary Figure 21: Comparison of ChromImpute Predictions with Group Average.

The table shows for the six marks most deeply profiled and each biological group the average correlation of ChromImpute predictions with the observed data compared to the correlation if the prediction was based on all other observed data sets for the mark within the group. The difference in the correlation between the two corresponding columns is also shown. The evaluation is based on just chr10. These results demonstrate that in almost all cases the ChromImpute predictions show better correspondence to the observed data than predictions based on the group average.

**a** AUC for Classifying Pairs of Experiments as of the Same Group Taking a Weighted Average of Observed and Imputed Data

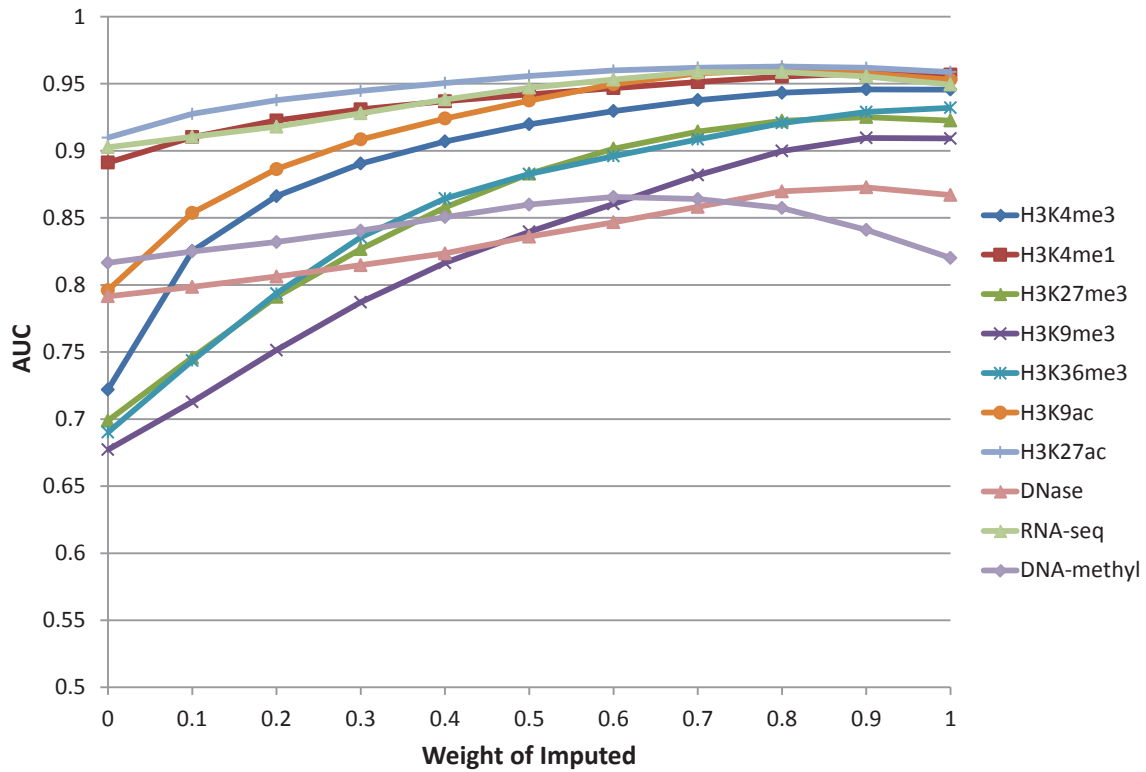

**b** AUC for Classifying Pairs of Experiments as of the Same Anatomy Taking a Weighted Average of Observed and Imputed Data

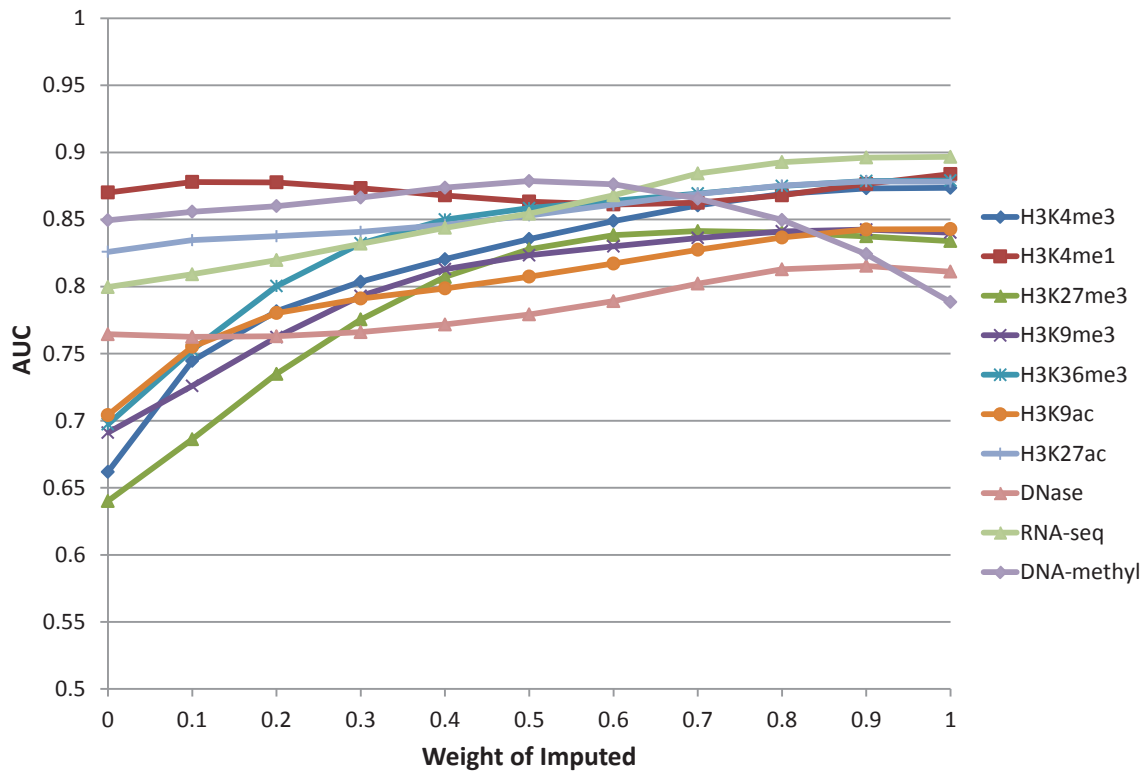

**Supplementary Figure 22: Weighted Average Based Predictions of Same Group and Anatomy Pairs.**

This figure extends the analysis shown in **Fig. 3f** and **Fig. S20a** by showing what the AUC results would be if a weighted average of the observed and imputed data is taken. The weight of the imputed data is shown on the x-axis, with a weight of 0 reducing to the observed data and a weight of 1 reducing to the imputed data. Results for the weights in increments of 0.1 are shown. This shows for all marks except DNA-methylation, the AUC obtained with all weight on the imputed data is either the best or close to the best.

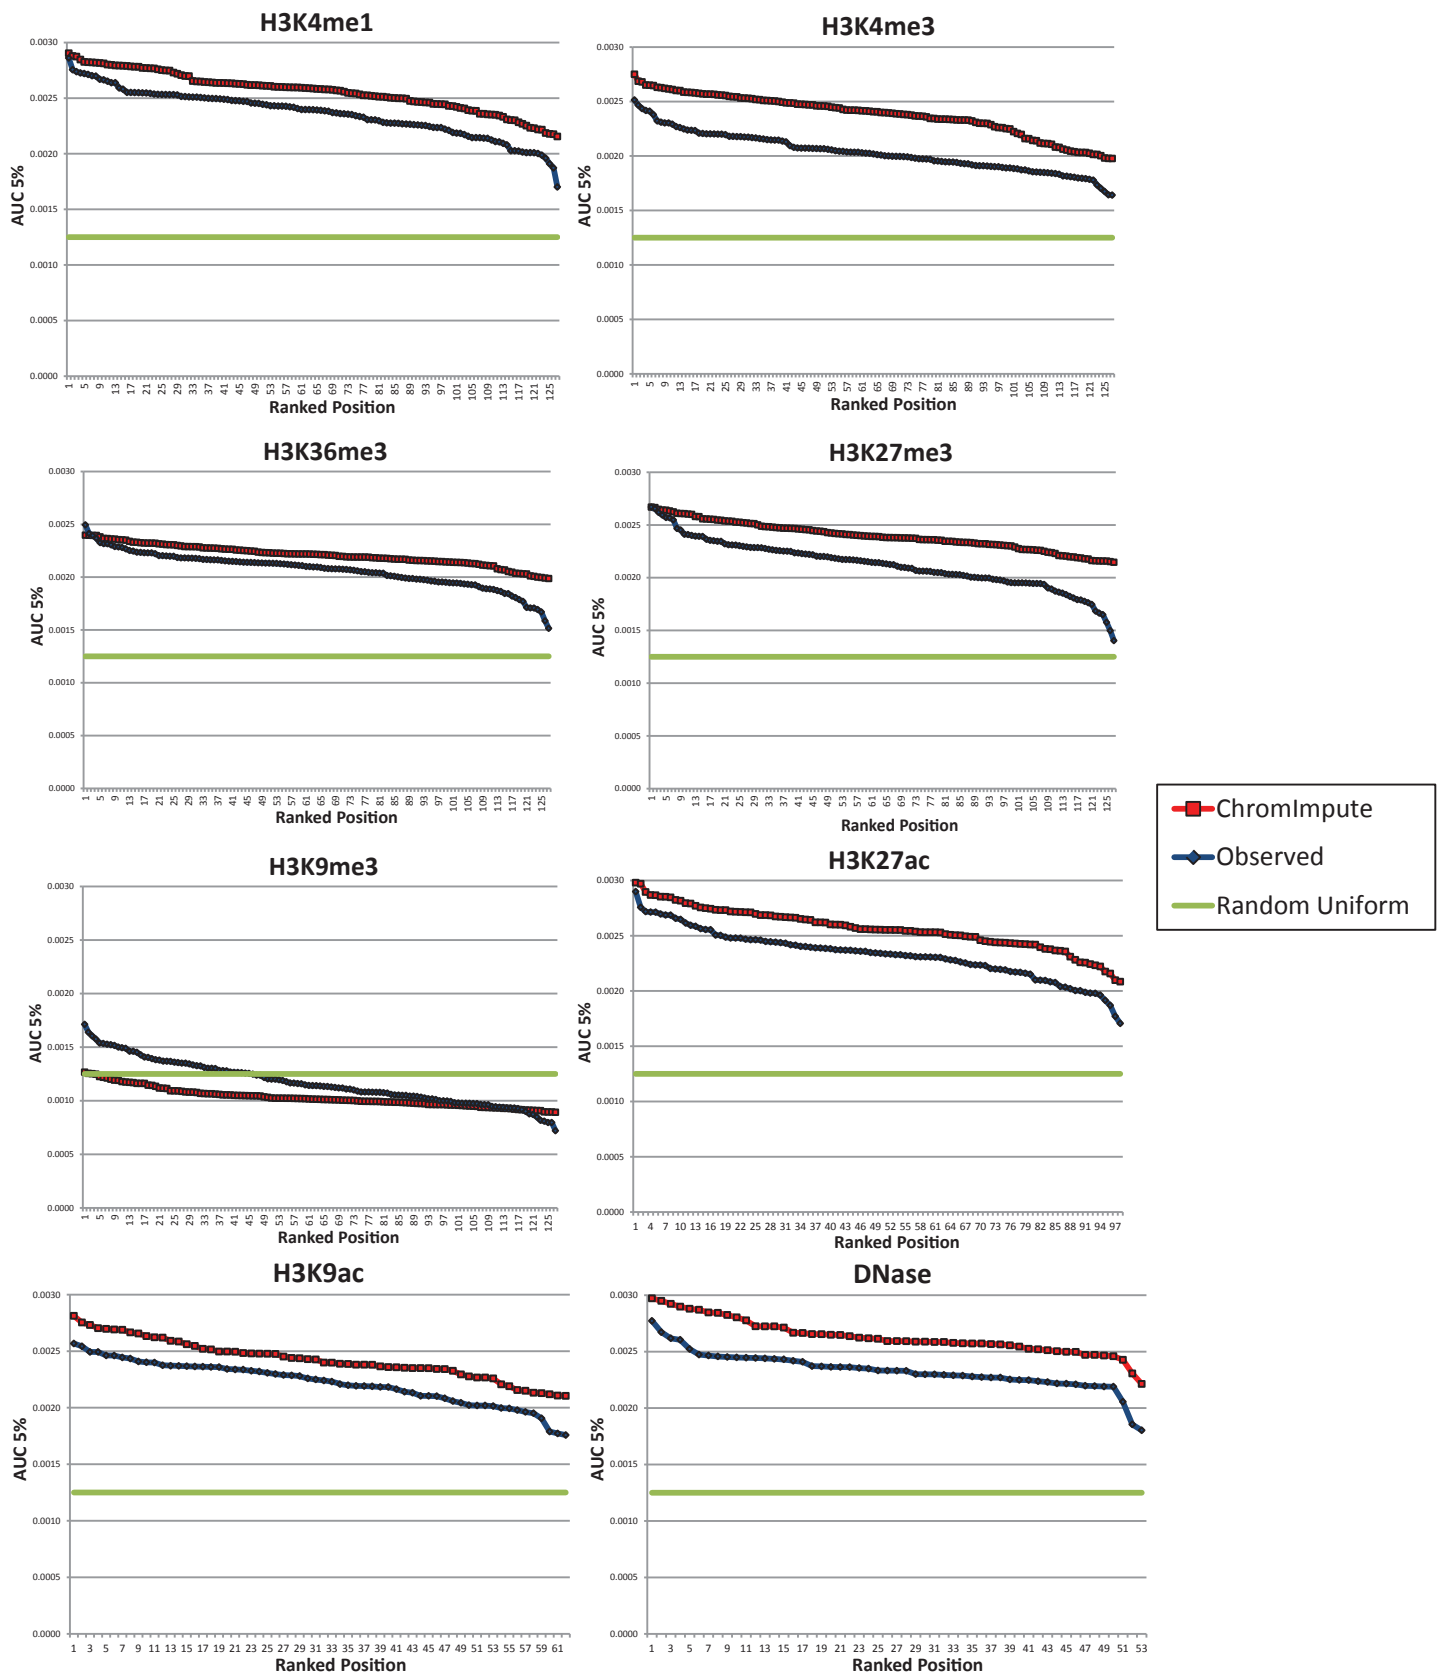

**Supplementary Figure 23: Imputed and Observed Data Recovery of NHGRI GWAS Catalog SNPs.**

The figure compares the observed and imputed data for all Tier-1 marks across each sample where both is available in terms of the extent to which higher signal levels associates with increased recovery of SNPs in the GWAS catalog as measured by the area under the ROC curve up to a 5% false positive rate. The horizontal line is what expected by a uniform random baseline. Other baseline models could be assumed here, but the focus here is comparing the imputed and observed data. For all the marks considered except H3K9me3 the imputed data has better recovery than observed and uniform random baseline, while for H3K9me3 the imputed data shows a stronger depletion than the observed data and uniform baselines.

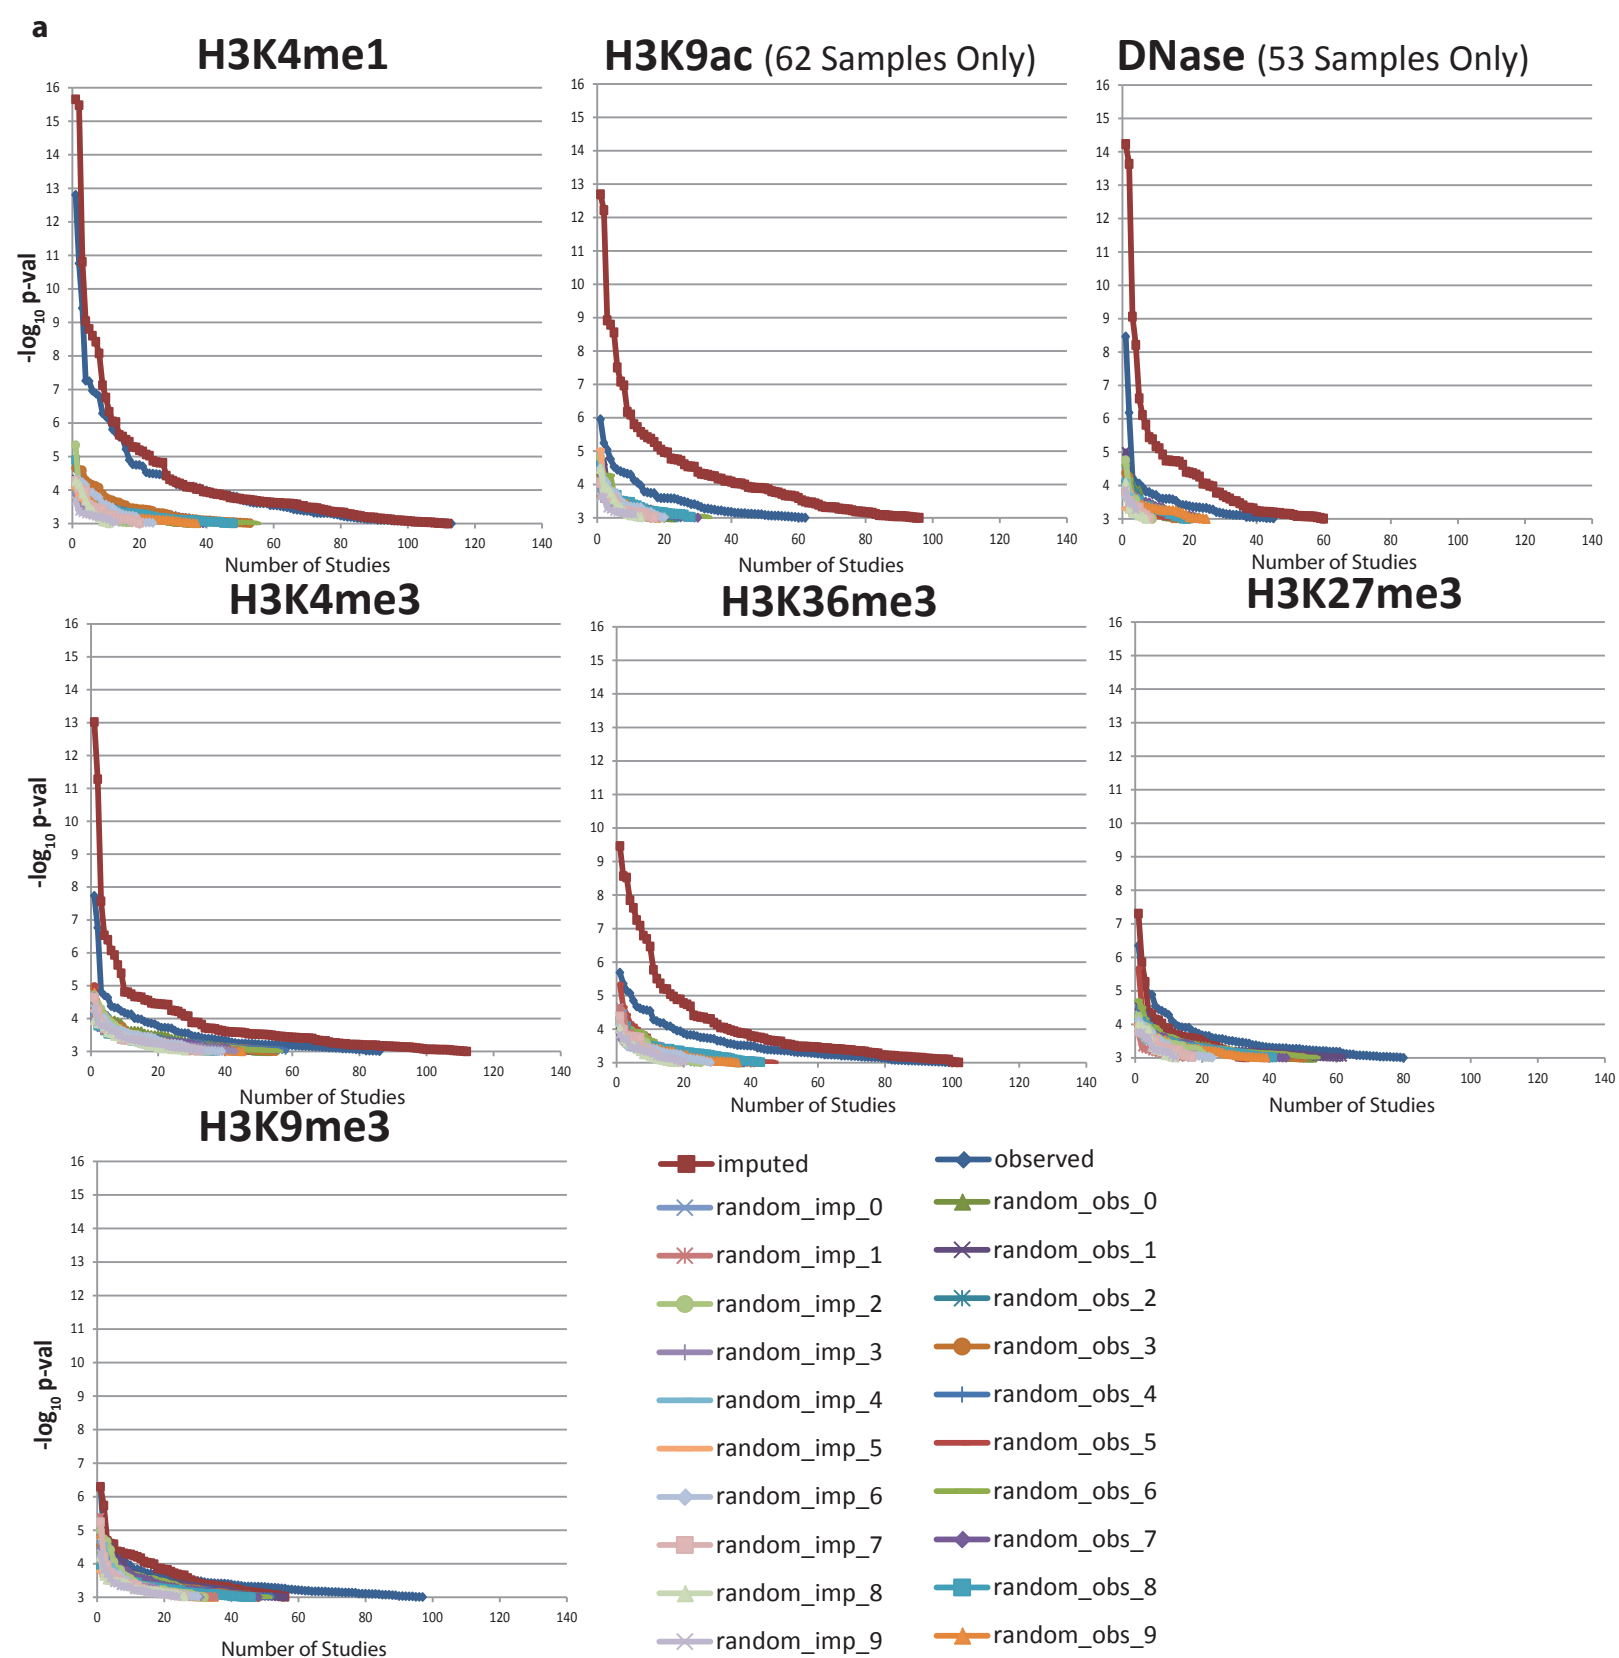

**Supplementary Figure 24:**

**Imputed and Observed Data Correspondence with Genome-wide Association Studies (GWAS) – Max Sample.**

**(a)** Similar to **Fig. 4a** but for the other Tier-1 marks. The x-axis shows the number of studies for which there was at least one sample for which the indicated mark signal was significantly different for the study identified SNPs compared to a background of all GWAS Catalog SNPs at a significance level indicated on the y-axis based on a Mann-Whitney U test (see **Methods**). This is shown based on the imputed and observed data with the actual GWAS catalog, along with the observed and imputed data based on ten randomizations of the GWAS catalog. For H3K9ac and DNase the comparison was limited to only those samples where both imputed and observed data is available. **(b)** Shows for each of the Tier-1 marks the number of studies that are estimated to be significant in at least one sample based on the imputed data in samples with observed data available at an estimated false discovery rate below 10% and in comparison based on averaging the observed signal across all cell types (see **Methods**).

**b**

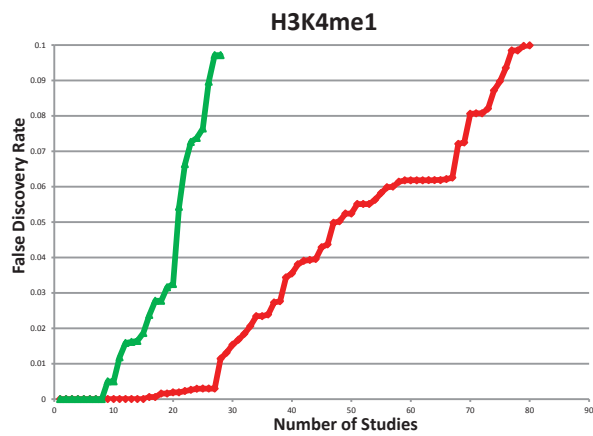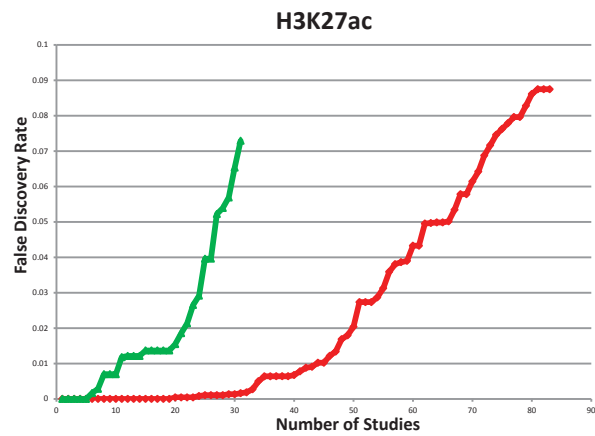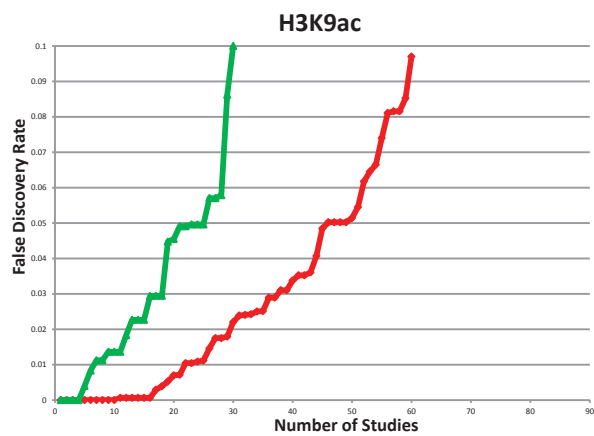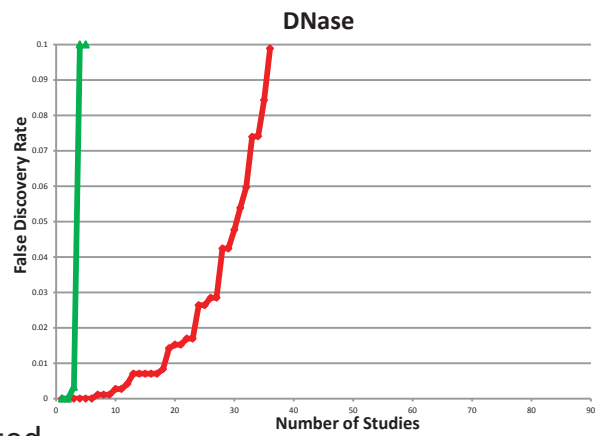

◆ Imputed

▲ Average Signal

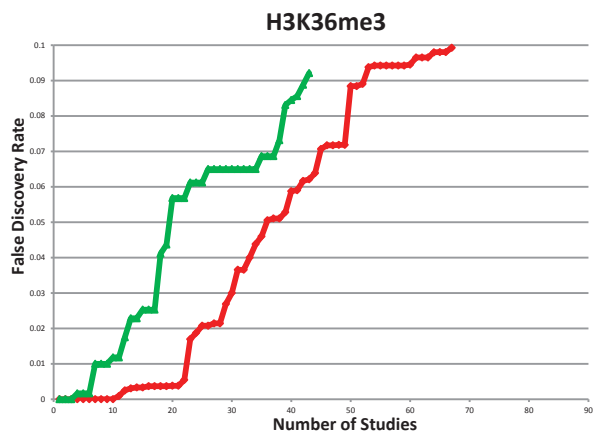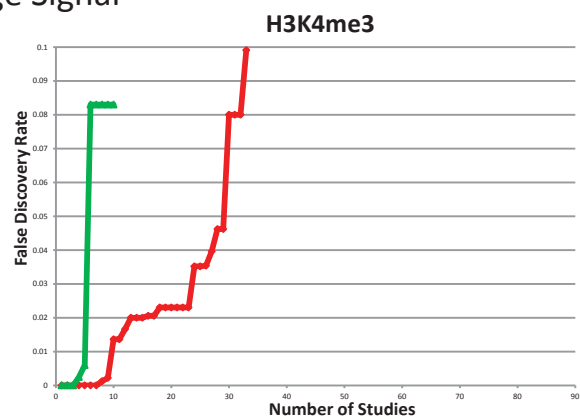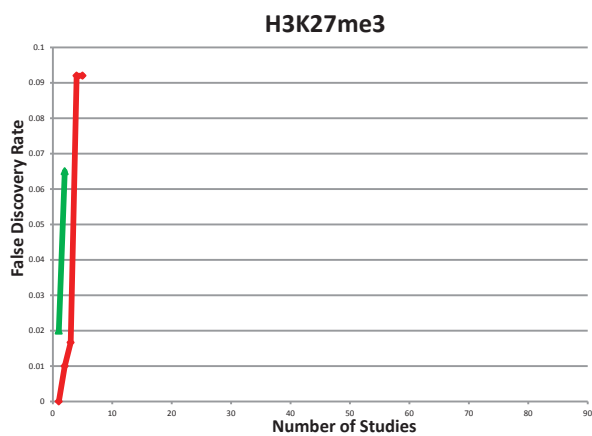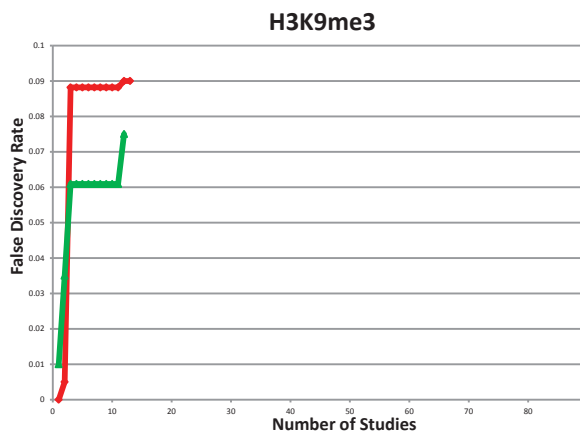

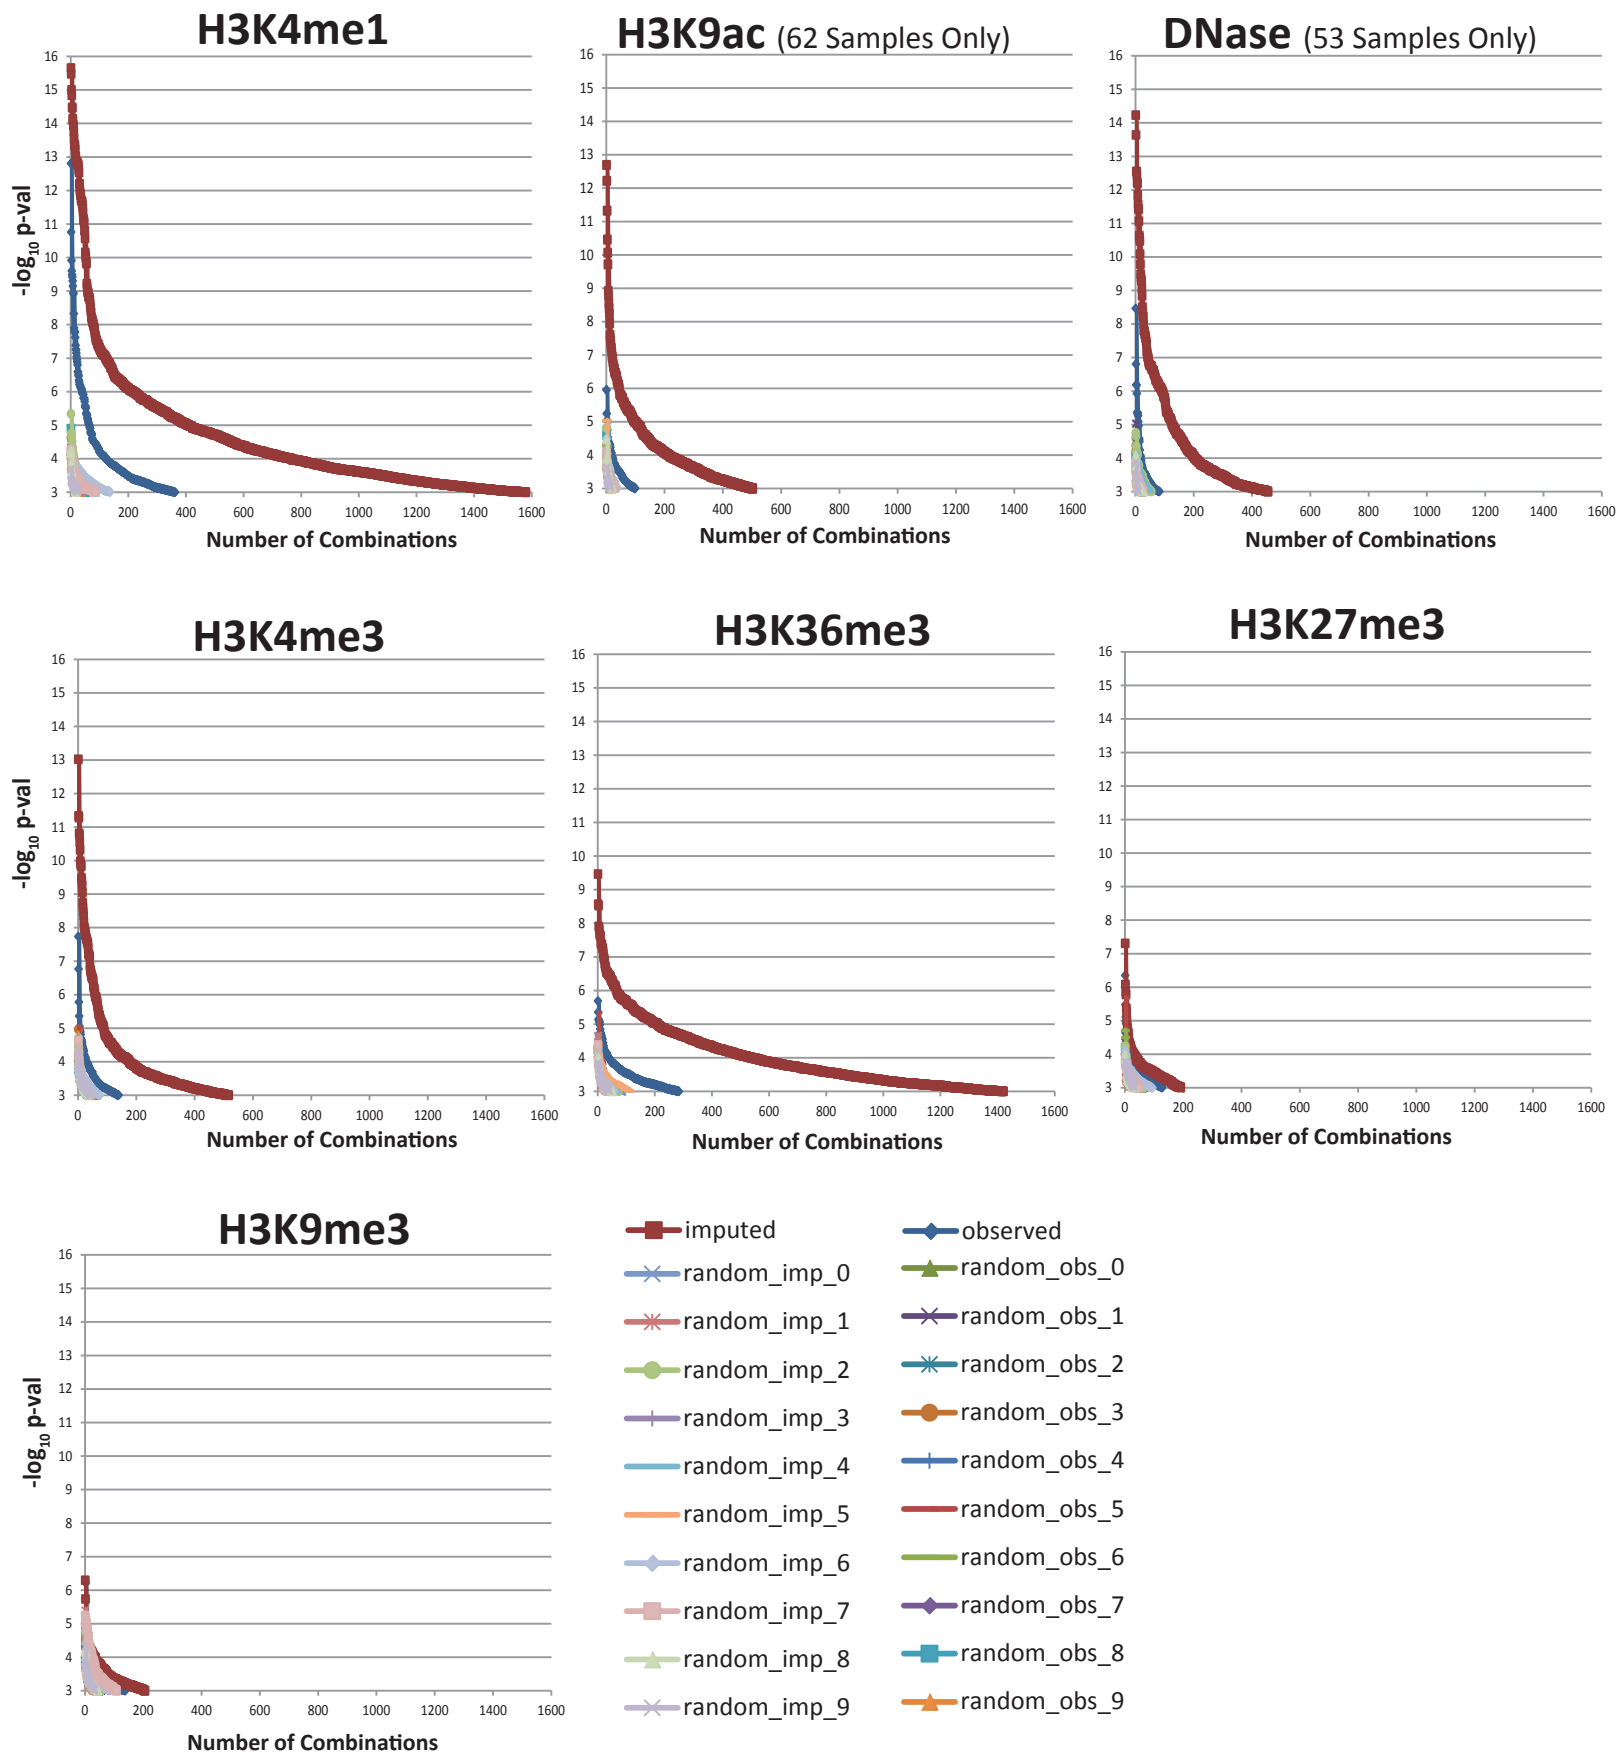

**Supplementary Figure 25:**

**Imputed and Observed Data Correspondence with GWAS – Sample-Study Combinations.**

The same as **Fig S24** except based on all combinations of studies and samples, and not just the most significant one per study. The x-axis shows the number of combinations that reached the significance level indicated on the y-axis. This is shown based on the imputed data and observed data with the actual GWAS catalog, along with the observed and imputed data based on ten randomizations of the GWAS catalog.



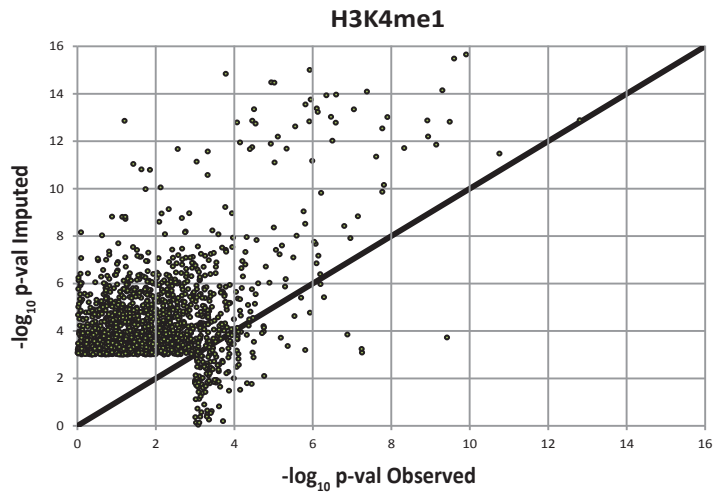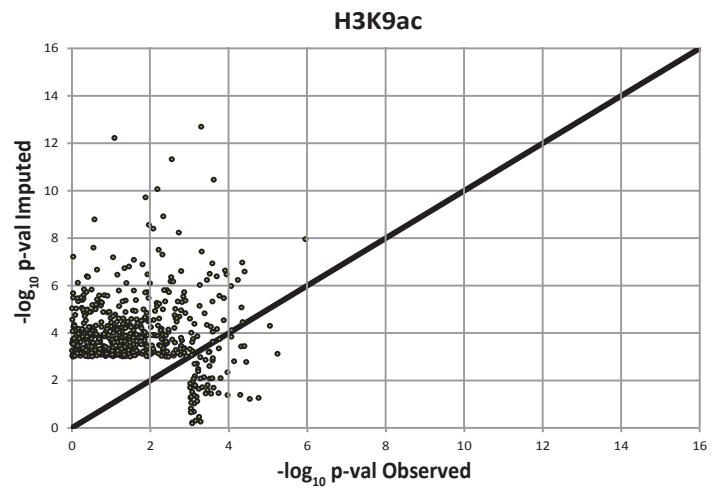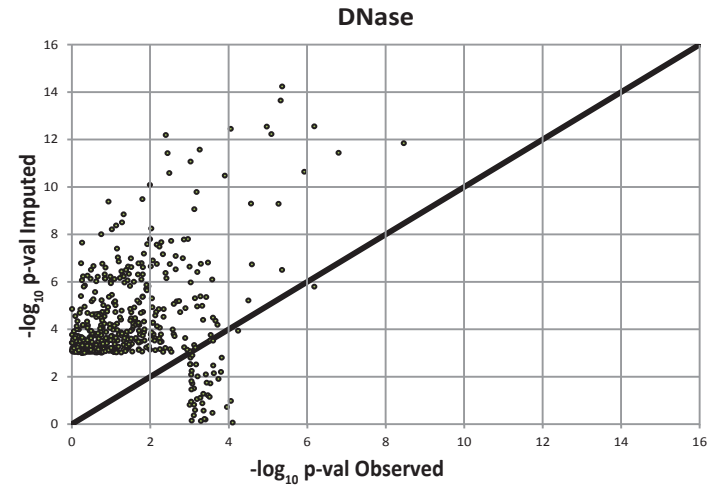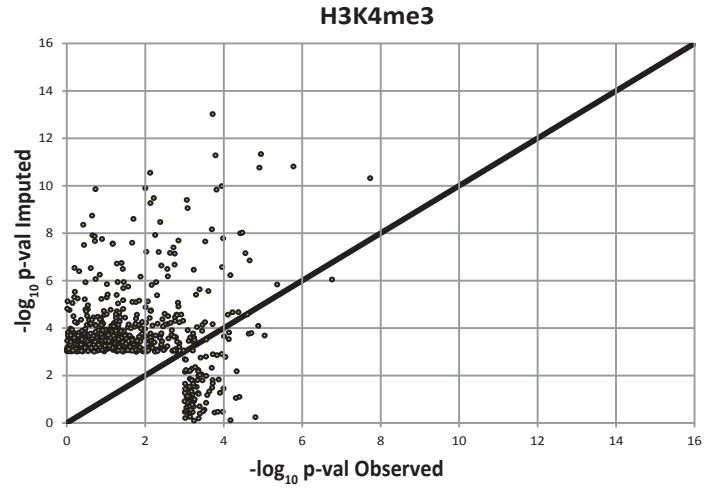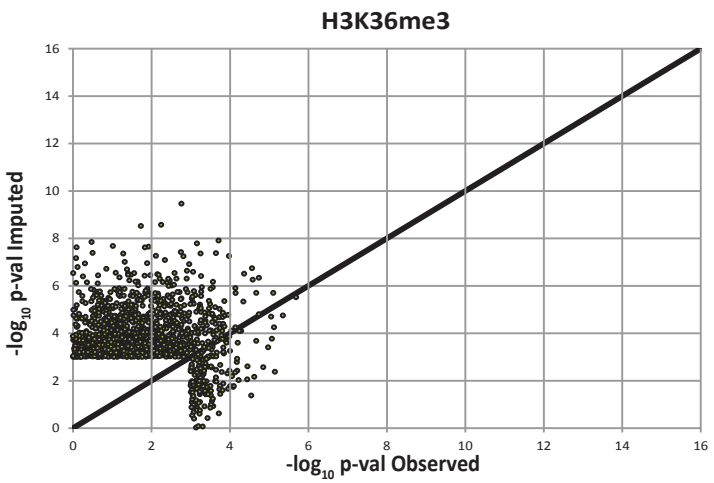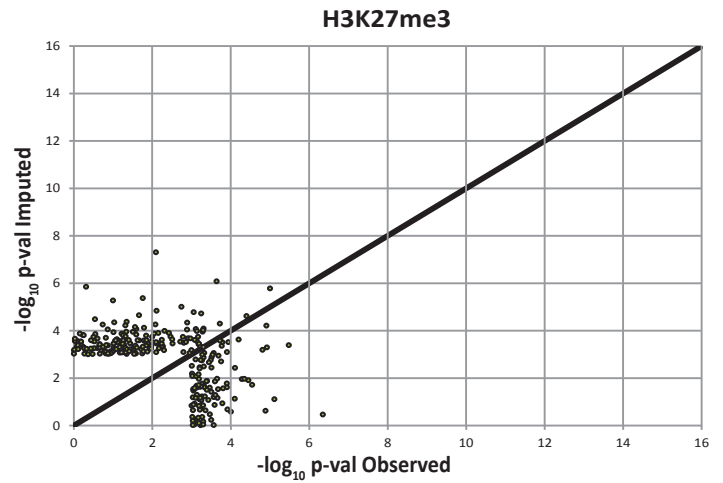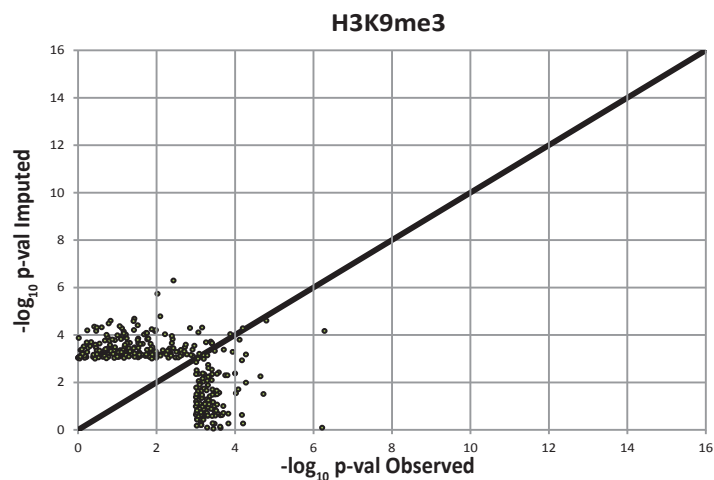

### Supplementary Figure 26:

#### Imputed-Observed Data GWAS Scatter Plots.

Similar to Fig. 4b except for the other Tier 1 marks. The plots are showing the  $-\log_{10}$  p-value computed for each study-sample combination based on the observed data (x-axis) and imputed data (y-axis) for each combination that had a p-value of  $10^{-3}$  or more significant based on either the imputed or the observed data. The diagonal line is the  $y=x$  line showing that most of the more significant study-sample combinations based on either the observed or imputed data are above it and thus have a more significant p-value based on the imputed data.

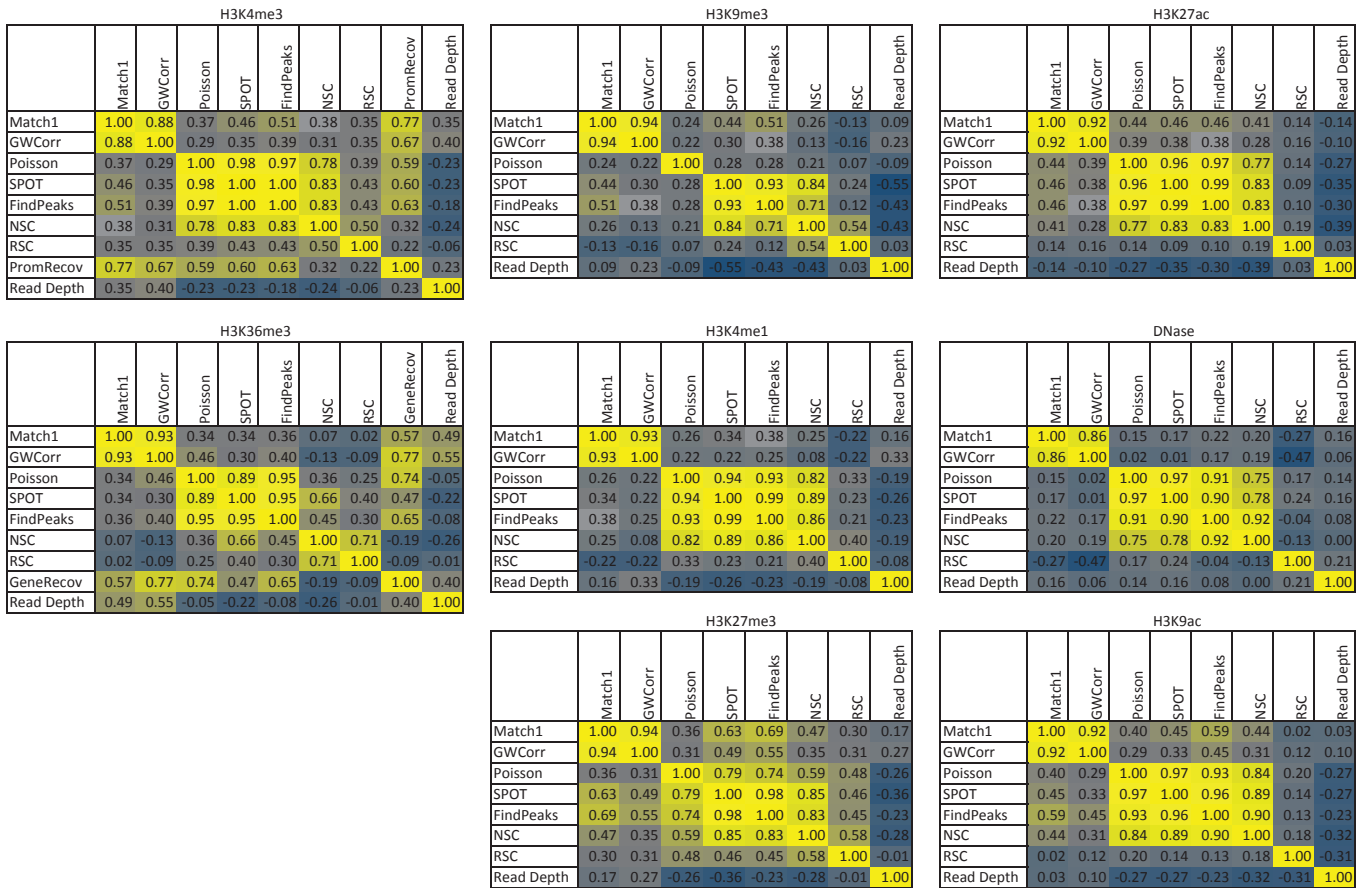

### Supplementary Figure 27: Quality Control (QC) Metric Correlations.

These tables show for each of the Tier-1 marks the Pearson correlation between all the general quality control measures evaluated. The table illustrates the two imputation based quality measures (Match 1, GWCorr) consistently correlate highly with each other, and to a lesser extent with the five non-imputation based general QC measures evaluated (SPOT, Poisson, FindPeaks, NSC, and RSC) along with read depth suggesting the imputation metrics could potentially provide additional unique information for quality control. For H3K36me3 and H3K4me3 the tables also contain correlations with a metric that leveraged relevant gene annotation information, AUC at a 5% false positive rate for recovering gene bodies (GeneRecov) and +/-2KB TSS regions (PromRecov) respectively, for which the imputation QC measures are among the best correlated.

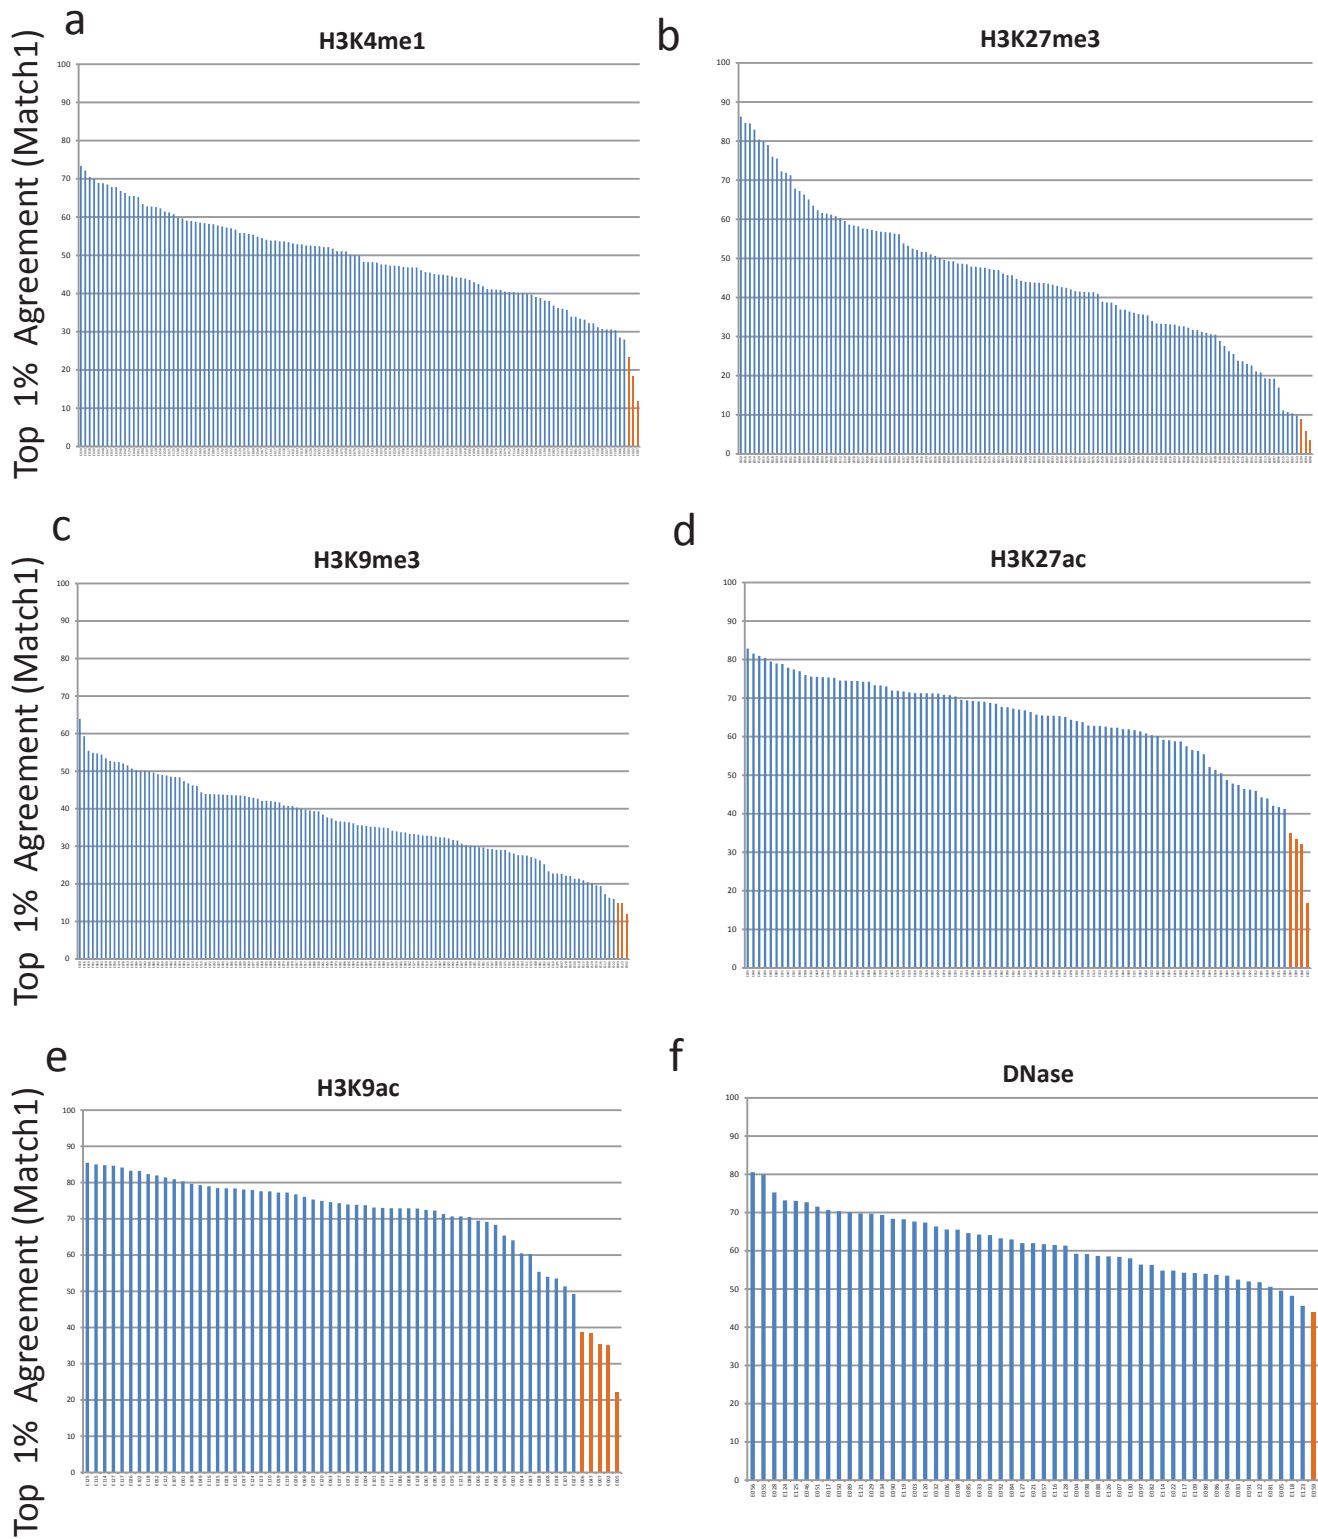

**Supplementary Figure 28: Distribution of Imputation Top 1% Agreement Scores.**

Similar to **Fig. 5b** except the figure shows the distribution across samples of top 1% signal location agreement percentages between the observed and corresponding imputed data for **(a)** H3K4me1 **(b)** H3K27me3 **(c)** H3K9me3 **(d)** H3K27ac **(e)** H3K9ac and **(f)** DNase. Shown in brown are observed datasets with an imputation agreement score more than two standard deviations below average for the mark. See also **Table S3** for the agreement scores and samples.

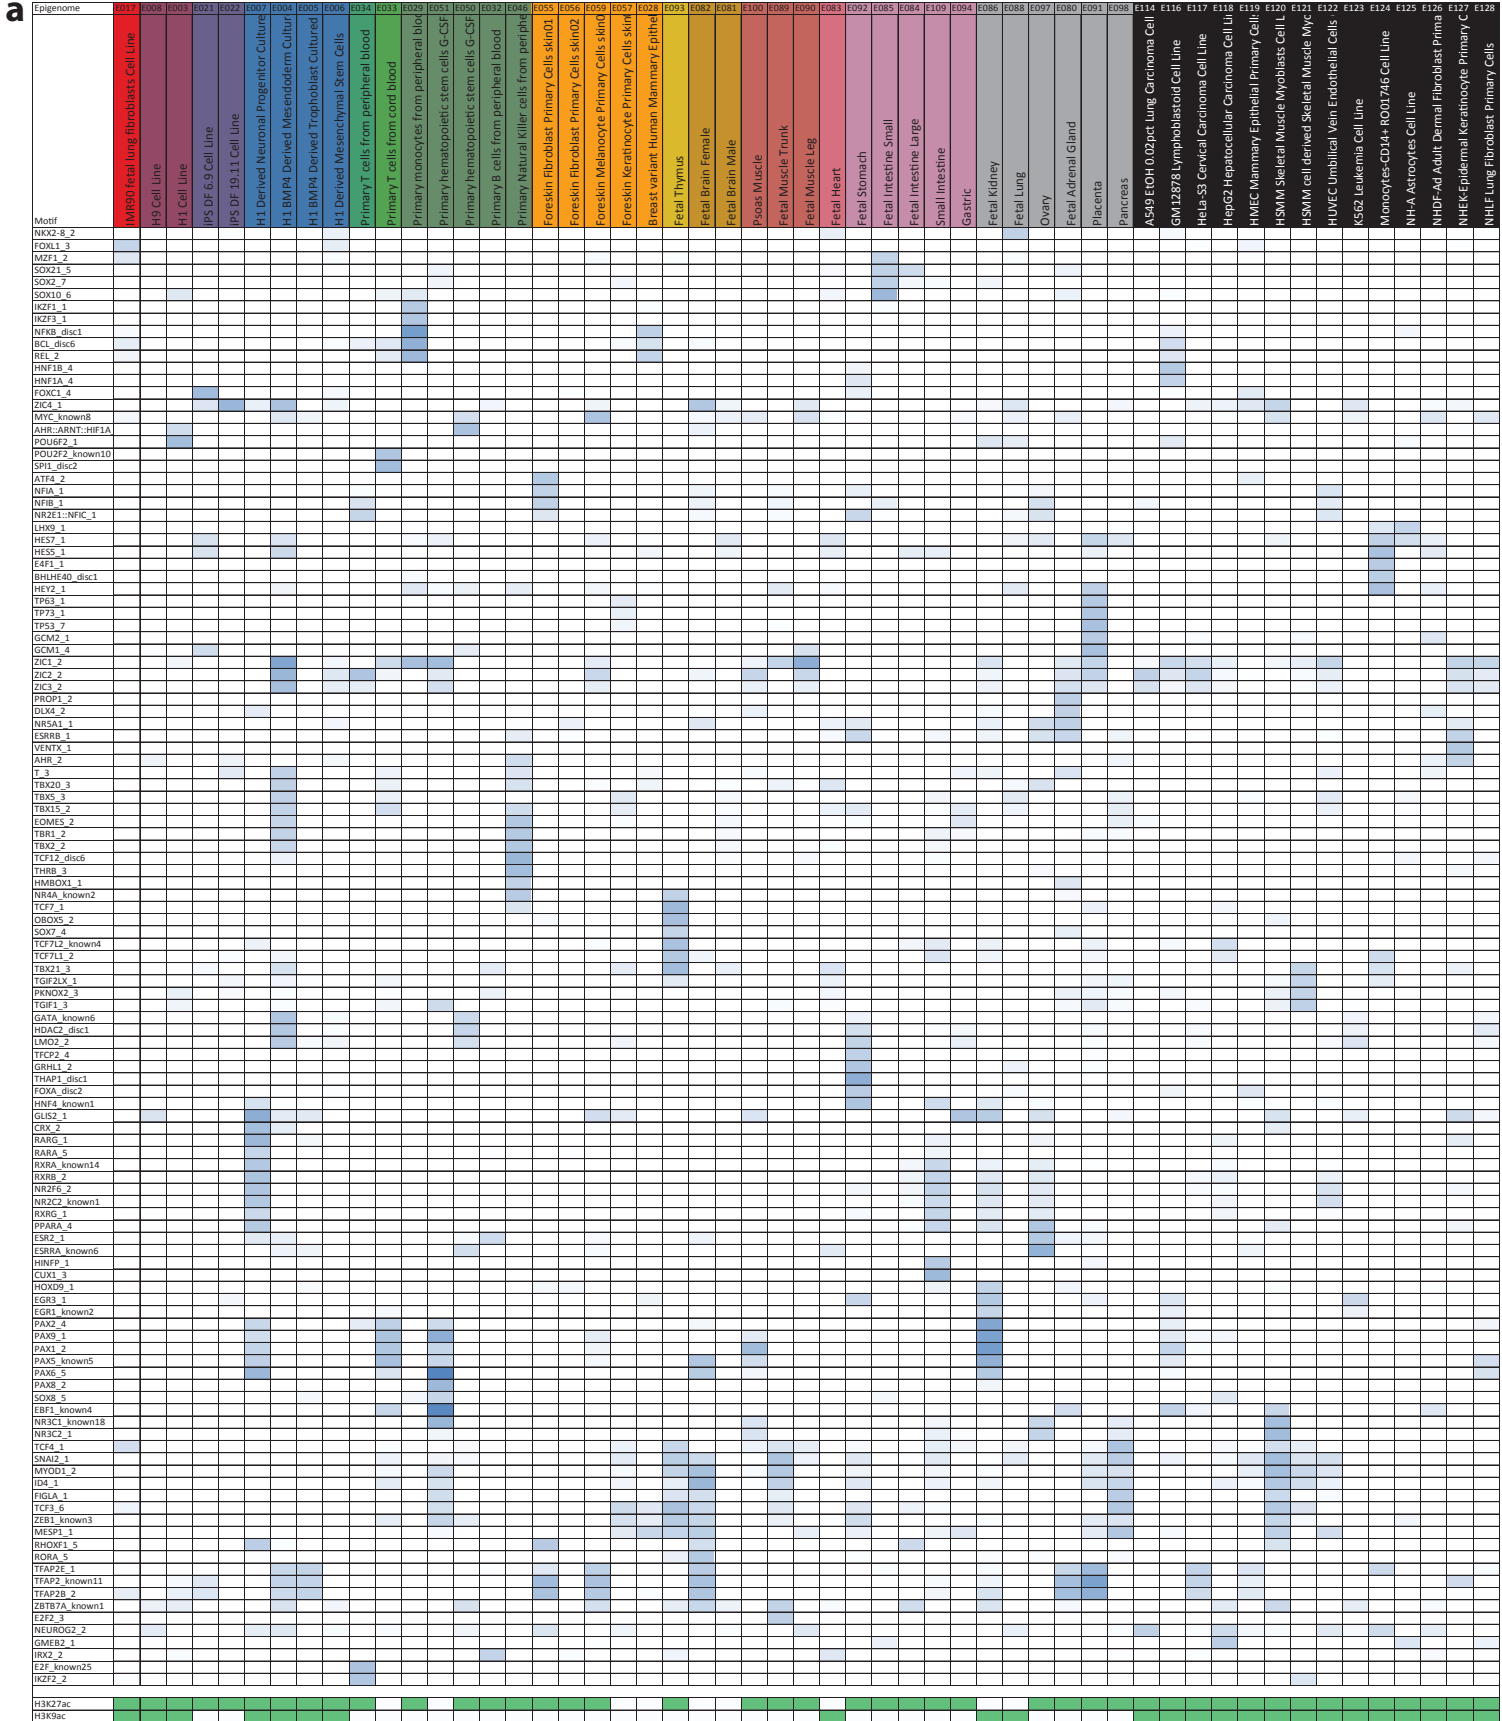

### Supplementary Figure 29: Motif Enrichments in Locations of Unexpected DNase signal.

(a) The heatmap shows sequence motif enrichments occurring in locations with unexpected DNase signal, which was defined here as places where the observed DNase signal was above 5, but the imputed signal was below 1. Motif enrichments are shown in  $\log_2$  relative to control as computed using a previous described motif enrichment program<sup>57</sup>. The background locations for computing the motif enrichments were locations that had an observed signal above 5. The rows correspond to different motifs, and columns different samples with observed DNase data available. Only motifs which had an enrichment value of at least 1 in at least one sample are shown. If multiple motifs corresponding to the same factor were available only the one with the maximum enrichment for any sample is shown. Along the bottom row is indicated which acetylations marks were available in the sample which could affect the expected signal. (b) The same heatmap as in a, but showing the motif enrichment for locations that had an observed signal above 5, used in the background for computing the enrichments in a, relative to a genomewide background.



# a Root position

| Main Imputation |                          |                          |                          | Imputation on Seven Deep Samples Only |                           |                           |                         |
|-----------------|--------------------------|--------------------------|--------------------------|---------------------------------------|---------------------------|---------------------------|-------------------------|
| Mark            | Feature #1               | Feature #2               | Feature #3               | Mark                                  | Feature #1                | Feature #2                | Feature #3              |
| H3K27me3        | KNN 10 by Global H3K4me1 | KNN 10 by Global H3K27ac | KNN 10 by Global H3K9ac  | H3K27me3                              | KNN 3 by Global H3K27ac   | KNN 2 by Global 2 H3K18ac | H3K4ac center           |
| H3K36me3        | KNN 10 by Global H3K4me1 | KNN 10 by Global H3K4me3 | KNN 9 by Global H3K4me3  | H3K36me3                              | H3K4me2 center            | KNN 4 by Global H3K27ac   | KNN 4 by Global H3K9me3 |
| H3K4me1         | KNN 10 by Local H3K27ac  | H3K27ac center           | KNN 10 by Local H3K9ac   | H3K4me1                               | H3K27ac center            | H3K18ac center            | H3K4me2 center          |
| H3K4me3         | KNN 5 by Global H3K4me1  | KNN 10 by Local H3K9ac   | KNN 3 by Global H3K4me1  | H3K4me3                               | KNN 3 by Local H3K4me2    | KNN 2 by Global DNase     | KNN 4 by Local H3K9ac   |
| H3K9me3         | KNN 10 by Global H3K4me1 | KNN 10 by Global H3K4me3 | KNN 10 by Global H3K27ac | H3K9me3                               | KNN 4 by Global H2BK120ac | KNN 4 by Global H3K27me3  | KNN 4 by Global H2AK5ac |
| H3K27ac         | KNN 2 Global H3K4me1     | H3K9ac center            | KNN 10 by Global H3K4me1 | H3K27ac                               | H2BK5ac center            | H4K5ac center             | KNN 3 by Local H2BK5ac  |
| H3K9ac          | H3K4me3 center           | KNN 5 by Local H3K27ac   | KNN 10 by Global H3K4me3 | H3K9ac                                | H3K4me3 center            | H3K18ac center            | H3K14ac center          |
| DNase           | KNN 1 by Global H3K4me3  | KNN 2 by Global H3K4me3  | KNN 5 by Global H3K4me1  | DNase                                 | KNN 2 by Global H2BK15ac  | KNN 2 by Global H4K91ac   | KNN 3 by Global H3K4me1 |
| H3K4me2         | H3K4me3 center           | KNN 7 by Local H3K4me3   | KNN 4 by Local H3K4me3   | H3K4me2                               | H3K4me3 center            | KNN 3 by Global H3K18ac   | KNN 4 by Local H3K9ac   |
| H2A.Z           | KNN 5 by Local H3K4me2   | KNN 7 by Global H3K27ac  | KNN 8 by Local H3K4me2   | H2A.Z                                 | H4K8ac center             | H3K4me2 center            | KNN 3 by Local H3K79me2 |
| H3K79me2        | KNN 5 by Local H3K36me3  | KNN 6 by Local H3K27ac   | KNN 3 by Global DNase    | H3K79me2                              | H4K20me1 center           | H3K4ac center             | KNN 4 by Global H3K18ac |
| H4K20me1        | H3K36me3 center          | KNN 10 by Global H3K4me1 | KNN 10 by Local H3K36me3 | H4K20me1                              | H3K79me1 center           | H3K79me2 center           | H4K8ac center           |
| H2AK5ac         | H3K18ac center           | H3K4me1 center           | H2BK12ac center          | H2AK5ac                               | H3K18ac center            | H2BK12ac center           | H2BK5ac center          |
| H2BK120ac       | H3K18ac center           | H3K27ac center           | H4K91ac center           | H2BK120ac                             | H3K18ac center            | H4K91ac center            | H2BK20ac center         |
| H2BK5ac         | H3K27ac center           | H4K5ac center            | H3K18ac center           | H2BK5ac                               | H3K27ac center            | H4K5ac center             | H3K18ac center          |
| H3K18ac         | H4K5ac center            | H3K14ac center           | H3K4ac center            | H3K18ac                               | H4K5ac center             | H3K14ac center            | H3K4ac center           |
| H3K23ac         | H3K14ac center           | H3K18ac center           | H4K5ac center            | H3K23ac                               | H3K14ac center            | H3K14ac center            | H4K5ac center           |
| H3K4ac          | H3K18ac center           | H3K9ac center            | H3K14ac center           | H3K4ac                                | H3K18ac center            | H3K14ac center            | H3K79me2 center         |
| H3K79me1        | H3K79me2 center          | KNN 4 by Global H3K9ac   | KNN 5 by Global H3K9ac   | H3K79me1                              | H3K79me2 center           | H3K14ac center            | H3K23ac center          |
| H4K8ac          | H4K5ac center            | H3K18ac center           | H3K9ac center            | H4K8ac                                | H4K5ac center             | H3K18ac center            | H3K14ac center          |
| H2BK12ac        | H3K18ac center           | KNN 4 by Global H3K4me1  | H4K91ac center           | H2BK12ac                              | H3K18ac center            | H4K91ac center            | H2BK120ac center        |
| H3K14ac         | H3K18ac center           | H3K27ac center           | H4K91ac center           | H3K14ac                               | H3K18ac center            | H4K91ac center            | H3K4ac center           |
| H4K91ac         | H3K18ac center           | H3K27ac center           | KNN 4 by Global H3K27ac  | H4K91ac                               | H3K18ac center            | H2BK12ac center           | H3K4ac center           |
| H2BK15ac        | H3K18ac center           | H2BK12ac center          | H3K27ac center           | H2BK15ac                              | H3K18ac center            | H2BK12ac center           | H2AK5ac center          |
| H3K9me1         | H2AK5ac center           | H3K4me1 center           | H4K20me1 center          | H3K9me1                               | H2AK5ac center            | H3K79me1 center           |                         |
| H2BK20ac        | H3K4me1 center           | H2BK12ac center          | H2BK120ac center         | H2BK20ac                              | H2BK12ac center           | H2BK120ac center          | H2BK15ac center         |
| H3K56ac         | H3K27ac center           | H4K8ac center            | H4K8ac center            | H3K56ac                               | H4K5ac center             | H4K8ac center             | H4K8ac center           |
| H4K5ac          | H3K27ac center           | H4K8ac center            | H3K9ac center            | H4K5ac                                | H4K8ac center             | H3K27ac center            |                         |
| H3K23me2        | H3K4me3 center           | H3K4me3 center           | H4K20me1 center          | H3K23me2                              | H3K4me3 center            | H3K4me3 center            | H3K56ac left 75         |
| H2AK9ac         | H2A.Z center             | H3K9ac center            | H3K27ac center           | H2AK9ac                               | H2A.Z center              | H3K9ac center             | H3K9ac right 25         |
| H3T11ph         | H3K4me1 center           | H2BK12ac center          | H3K18ac center           | H3T11ph                               | H2BK12ac center           | H3K18ac center            |                         |
| H4K12ac         | H4K8ac center            | H2A.Z center             | H3K4me3 center           | H4K12ac                               | H4K8ac center             |                           |                         |
| DNAMethyl       | KNN 4 by Global H3K4me1  | KNN 6 by Global DNase    | KNN 4 by Global H3K27ac  | DNAMethyl                             | KNN 4 by Global H3K23ac   | KNN 3 by Global H3K27ac   | KNN 3 by Global H3K9me3 |
| RNA-seq         | KNN 3 by Global H3K27ac  | KNN 5 by Global H3K9ac   | KNN 2 by Global H3K4me3  | RNA-seq                               | KNN 1 by Global H3K9ac    | KNN 2 by Global H3K4me3   | KNN 2 by Local H3K27ac  |

# b All positions

| Main Imputation |                        |                          |                          | Imputation on Seven Deep Samples Only |                        |                        |                      |
|-----------------|------------------------|--------------------------|--------------------------|---------------------------------------|------------------------|------------------------|----------------------|
| Mark            | Feature #1             | Feature #2               | Feature #3               | Mark                                  | Feature #1             | Feature #2             | Feature #3           |
| H3K27me3        | H3K9me3 center         | H3K36me3 center          | H3K4me3 center           | H3K27me3                              | H3K9me3 center         | H3K4me2 center         | H3K23ac center       |
| H3K36me3        | H3K9me3 center         | H3K27me3 center          | H3K4me3 center           | H3K36me3                              | H3K9me3 center         | H3K4me3 center         | H4K20me1 center      |
| H3K4me1         | H3K4me3 center         | H3K9ac center            | H3K9me3 center           | H3K4me1                               | H3K4me2 center         | H3K4me3 center         | H2A.Z center         |
| H3K4me3         | H3K9me3 center         | H3K9ac center            | H3K27me3 center          | H3K4me3                               | H3K9me3 center         | H3K9me3 center         | H3K36me3 center      |
| H3K9me3         | H3K36me3 center        | H3K27me3 center          | H3K4me3 center           | H3K9me3                               | H3K36me3 center        | H3K27me3 center        | H3K4me3 center       |
| H3K27ac         | H3K4me1 center         | H3K9me3 center           | H3K36me3 center          | H3K27ac                               | H3K4me2 center         | H2BK5ac center         | H3K23ac center       |
| H3K9ac          | H3K4me3 center         | H3K27ac center           | H3K4me1 center           | H3K9ac                                | H3K4me2 center         | H3K4me2 center         | H3K4me1 center       |
| DNase           | KNN 1 by Local H3K4me1 | KNN 1 by Local H3K9me3   | KNN 1 by Local H3K27me3  | DNase                                 | H3K9me3 left 7000      | KNN 1 by Local H3K27ac | H3K9me3 left 7500    |
| H3K4me2         | H3K4me3 center         | H3K4me1 center           | H3K9ac center            | H3K4me2                               | H3K9ac center          | H3K4me1 center         | H2BK5ac center       |
| H2A.Z           | H3K9me3 center         | H3K27me3 center          | H3K4me1 center           | H2A.Z                                 | H3K9me3 center         | H3K4me3 center         | H3K4me1 center       |
| H3K79me2        | H3K9me3 center         | H3K36me3 center          | H4K20me1 center          | H3K79me2                              | H4K20me1 center        | H2AK5ac center         | H3K9me3 center       |
| H4K20me1        | H3K36me3 center        | H3K9me3 center           | H3K27me3 center          | H4K20me1                              | H3K79me2 center        | H3K79me1 center        | H3K36me3 center      |
| H2AK5ac         | H3K9me1 center         | H3K9me3 center           | H4K20me1 center          | H2AK5ac                               | H2BK15ac center        | H2BK5ac center         | H3K79me2 center      |
| H2BK120ac       | H3K9me1 center         | H3K4me3 center           | H2A.Z center             | H2BK120ac                             | H2BK20ac center        | H2BK15ac center        | H3K4ac center        |
| H2BK5ac         | H3K27ac center         | H3K36me3 center          | H4K20me1 center          | H2BK5ac                               | H4K5ac center          | H3K4me2 center         | H3K27ac center       |
| H3K18ac         | H3K9me1 center         | H3K4me1 center           | H3K27ac center           | H3K18ac                               | H2BK120ac center       | H2BK15ac center        | H4K5ac center        |
| H3K23ac         | H3K9ac center          | H4K20me1 center          | H3K36me3 center          | H3K23ac                               | H4K20me1 center        | H3K56ac center         | H3K27me3 center      |
| H3K4ac          | H3K9me1 center         | H3K27ac center           | H3K4me1 center           | H3K4ac                                | H4K8ac center          | H4K91ac center         | H2BK120ac center     |
| H3K79me1        | H3K9me1 center         | H3K36me3 center          | H3K9me3 center           | H3K79me1                              | H4K20me1 center        | H3K79me2 center        | H3K36me3 center      |
| H4K8ac          | H2A.Z center           | H3K9me1 center           | H4K20me1 center          | H4K8ac                                | H2A.Z center           | H3K23ac center         | H3K56ac center       |
| H2BK12ac        | H3K9me3 center         | H3K27ac center           | H3K4me1 center           | H2BK12ac                              | H2BK20ac center        | H2AK5ac center         | H4K91ac center       |
| H3K14ac         | H3K4me1 center         | H3K9me3 center           | H3K27ac center           | H3K14ac                               | H2BK120ac center       | H2BK15ac center        | H3K18ac center       |
| H4K91ac         | H3K9me1 center         | H3K9me3 center           | H3K36me3 center          | H4K91ac                               | H2BK12ac center        | H2AK5ac center         | H2BK120ac center     |
| H2BK15ac        | H3K9me1 center         | H3K9me3 center           | H3K4me1 center           | H2BK15ac                              | H2BK120ac center       | H2BK120ac center       | H3K14ac center       |
| H3K9me1         | H3K79me1 center        | H2AK5ac center           | H3K9ac center            | H3K9me1                               | H3K79me2 center        | H3K79me1 center        | H2AK5ac center       |
| H2BK20ac        | H3K9me3 center         | H3K36me3 center          | H3K36me3 center          | H2BK20ac                              | H2BK120ac center       | H2BK12ac center        | H2AK5ac center       |
| H3K56ac         | H4K20me1 center        | H3K27ac center           | H3K9me3 center           | H3K56ac                               | H3K23ac center         | H4K20me1 center        | H4K20me1 center      |
| H4K5ac          | H3K27ac center         | H3K4me3 center           | H3K36me3 center          | H4K5ac                                | H2BK5ac center         | H3K27ac center         | H3K56ac center       |
| H3K23me2        | H3K9me3 center         | H2A.Z center             | H3K4me3 center           | H3K23me2                              | H3K56ac center         | H3K9me3 center         | H3K4me2 center       |
| H2AK9ac         | H3K9me3 center         | H3K36me3 center          | H3K27me3 center          | H2AK9ac                               | H3K9me3 center         | H3K36me3 center        | H3K9me3 right 25     |
| H3T11ph         | H3K27ac center         | H3K4me3 center           | H3K9ac center            | H3T11ph                               | H3K27ac center         | H3K79me2 center        | H2A.Z center         |
| H4K12ac         | H3K4me1 center         | H3K36me3 center          | H3K27ac center           | H4K12ac                               | H4K8ac center          | H3K9me3 center         | H3K4me3 center       |
| DNAMethyl       | KNN 2 Global H3K27ac   | KNN 2 by Global H3K27me3 | KNN 10 by Global H3K27ac | DNAMethyl                             | KNN 4 by Local H3K9me3 | KNN 2 by Local DNase   | KNN 3 by Local DNase |
| RNAseq          | H3K36me3 left 10000    | H3K36me3 right 5000      | H3K36me3 left 7000       | RNAseq                                | H3K36me3 left 3000     | H3K36me3 right 4000    | H3K36me3 right 9500  |

## Supplementary Figure 30: Top Used Features.

(a) (left) The table shows for imputing each mark in the main imputation the top three ranking features in terms of proportional usage as the root feature in the regression trees. Proportional usage in the root was determined as the fraction of times the feature was selected as the root feature for any regression tree built for the mark out of the number of times the feature was eligible for selection. The marks are color coded based on acetylation, methylation, or other. The features are color coded based on if it is the same mark in a sample determined based on local distance, based on global distance, or an acetylation, methylation, or other in the same sample. (right) The same as on the left but for the imputation restricted to the seven samples with deep mark coverage. (b) (left) The table shows for imputing each mark in the main imputation the top three ranking features in terms of proportional usage as a feature anywhere in the regression trees. Proportional usage here was determined as the fraction of times the feature was used at any split node in the tree out of the total number of split nodes for which the feature was eligible to be selected. The color coding was the same as in part a. (right) The same as on the left but for the imputation restricted to the seven samples with deep mark coverage.

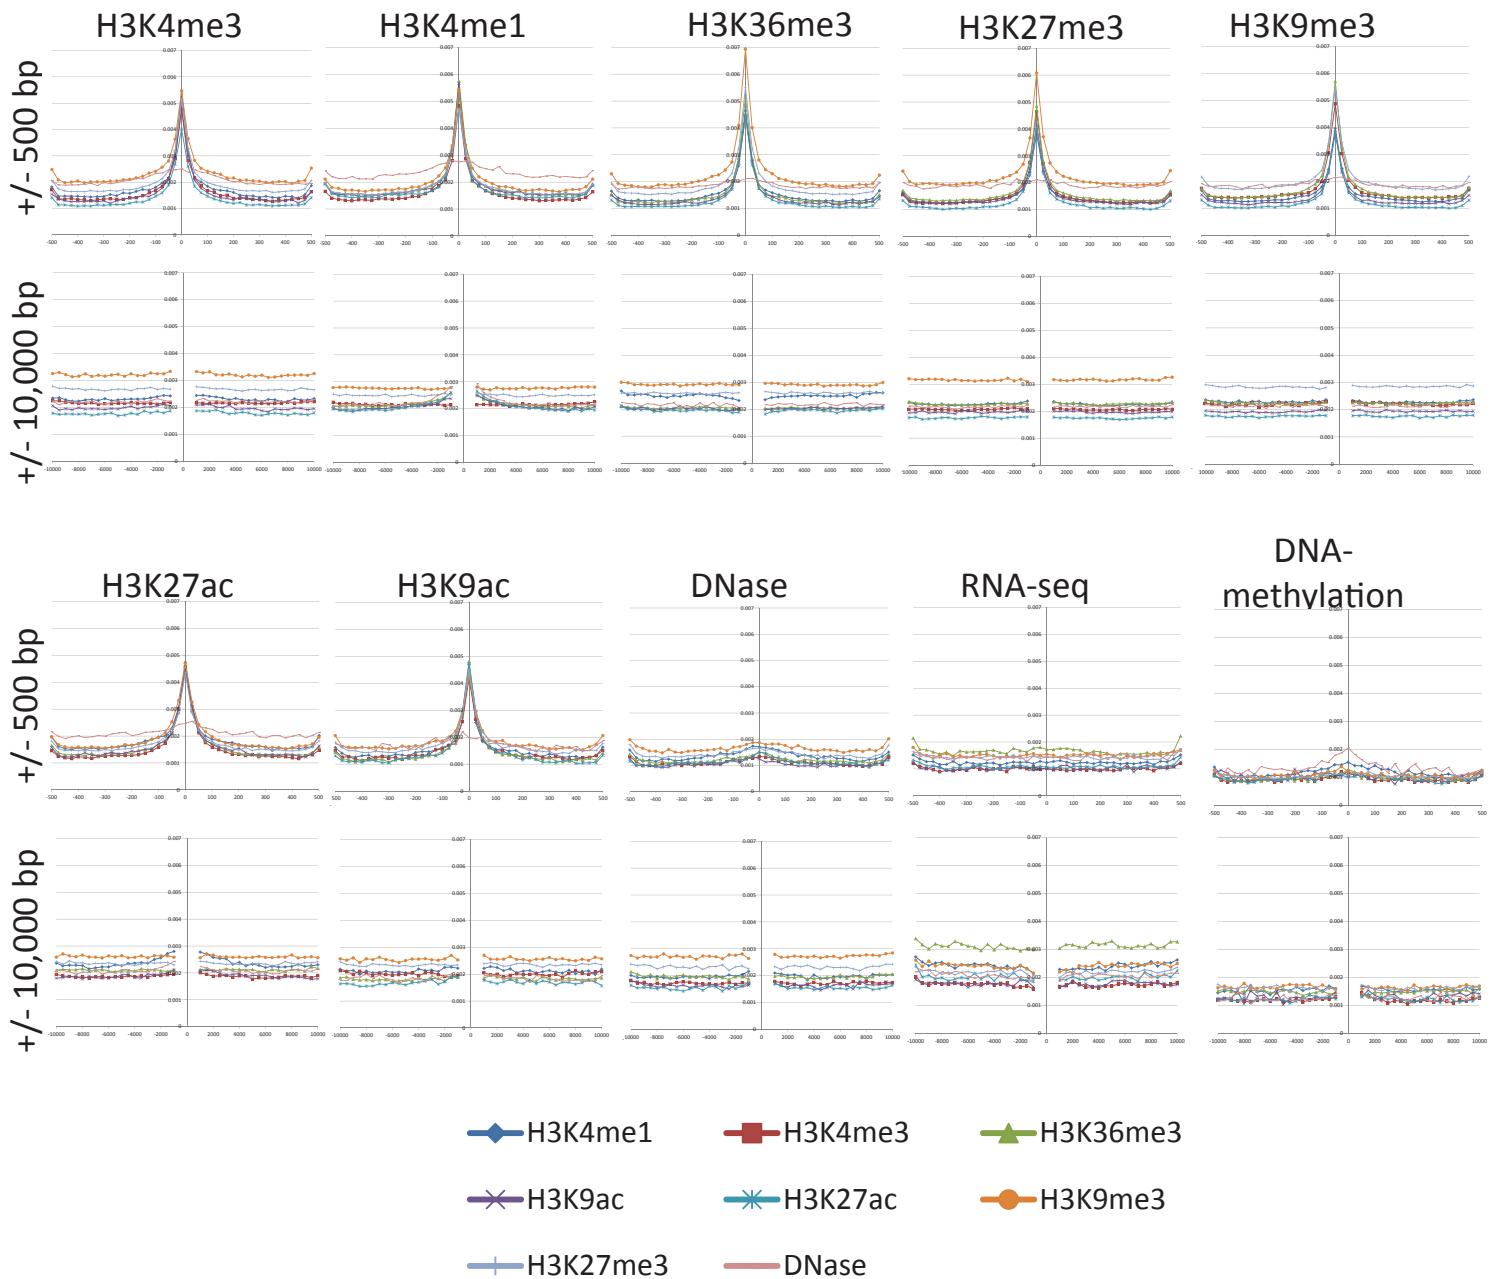

### Supplementary Figure 31: Feature Usage Relative to Position.

The figure displays for predicting each of the Tier-1 marks, RNA-seq, and DNA-methylation a plot showing the relative usage of Tier-1 mark signal features at each 25bp position within 500bp of the target position (x-axis) based on the proportion of times it was selected as a split feature in a node anywhere in the tree out of the number of times it was eligible for selection (y-axis), and then directly below that the same plot, but now showing features from 500bp up until 10kb spaced at 500 base pair intervals.



| a     |         |          |          |          |         |         |       |        |         |         |       |          | b                              |                                |                                  |
|-------|---------|----------|----------|----------|---------|---------|-------|--------|---------|---------|-------|----------|--------------------------------|--------------------------------|----------------------------------|
| state | H3K9me3 | H3K36me3 | H4K20me1 | H3K79me2 | H3K4me1 | H3K27ac | DNase | H3K9ac | H3K4me3 | H3K4me2 | H2A.Z | H3K27me3 | Average Genome % DNase Present | Average Genome % DNase Missing | Log <sub>2</sub> Present/Missing |
| 1     | 0.2     | 0.1      | 0.5      | 8.9      | 1.3     | 92.8    | 89.5  | 88.6   | 96.5    | 89.1    | 79.1  | 0.4      | 0.30                           | 0.41                           | -0.43                            |
| 2     | 0.3     | 0.7      | 2.5      | 12.5     | 96.1    | 99.1    | 78.1  | 86.2   | 95.6    | 99.9    | 74.7  | 0.7      | 0.23                           | 0.30                           | -0.38                            |
| 3     | 0.9     | 0.5      | 2.6      | 17.5     | 88.0    | 13.0    | 29.7  | 44.8   | 91.8    | 98.9    | 70.8  | 2.9      | 0.17                           | 0.19                           | -0.18                            |
| 4     | 3.9     | 9.6      | 10.2     | 98.6     | 23.2    | 92.9    | 55.6  | 97.9   | 99.6    | 96.4    | 68.2  | 12.3     | 0.17                           | 0.08                           | 1.02                             |
| 5     | 0.3     | 1.2      | 3.5      | 59.5     | 2.5     | 0.8     | 0.4   | 1.9    | 0.1     | 0.6     | 0.3   | 0.0      | 3.79                           | 3.77                           | 0.01                             |
| 6     | 0.2     | 33.6     | 37.7     | 82.2     | 0.8     | 0.9     | 0.6   | 0.8    | 0.1     | 0.5     | 0.1   | 0.1      | 2.00                           | 2.40                           | -0.26                            |
| 7     | 0.4     | 78.7     | 5.5      | 4.2      | 0.4     | 0.9     | 0.5   | 0.6    | 0.1     | 0.1     | 0.2   | 0.1      | 1.99                           | 2.05                           | -0.04                            |
| 8     | 0.3     | 7.3      | 1.7      | 2.2      | 0.2     | 0.1     | 0.2   | 0.1    | 0.0     | 0.1     | 0.1   | 0.0      | 6.53                           | 5.62                           | 0.22                             |
| 9     | 0.8     | 34.3     | 35.8     | 97.6     | 82.5    | 59.2    | 22.1  | 59.6   | 78.9    | 97.6    | 3.9   | 0.3      | 0.18                           | 0.09                           | 0.93                             |
| 10    | 1.0     | 75.9     | 38.9     | 64.8     | 58.1    | 37.0    | 14.5  | 11.9   | 2.6     | 14.7    | 2.9   | 0.6      | 0.36                           | 0.28                           | 0.36                             |
| 11    | 0.4     | 5.1      | 25.3     | 89.1     | 69.7    | 10.7    | 9.6   | 6.0    | 1.4     | 29.1    | 2.6   | 0.1      | 0.75                           | 0.83                           | -0.14                            |
| 12    | 0.6     | 2.5      | 2.6      | 12.0     | 91.0    | 95.4    | 47.7  | 41.5   | 6.1     | 63.1    | 29.9  | 0.4      | 0.55                           | 0.56                           | -0.01                            |
| 13    | 0.5     | 0.1      | 2.0      | 0.5      | 89.0    | 26.8    | 64.7  | 7.4    | 7.4     | 67.6    | 47.1  | 0.8      | 0.40                           | 0.24                           | 0.72                             |
| 14    | 0.4     | 0.3      | 1.3      | 1.8      | 59.2    | 1.9     | 1.6   | 0.8    | 0.2     | 7.7     | 5.6   | 1.1      | 1.08                           | 0.99                           | 0.12                             |
| 15    | 1.4     | 0.6      | 0.3      | 1.2      | 13.2    | 3.7     | 1.8   | 4.5    | 1.8     | 9.6     | 56.5  | 1.7      | 0.39                           | 0.25                           | 0.64                             |
| 16    | 0.5     | 1.0      | 0.5      | 2.8      | 18.1    | 58.1    | 30.7  | 5.6    | 0.9     | 9.7     | 2.4   | 0.4      | 0.52                           | 0.62                           | -0.26                            |
| 17    | 0.5     | 0.2      | 1.5      | 0.2      | 10.2    | 1.8     | 94.5  | 0.7    | 0.2     | 5.5     | 9.4   | 0.7      | 0.66                           | 0.01                           | 6.06                             |
| 18    | 67.4    | 60.5     | 7.5      | 29.7     | 2.1     | 1.5     | 2.3   | 2.0    | 9.1     | 2.3     | 2.2   | 2.3      | 0.22                           | 0.22                           | -0.02                            |
| 19    | 59.1    | 0.8      | 0.2      | 0.4      | 0.3     | 0.2     | 0.7   | 0.3    | 1.3     | 0.4     | 1.3   | 2.1      | 1.34                           | 1.17                           | 0.19                             |
| 20    | 5.1     | 0.0      | 0.0      | 0.0      | 0.0     | 0.0     | 0.0   | 0.1    | 0.1     | 0.1     | 0.1   | 0.1      | 7.63                           | 6.38                           | 0.26                             |
| 21    | 0.6     | 0.4      | 0.7      | 7.9      | 3.3     | 6.2     | 45.5  | 33.4   | 77.5    | 82.8    | 42.8  | 1.4      | 0.25                           | 0.28                           | -0.13                            |
| 22    | 4.1     | 1.4      | 7.4      | 1.7      | 54.9    | 6.1     | 31.8  | 17.1   | 43.9    | 78.5    | 40.3  | 84.7     | 0.30                           | 0.23                           | 0.38                             |
| 23    | 1.5     | 0.2      | 2.0      | 0.0      | 0.6     | 0.2     | 0.5   | 0.2    | 0.1     | 0.3     | 1.1   | 45.8     | 2.75                           | 1.97                           | 0.48                             |
| 24    | 0.3     | 0.1      | 0.2      | 0.1      | 0.0     | 0.1     | 0.0   | 0.2    | 0.0     | 0.1     | 0.7   | 1.1      | 33.42                          | 30.69                          | 0.12                             |
| 25    | 0.3     | 0.0      | 0.0      | 0.0      | 0.0     | 0.0     | 0.0   | 0.0    | 0.0     | 0.0     | 0.1   | 0.1      | 34.03                          | 40.36                          | -0.25                            |

**Supplementary Figure 32: Chromatin State Model with 12-Marks Using Observed Data.**

(a) The emission parameters for a chromatin state model learned directly on the Tier-1 and 2 observed data across 127 samples after applying the ChromHMM default binarization and treating as missing cases in which a mark was not available in a sample. (b) The first columns show the average percent of the genome assigned to each state for samples where DNase is present, the next column when DNase is absent, and the last column shows the log base two of the ratio between these two columns. This demonstrates that the percentage of the genome assigned to a state associated with DNase (State 17) is highly dependent on whether DNase data was available in the sample.

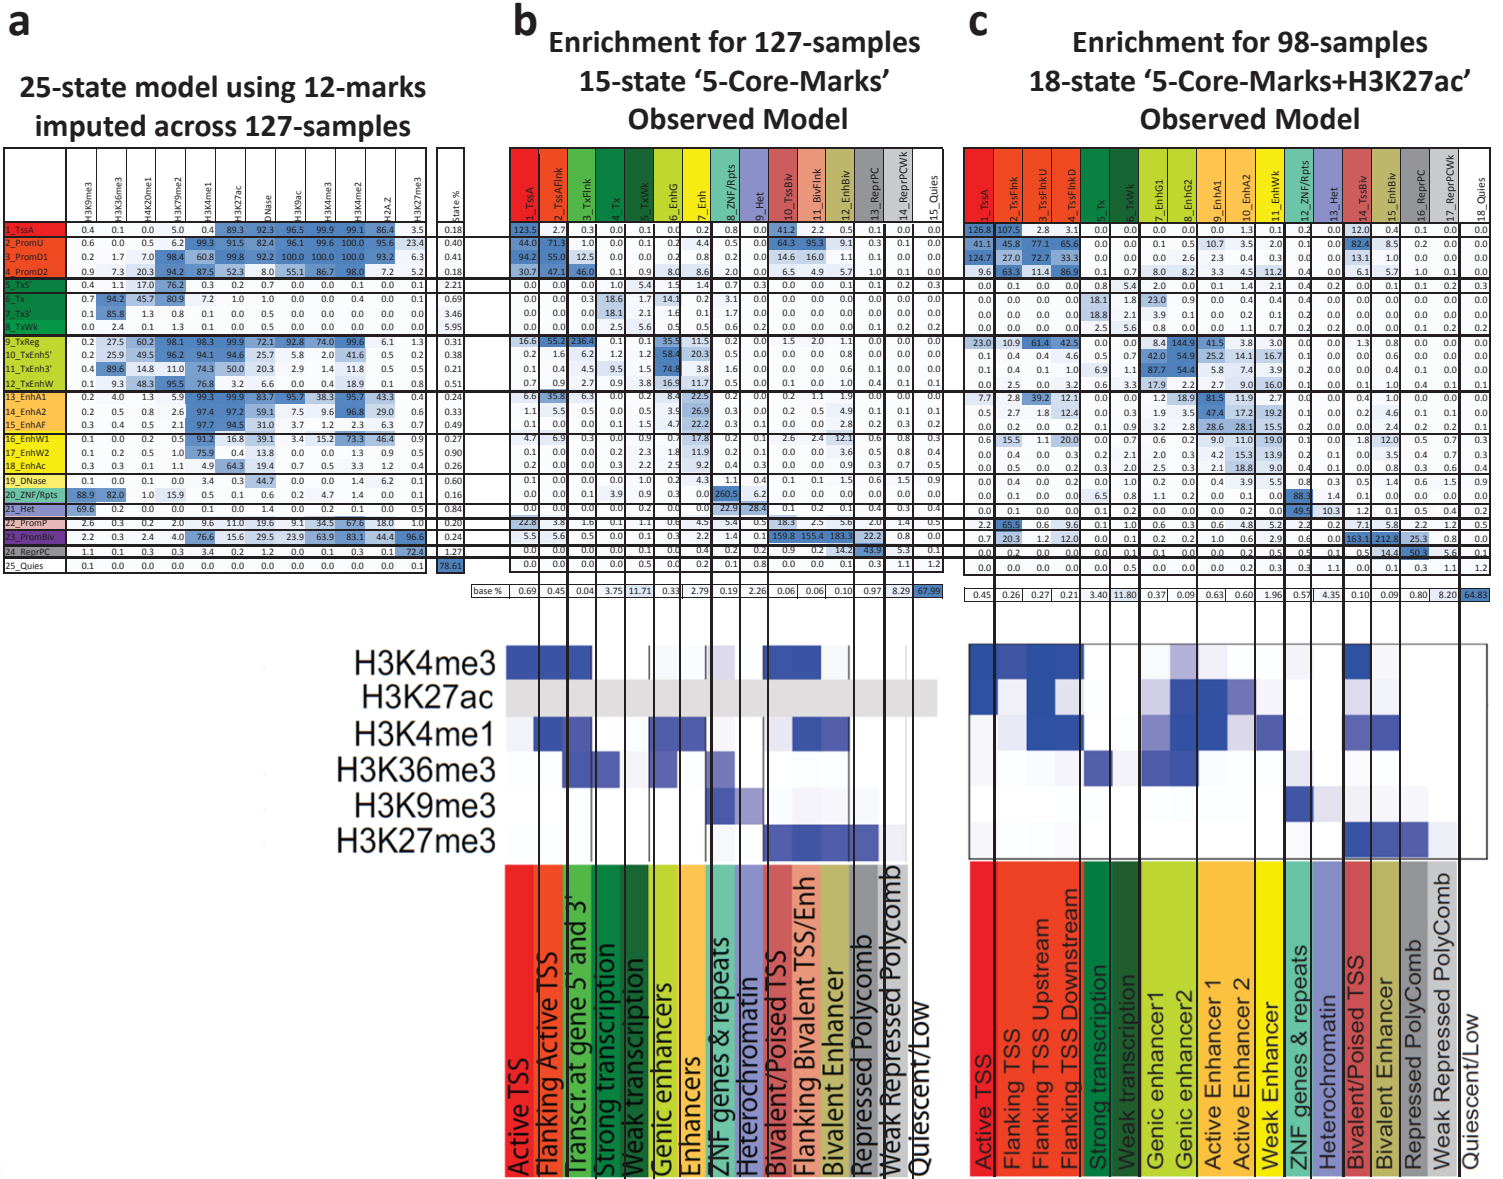

**d**

|             | Genome % | CG hg19 | Exons.Gencodev10.hg19 | Genes.Gencodev10.hg19 | Introns.Gencodev10.hg19 | TSS.Gencodev10.hg19 | TSS_2kbp.Gencodev10.hg19 | TSS.Gencodev10.hg19 | TSS_2kbp.Gencodev10.hg19 | ZNF_genes | Conserved | DNA Methylation Observed | DNA Methylation Imputed | RNA-seq Observed | RNA-seq Imputed |
|-------------|----------|---------|-----------------------|-----------------------|-------------------------|---------------------|--------------------------|---------------------|--------------------------|-----------|-----------|--------------------------|-------------------------|------------------|-----------------|
| 1_TssA      | 0.18     | 97.6    | 10.1                  | 1.3                   | 0.6                     | 3.5                 | 2.5                      | 96.9                | 9.4                      | 3.6       | 5.9       | 0.03                     | 0.13                    | 0.6              | 0.7             |
| 2_PromU     | 0.41     | 36.5    | 4.7                   | 1.1                   | 0.8                     | 2.9                 | 2.4                      | 16.1                | 7.2                      | 1.9       | 3.5       | 0.11                     | 0.20                    | 0.4              | 0.4             |
| 3_PromD1    | 0.41     | 55.2    | 8.5                   | 1.8                   | 1.3                     | 3.6                 | 2.7                      | 36.6                | 9.7                      | 4.3       | 4.9       | 0.04                     | 0.13                    | 1.1              | 1.2             |
| 4_PromD2    | 0.19     | 2.3     | 3.4                   | 1.9                   | 1.8                     | 3.2                 | 2.5                      | 2.5                 | 8.0                      | 4.7       | 2.2       | 0.62                     | 0.63                    | 0.7              | 0.8             |
| 5_Tss       | 2.22     | 0.1     | 0.6                   | 2.0                   | 2.1                     | 0.7                 | 0.9                      | 0.6                 | 1.2                      | 2.4       | 0.7       | 0.90                     | 0.89                    | 0.3              | 0.4             |
| 6_Tss       | 0.70     | 1.3     | 5.2                   | 2.0                   | 1.7                     | 6.0                 | 3.8                      | 2.5                 | 2.8                      | 3.3       | 2.5       | 0.91                     | 0.89                    | 1.2              | 1.3             |
| 7_Tss       | 3.48     | 1.0     | 5.6                   | 1.9                   | 1.7                     | 5.9                 | 4.3                      | 2.0                 | 2.6                      | 2.8       | 2.5       | 0.92                     | 0.91                    | 1.0              | 1.1             |
| 8_TssW      | 5.88     | 0.3     | 1.9                   | 1.9                   | 1.9                     | 1.7                 | 2.1                      | 0.8                 | 1.5                      | 2.4       | 1.1       | 0.90                     | 0.89                    | 0.4              | 0.5             |
| 9_TxReg     | 0.30     | 2.8     | 4.0                   | 1.9                   | 1.8                     | 4.2                 | 2.6                      | 3.9                 | 5.1                      | 1.4       | 3.3       | 0.45                     | 0.52                    | 1.2              | 1.2             |
| 10_TxEnh3'  | 0.38     | 0.4     | 1.8                   | 2.0                   | 2.0                     | 2.0                 | 1.5                      | 1.5                 | 2.0                      | 1.4       | 2.0       | 0.76                     | 0.76                    | 0.6              | 0.8             |
| 11_TxEnh3'  | 0.21     | 1.2     | 7.2                   | 1.9                   | 1.5                     | 7.3                 | 4.8                      | 2.7                 | 3.0                      | 1.3       | 3.4       | 0.80                     | 0.80                    | 1.4              | 1.5             |
| 12_TxEnhW   | 0.51     | 0.3     | 1.2                   | 2.0                   | 2.0                     | 1.2                 | 1.2                      | 1.1                 | 2.3                      | 2.1       | 1.4       | 0.82                     | 0.81                    | 0.4              | 0.6             |
| 13_EnhA1    | 0.22     | 0.9     | 2.2                   | 1.3                   | 1.2                     | 1.9                 | 1.8                      | 2.8                 | 2.5                      | 0.8       | 2.9       | 0.46                     | 0.56                    | 0.5              | 0.5             |
| 14_EnhA2    | 0.34     | 0.4     | 1.4                   | 1.2                   | 1.2                     | 1.3                 | 1.3                      | 1.8                 | 2.0                      | 0.8       | 3.0       | 0.54                     | 0.61                    | 0.2              | 0.3             |
| 15_EnhAF    | 0.48     | 0.2     | 1.3                   | 1.2                   | 1.2                     | 1.2                 | 1.3                      | 1.1                 | 1.6                      | 0.7       | 2.0       | 0.68                     | 0.73                    | 0.2              | 0.3             |
| 16_EnhW1    | 0.28     | 1.8     | 1.7                   | 1.0                   | 0.9                     | 1.6                 | 1.4                      | 3.0                 | 3.0                      | 1.0       | 2.5       | 0.52                     | 0.54                    | 0.1              | 0.2             |
| 17_EnhW2    | 0.95     | 0.3     | 1.2                   | 1.2                   | 1.3                     | 1.2                 | 1.2                      | 1.0                 | 1.5                      | 0.8       | 2.1       | 0.74                     | 0.75                    | 0.2              | 0.3             |
| 18_EnhAc    | 0.27     | 0.2     | 1.1                   | 1.2                   | 1.2                     | 1.0                 | 1.2                      | 1.3                 | 1.6                      | 0.7       | 1.9       | 0.75                     | 0.78                    | 0.2              | 0.3             |
| 19_DNase    | 0.63     | 0.4     | 0.9                   | 0.9                   | 0.9                     | 1.0                 | 1.0                      | 1.7                 | 1.2                      | 0.5       | 2.7       | 0.57                     | 0.58                    | 0.1              | 0.1             |
| 20_ZNF/Rpts | 0.18     | 0.7     | 5.0                   | 1.9                   | 1.6                     | 4.0                 | 3.3                      | 1.0                 | 1.5                      | 71.8      | 1.0       | 0.93                     | 0.91                    | 0.7              | 0.9             |
| 21_Het      | 0.91     | 0.9     | 1.0                   | 0.7                   | 0.7                     | 0.9                 | 0.8                      | 0.5                 | 0.8                      | 7.7       | 0.2       | 0.81                     | 0.79                    | 0.1              | 0.1             |
| 22_PromP    | 0.20     | 14.2    | 3.0                   | 1.2                   | 1.1                     | 2.2                 | 1.8                      | 10.5                | 5.0                      | 1.5       | 2.6       | 0.39                     | 0.43                    | 0.2              | 0.3             |
| 23_PromBiv  | 0.25     | 53.5    | 5.9                   | 1.3                   | 1.0                     | 3.7                 | 2.6                      | 13.0                | 6.8                      | 0.7       | 4.5       | 1.16                     | 1.22                    | 0.2              | 0.3             |
| 24_ReprPC   | 1.32     | 4.9     | 2.0                   | 1.0                   | 0.9                     | 1.7                 | 1.7                      | 1.7                 | 2.8                      | 0.5       | 1.9       | 0.63                     | 0.62                    | 0.1              | 0.1             |
| 25_Quies    | 0.1      | 0.0     | 0.0                   | 0.0                   | 0.0                     | 0.0                 | 0.0                      | 0.0                 | 0.1                      | 78.8      | 0.0       | 0.0                      | 0.0                     | 0.0              | 0.1             |

**Supplementary Figure 33: Enrichments of 12-mark Imputation Based Chromatin State Model.**

**(a)** The emission parameters for the 25-state imputation based model followed by the median percent of the genome across samples assigned to each state. **(b)** The median enrichments of the state assignments of the imputed data based model for the state assignments of a 15-state model based on observed data for five core marks (H3K4me1, H3K4me3, H3K9me3, H3K27me3, H3K36me3) from (Roadmap Epigenomics Consortium et al, 2015)<sup>10</sup>. The bottom row shows the median state assignment percentages. Below it is a heatmap of the emission parameters and state descriptions from (Roadmap Epigenomics Consortium et al, 2015)<sup>10</sup>. H3K27ac was not used in this model and is grayed out in the heatmap. **(c)** Similar to **b** except comparing state assignments of the imputation model for the state assignments of a 18-state model based on the core marks plus H3K27ac restricted to the 98 samples in which it was defined, also from (Roadmap Epigenomics Consortium et al, 2015)<sup>10</sup>. **(d)** Median state overlaps from Fig. 6c here with numeric details. All values are fold enrichments except the column after the state label is genome % and the last four columns report average signal values for observed and imputed DNA-methylation at CGs or RNA-seq data as indicated.

**a** 12-mark Imputed Model State Assignment Range

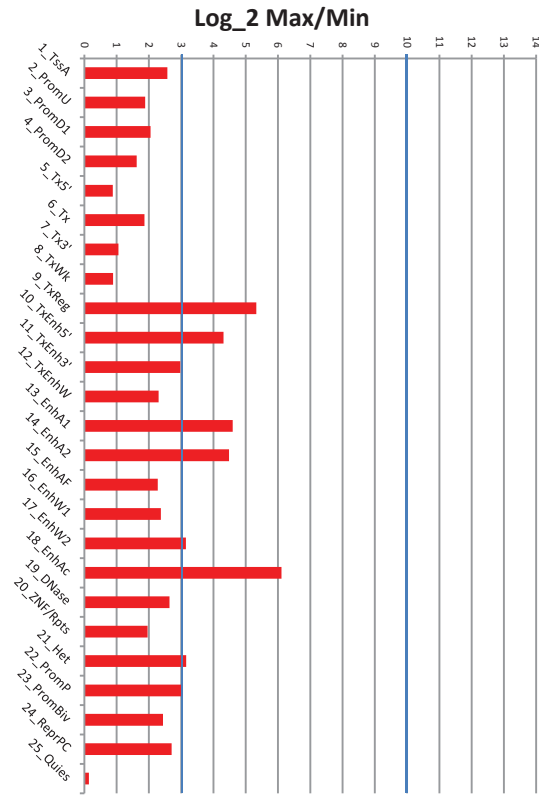

**b** 12-mark Observed with Missing Data Model State Assignment Range

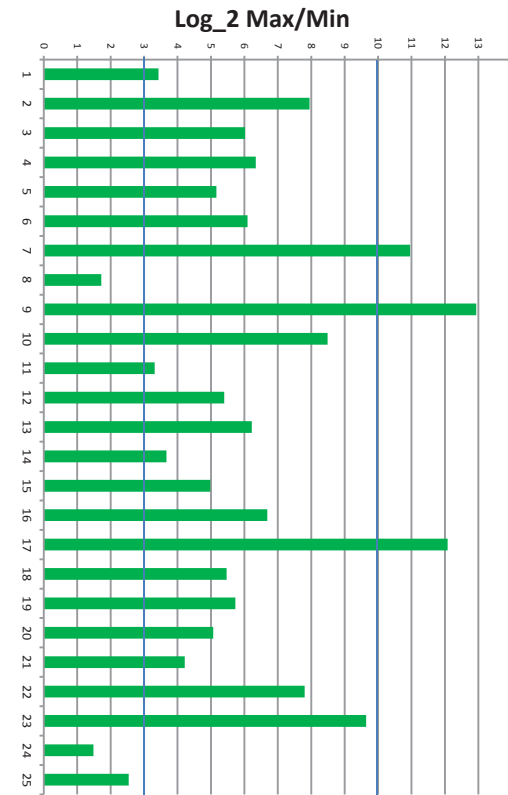

**c** 5-mark Observed Model State Assignment Range

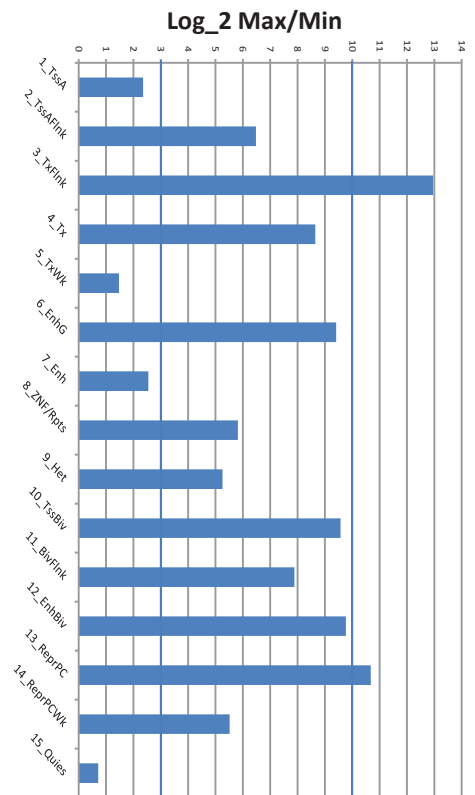

**Supplementary Figure 34: Comparison of Chromatin State Model State Assignment Coverage Ranges.**

The graphs show for three different models and each state the range of percentage of the genome assigned to each state in terms of log base two ratio of the maximum genome percentage for any sample divided by the minimum genome percentage. The three models are (a) 25-state imputation based model based on the 12 Tier-1 and 2 marks. (b) 25-state observed data model based on the 12 Tier-1 and 2 marks treating marks as missing data for some samples (Fig. S32). (c) 15-state observed data model based on 5-core marks mapped in every sample<sup>10</sup> (also see Fig. S33 for emission parameters). The graphs indicate that the chromatin states inferred based on the imputed data have a more consistent fraction of the genome assigned across samples than based on the observed data.

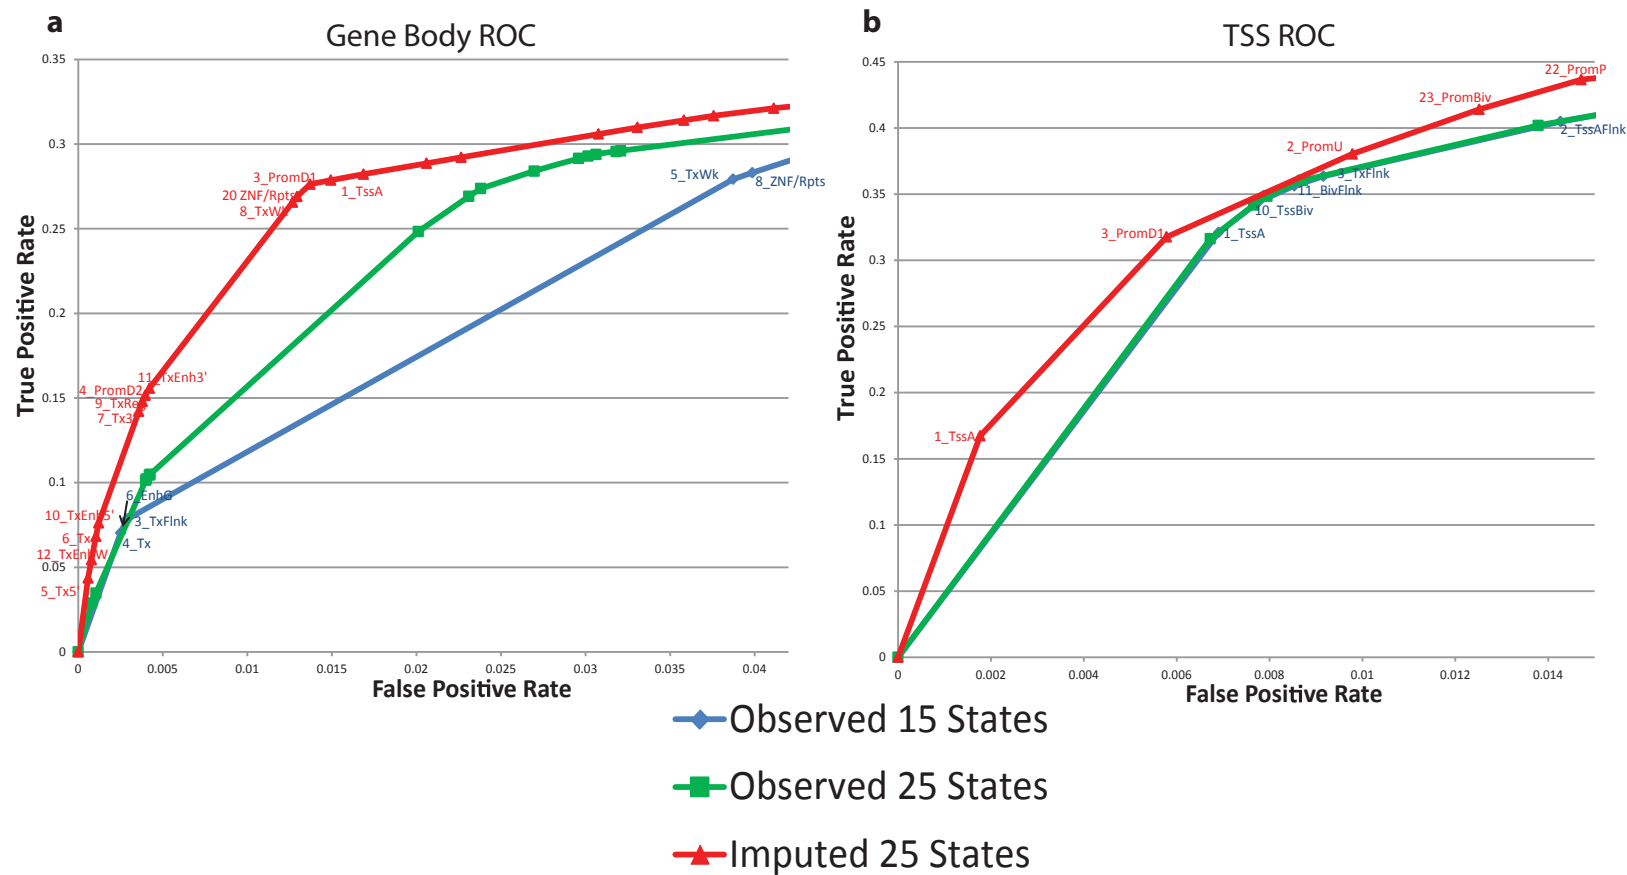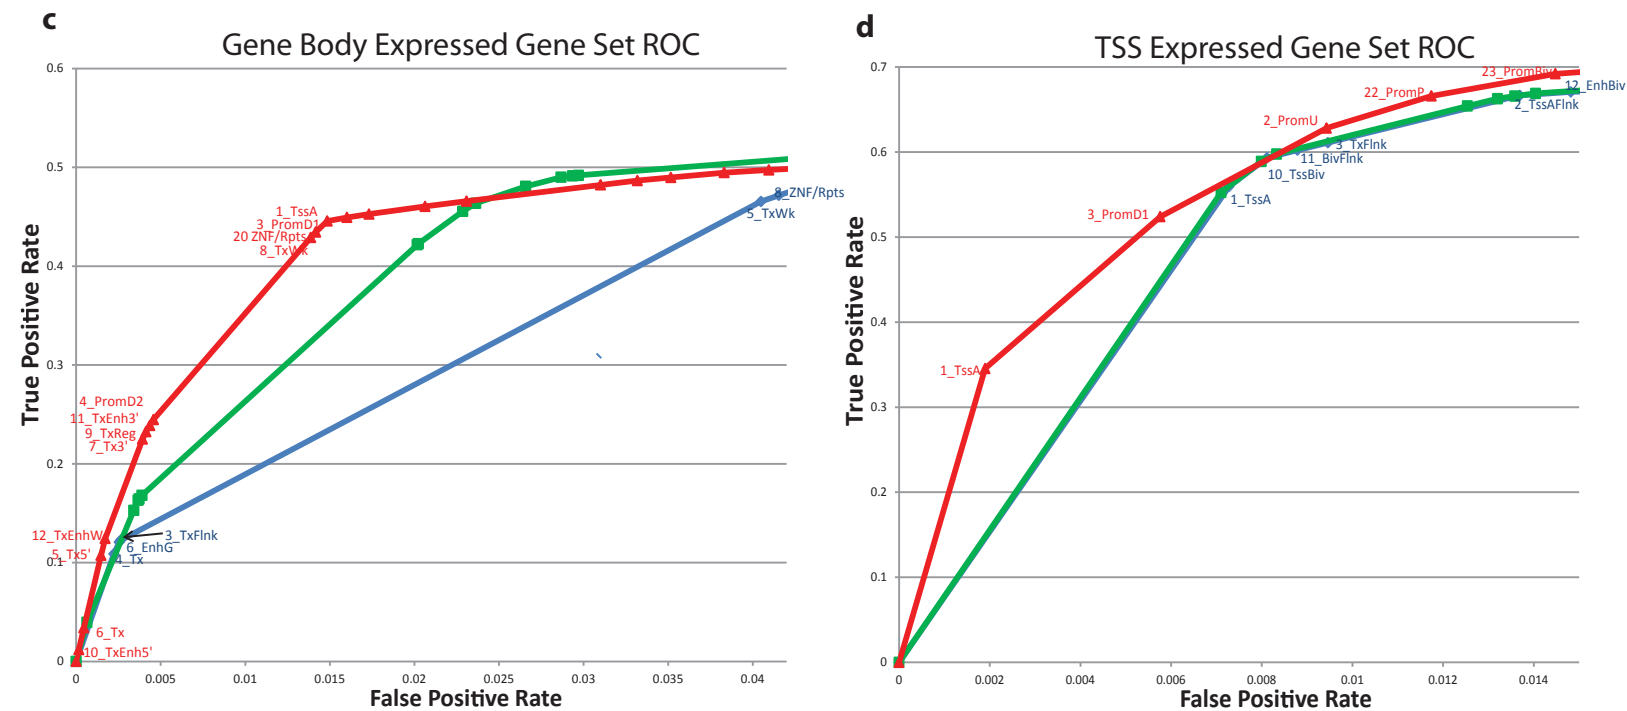

**Supplementary Figure 35: Comparison of Chromatin State Models at Recovering Annotated Gene Features.**

**(a)** The plot compares the chromatin state agreement with annotated genes for the 25-state model based on imputed data for 12-marks, the 15-state model based on observed data for 5-marks<sup>10</sup>, and a 25-state model based on observed data for 5-marks learned in the same way as the 15-state model. The plot shows for each model a portion of the best possible ROC curve for recovering bases overlapping annotated genes based on a single ordering of states used across all samples. Predictions are made for each sample and the ROC curve represents the combined results. Labeled on the ROC curve are the top prioritized states for the 25-state imputed and the 15-state observed models at the cumulative true positive and false positive rate after making predictions based on the indicated state is included. **(b)** The same plot as in **a** but for annotated transcription start sites. **(c), (d)** The same as **a** and **b**, but based on a set of expressed genes (see **Methods**) and only using samples with gene expression data available.

# Conserved Elements ROC

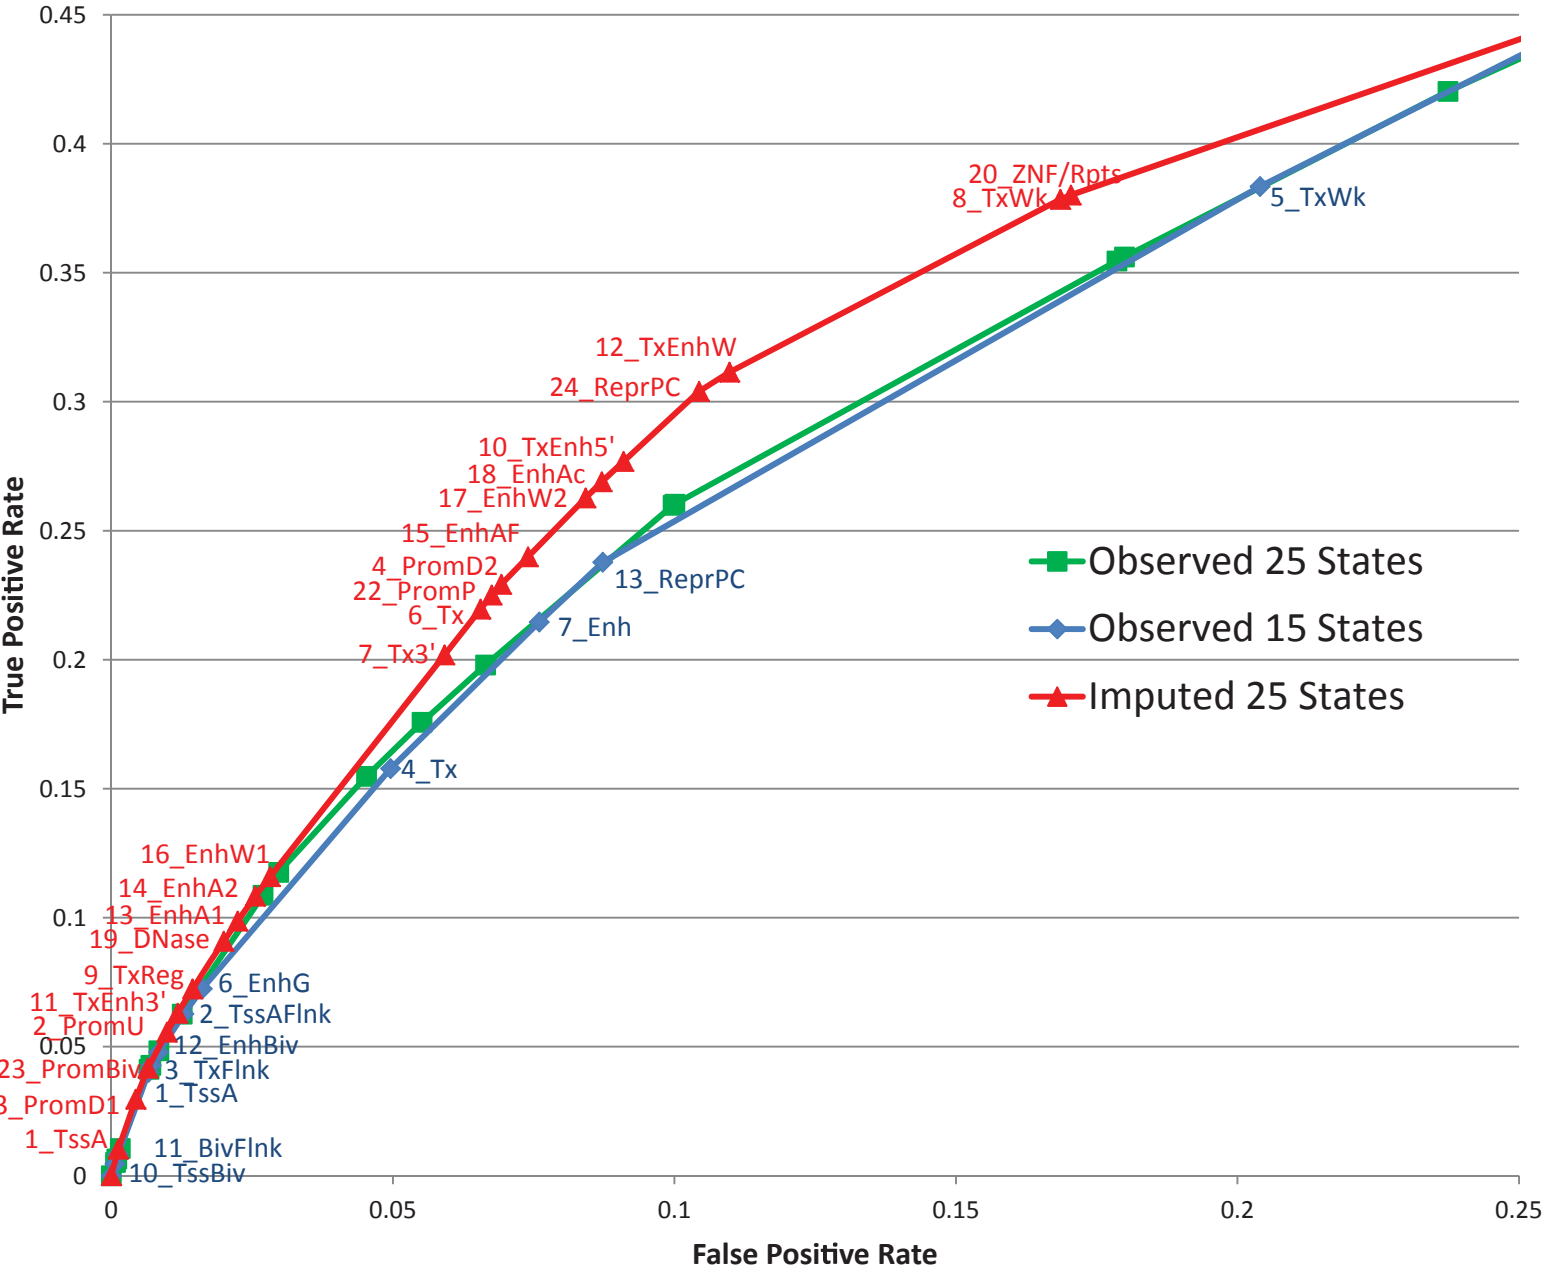

**Supplementary Figure 36:**  
**Comparison of Chromatin State Models at Recovering Evolutionarily Conserved Elements.**  
A similar plot to those shown in **Fig. S35**, but for recovering conserved elements based on the PI measure<sup>38,53</sup>.

## Osteoblasts DNase Peak Recovery

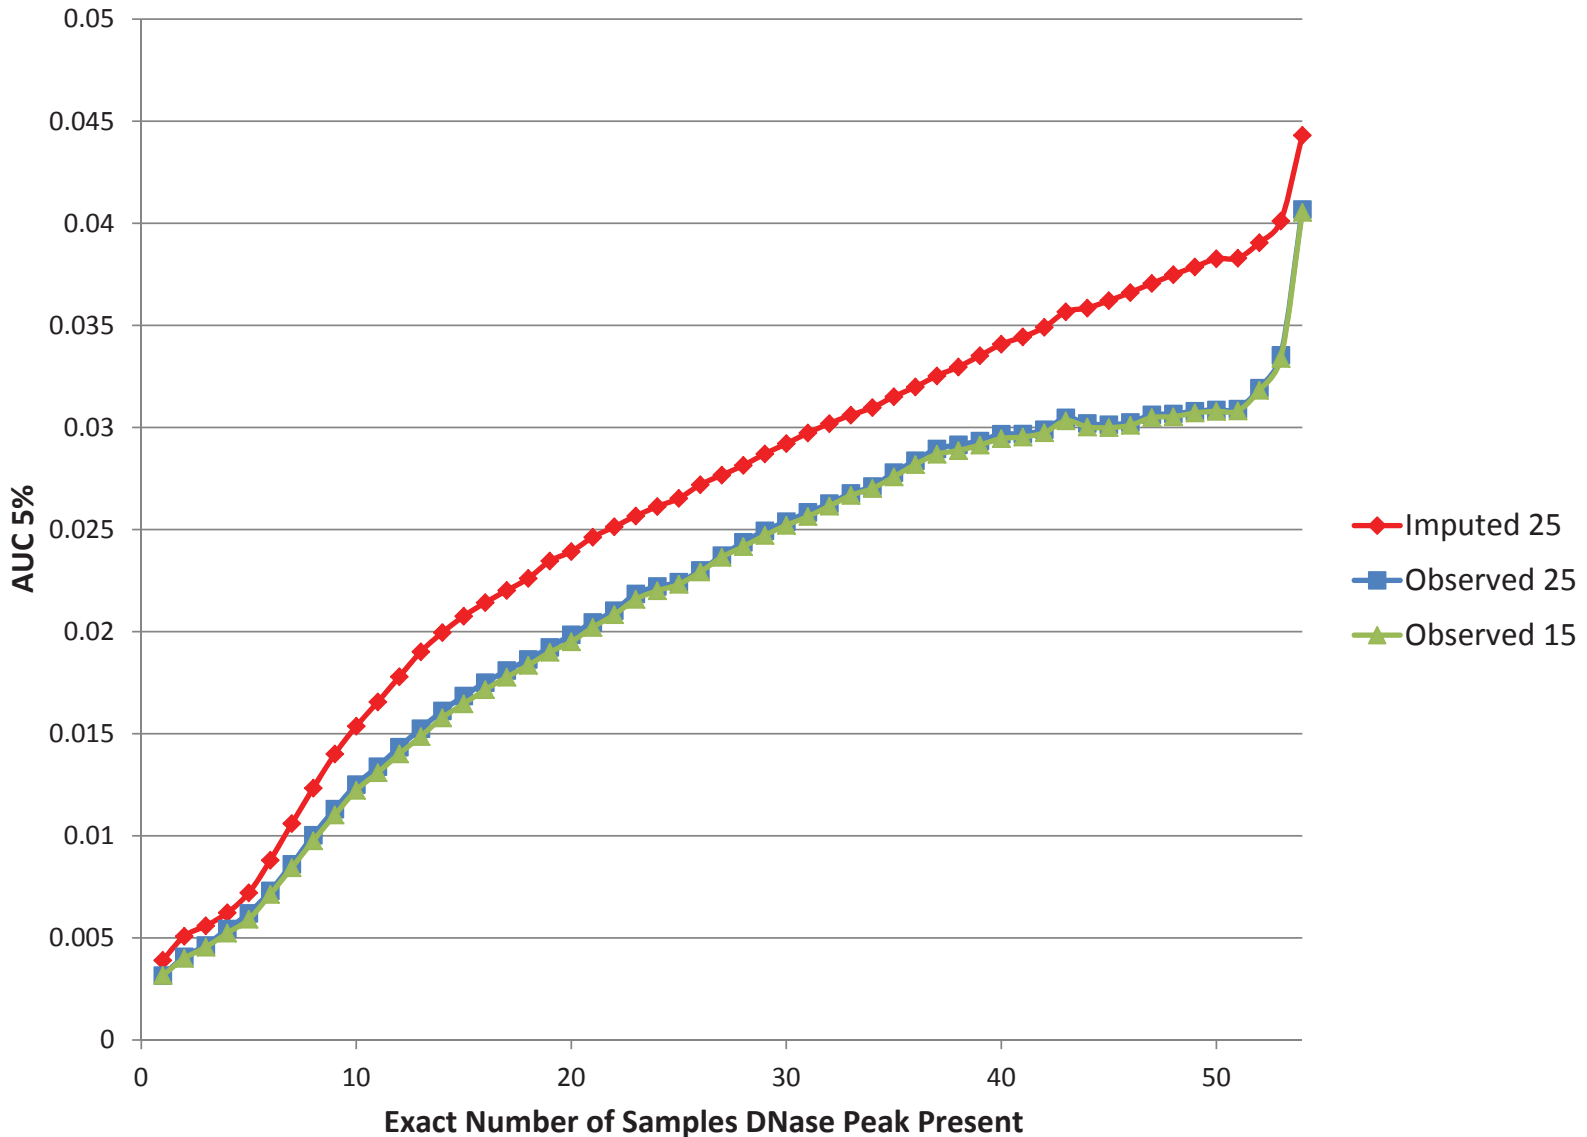

### Supplementary Figure 37: Chromatin State Correspondence with Osteoblast DNase Sites.

The figure reports the AUC up to a false positive rate of 5% for chromatin state models recovering bases covered by a DNase site in Osteoblast cells corresponding to sample E129. The bases are stratified based on the number of samples that had a DNase peak overlapping it including this dataset in Osteoblast cells. Locations which had a DNase peak, but did not overlap the number of samples being evaluated were excluded for the specific evaluation. This DNase dataset was based on a different DNase protocol<sup>39</sup> than the other datasets and thus was not included in the processed data in (Roadmap Epigenomics Consortium et al, 2015)<sup>10</sup> or used for the imputation here, and E129 otherwise did not have a DNase dataset associated with it. The three chromatin state models being compared are the imputed 25-state model, the observed 15-state model based on the 5-core marks<sup>10</sup> and an observed 25-state model which was generated in the same way as the observed 15-state model except for having a different number of states. In order to generate the ROC curve to compute an AUC 5% value the chromatin states were ordered based on the greatest fold enrichment for the Osteoblast DNase peak bases. This figure demonstrates that the imputed model was better able to recover bases covered by DNase peaks from this data, though this difference generally increased for DNase peaks which were observed in increasing numbers of other samples.

**a** Imputed Model 23\_PromBiv Observed Model 10\_TssBiv

| Ranking | Imputed Model 23_PromBiv                                            | Observed Model 10_TssBiv                                            |
|---------|---------------------------------------------------------------------|---------------------------------------------------------------------|
| 1       | E018_IPS150 Cell Line                                               | E018_IPS150 Cell Line                                               |
| 2       | E114_HUES68 Cell Line                                               | E020_IPS20a Cell Line                                               |
| 3       | E020_IPS20a Cell Line                                               | E018_HUES684 Cell Line                                              |
| 4       | E019_IPS18 Cell Line                                                | E001_ES-3 Cell Line                                                 |
| 5       | E002_ES-WAY Cell Line                                               | E118_HepG2 Hepatocellular Carcinoma Cell Line                       |
| 6       | E015_HUES6 Cell Line                                                | E015_HUES6 Cell Line                                                |
| 7       | E019_IPS18 Cell Line                                                | E019_IPS18 Cell Line                                                |
| 8       | E014_HESC Derived CD184+ Endoderm Cultured Cells                    | E014_HESC Cell Line                                                 |
| 9       | E008_H9 Cell Line                                                   | E012_HESC Derived CD26+ Endoderm Cultured Cells                     |
| 10      | E001_H1 Cell Line                                                   | E070_Brain Germinal Matrix                                          |
| 11      | E024_ES-UICSF4 Cell Line                                            | E003_H1 Cell Line                                                   |
| 12      | E012_HESC Derived CD56+ Endoderm Cultured Cells                     | E027_ForeSkin Keratinocyte Primary Cells skin02                     |
| 13      | E001_ES13 Cell Line                                                 | E002_Fetal Brain Female                                             |
| 14      | E004_H1 BMP4 Derived Mesendoderm Cultured Cells                     | E008_H9 Cell Line                                                   |
| 15      | E007_H1 Derived Neuronal Progenitor Cultured Cells                  | E011_HESC Derived CD184+ Endoderm Cultured Cells                    |
| 16      | E002_IPS DF 19-11 Cell Line                                         | E002_Fetal Stomach                                                  |
| 17      | E008_H9 Derived Neuronal Progenitor Cultured Cells                  | E112_Thymus                                                         |
| 18      | E009_Fetal Muscle Trunk                                             | E078_Duodenum Smooth Muscle                                         |
| 19      | E022_IPS DF 19-11 Cell Line                                         | E002_ES-WAY Cell Line                                               |
| 20      | E001_Placenta                                                       | E004_Fetal Intestine Large                                          |
| 21      | E002_Fetal Stomach                                                  | E006_ForeSkin Fibroblast Primary Cells skin02                       |
| 22      | E010_H9 Derived Neuron Cultured Cells                               | E005_Fetal Intestine Small                                          |
| 23      | E006_ForeSkin Fibroblast Primary Cells skin02                       | E022_IPS DF 9-9 Cell Line                                           |
| 24      | E013_HESC Derived CD56+ Mesoderm Cultured Cells                     | E013_HESC Derived CD56+ Mesoderm Cultured Cells                     |
| 25      | E003_Fetal Heart                                                    | E103_Rectal Smooth Muscle                                           |
| 26      | E000_Fetal Muscle Leg                                               | E004_H1 BMP4 Derived Mesendoderm Cultured Cells                     |
| 27      | E001_Fetal Brain Male                                               | E111_Stomach Smooth Muscle                                          |
| 28      | E035_Primary hematopoietic stem cells                               | E071_Brain Hippocampus Middle                                       |
| 29      | E009_Placenta Amnion                                                | E008_ForeSkin Keratinocyte Primary Cells skin02                     |
| 30      | E000_Fetal Adrenal Gland                                            | E008_Brain Cingulate Gyrus                                          |
| 31      | E008_Fetal Thymus                                                   | E005_ForeSkin Fibroblast Primary Cells skin01                       |
| 32      | E008_Fetal Lung                                                     | E023_Primary T cells from cord blood                                |
| 33      | E008_Fetal Kidney                                                   | E025_Adipose Derived Mesenchymal Stem Cell Cultured Cells           |
| 34      | E009_ForeSkin Melanocyte Primary Cells skin01                       | E101_Rectal Mucosa Donor 29                                         |
| 35      | E070_Brain Germinal Matrix                                          | E077_Duodenum Mucosa                                                |
| 36      | E036_Primary hematopoietic stem cells short term culture            | E006_Fetal Kidney                                                   |
| 37      | E118_HepG2 Hepatocellular Carcinoma Cell Line                       | E107_Skeletal Muscle Male                                           |
| 38      | E008_Primary neuroepithelial cells from peripheral blood            | E073_Brain Dorsolateral Prefrontal Cortex                           |
| 39      | E000_Primary neuroepithelial cells from peripheral blood            | E072_Brain Inferior Temporal Lobe                                   |
| 40      | E123_K562 Leukemia Cell Line                                        | E100_Psoas Muscle                                                   |
| 41      | E005_H1 BMP4 Derived Trophoblast Cultured Cells                     | E075_Colonic Mucosa                                                 |
| 42      | E027_Breast Myoepithelial Primary Cells                             | E000_Fetal Muscle Leg                                               |
| 43      | E004_Fetal Intestine Large                                          | E127_NHEK-Epidermal Keratinocyte Primary Cells                      |
| 44      | E045_Primary T cells effector/memory enriched from peripheral blood | E108_Skeletal Muscle Female                                         |
| 45      | E005_Fetal Intestine Small                                          | E102_Colon Smooth Muscle                                            |
| 46      | E113_Spleen                                                         | E009_Fetal Muscle Trunk                                             |
| 47      | E001_Primary B cells from cord blood                                | E000_Fetal Adrenal Gland                                            |
| 48      | E112_Thymus                                                         | E114_A549 E10H 0.02pd Lung Carcinoma Cell Line                      |
| 49      | E076_Colon Smooth Muscle                                            | E002_Primary mononuclear cells from peripheral blood                |
| 50      | E110_Stomach Mucosa                                                 | E102_Rectal Mucosa Donor 31                                         |
| 51      | E039_Primary T helper naive cells from peripheral blood             | E009_H9 Derived Neuronal Progenitor Cultured Cells                  |
| 52      | E038_Primary neuroepithelial cells from peripheral blood            | E005_ForeSkin Melanocyte Primary Cells skin03                       |
| 53      | E042_Primary T helper T cells PMA1 stimulated                       | E128_Osteoblast Primary Cells                                       |
| 54      | E075_Colonic Mucosa                                                 | E120_HSMC Skeletal Muscle Myoblasts Cell Line                       |
| 55      | E103_Rectal Smooth Muscle                                           | E008_Brain Anterior Caudate                                         |
| 56      | E111_Stomach Smooth Muscle                                          | E009_ForeSkin Melanocyte Primary Cells skin01                       |
| 57      | E008_H1 Derived Mesenchymal Stem Cells                              | E017_IR620 fetal lung fibroblasts Cell Line                         |
| 58      | E047_Primary T killer naive cells from peripheral blood             | E093_Fetal Thymus                                                   |
| 59      | E007_ForeSkin Keratinocyte Primary Cells skin02                     | E002_IPS DF 19-11 Cell Line                                         |
| 60      | E109_Small Intestine                                                | E072_Brain Inferior Temporal Lobe Cell Line                         |
| 61      | E003_Adipose Nuclei                                                 | E008_Fetal Lung                                                     |
| 62      | E048_Primary Natural Killer cells from peripheral blood             | E026_Bone Marrow Derived Cultured Mesenchymal Stem Cells            |
| 63      | E003_Cortex derived primary cultured neurospheres                   | E027_Breast Myoepithelial Primary Cells                             |
| 64      | E044_Primary T regulatory cells from peripheral blood               | E007_Brain Angular Gyrus                                            |
| 65      | E043_Primary T helper cells from peripheral blood                   | E128_NHLF Lung Fibroblast Primary Cells                             |
| 66      | E042_Primary neuroepithelial cells from peripheral blood            | E128_NHLF Astrocyte Cell Line                                       |
| 67      | E001_Fetal Brain Female                                             | E002_Ectoderm Derived Chondrocyte Cultured Cells                    |
| 68      | E004_Ganglion Emission derived primary cultured neurospheres        | E127_HSMC cell derived Skeletal Muscle Myotubes Cell Line           |
| 69      | E077_Duodenum Mucosa                                                | E020_Muscle Satellite Cells Cultured Cells                          |
| 70      | E038_Primary T helper naive cells from peripheral blood             | E023_Mesenchymal Stem Cell Derived Adipocyte Cultured Cells         |
| 71      | E034_Primary T cells from peripheral blood                          | E007_Pancreatic Islets                                              |
| 72      | E078_Duodenum Smooth Muscle                                         | E007_H1 Derived Neuronal Progenitor Cultured Cells                  |
| 73      | E002_Primary B cells from peripheral blood                          | E124_Monocytes-CD14+ RO01740 Cell Line                              |
| 74      | E107_Skeletal Muscle Male                                           | E126_NHP-Ad Adult Dermal Fibroblast Primary Cells                   |
| 75      | E005_ForeSkin Fibroblast Primary Cells skin01                       | E004_Ganglion Emission derived primary cultured neurospheres        |
| 76      | E037_Primary T helper memory cells from peripheral blood 2          | E074_Brain Substantia Nigra                                         |
| 77      | E119_HMEC Mammary Epithelial Primary Cells                          | E044_Primary T regulatory cells from peripheral blood               |
| 78      | E108_Skeletal Muscle Female                                         | E010_H9 Derived Neuron Cultured Cells                               |
| 79      | E040_Primary T helper memory cells from peripheral blood 1          | E109_Small Intestine                                                |
| 80      | E039_Primary hematopoietic stem cells G-CSF-mobilized Female        | E095_Lung Ventricle                                                 |
| 81      | E073_Brain Dorsolateral Prefrontal Cortex                           | E022_IPS DF 19-11 Cell Line                                         |
| 82      | E048_Primary T killer memory cells from peripheral blood            | E002_Primary neuroepithelial cells from peripheral blood            |
| 83      | E009_Liver                                                          | E006_H1 BMP4 Derived Trophoblast Cultured Cells                     |
| 84      | E116_GM12878 Lymphoblastoid Cell Line                               | E003_Adipose Nuclei                                                 |
| 85      | E051_Primary hematopoietic stem cells G-CSF-mobilized Male          | E110_Stomach Mucosa                                                 |
| 86      | E007_Ovary                                                          | E079_Esophagus                                                      |
| 87      | E106_Sigmoid Colon                                                  | E081_Fetal Brain Male                                               |
| 88      | E008_Brain Anterior Caudate                                         | E028_Breast variant Human Mammary Epithelial Cells (vHMEC)          |
| 89      | E041_Primary T helper cells PMA1 stimulated                         | E105_GM12878 Lymphoblastoid Cell Line                               |
| 90      | E017_IR620 fetal lung fibroblasts Cell Line                         | E045_Primary T cells effector/memory enriched from peripheral blood |
| 91      | E105_Right Ventricle                                                | E003_Cortex derived primary cultured neurospheres                   |
| 92      | E074_Brain Substantia Nigra                                         | E122_HUVEC Umbilical Ven Endothelial Cells Cell Line                |
| 93      | E117_Hela-S3 Cervical Carcinoma Cell Line                           | E091_Placenta                                                       |
| 94      | E101_Rectal Mucosa Donor 29                                         | E001_Primary B cells from cord blood                                |
| 95      | E007_Pancreatic Islets                                              | E002_Primary neuroepithelial cells from peripheral blood            |
| 96      | E072_Brain Inferior Temporal Lobe                                   | E008_Primary T killer naive cells from peripheral blood             |
| 97      | E009_Brain Cingulate Gyrus                                          | E005_Primary hematopoietic stem cells                               |
| 98      | E114_A549 E10H 0.02pd Lung Carcinoma Cell Line                      | E041_Primary T helper cells PMA1 stimulated                         |
| 99      | E028_Breast variant Human Mammary Epithelial Cells (vHMEC)          | E001_Primary hematopoietic stem cells G-CSF-mobilized Male          |
| 100     | E004_Gastric                                                        | E034_Primary T cells from peripheral blood                          |
| 101     | E124_Monocytes-CD14+ RO01740 Cell Line                              | E008_H1 Derived Mesenchymal Stem Cells                              |
| 102     | E001_Breast variant Human Mammary Epithelial Cells skin03           | E002_Primary neuroepithelial cells from peripheral blood            |
| 103     | E115_Dnd41 TCell Leukemia Cell Line                                 | E119_HMEC Mammary Epithelial Primary Cells                          |
| 104     | E102_Rectal Mucosa Donor 31                                         | E097_Ovary                                                          |
| 105     | E007_Brain Angular Gyrus                                            | E065_Aorta                                                          |
| 106     | E127_NHEK-Epidermal Keratinocyte Primary Cells                      | E042_Primary T helper T cells PMA1 stimulated                       |
| 107     | E123_Mesenchymal Stem Cell Derived Adipocyte Cultured Cells         | E043_Primary T helper cells from peripheral blood                   |
| 108     | E006_Lung                                                           | E047_Primary T killer naive cells from peripheral blood             |
| 109     | E028_PMA Astrocyte Cell Line                                        | E009_Placenta Amnion                                                |
| 110     | E108_NHLF Lung Fibroblast Primary Cells                             | E009_Primary T killer memory cells from peripheral blood            |
| 111     | E025_Adipose Derived Mesenchymal Stem Cell Cultured Cells           | E000_Primary hematopoietic stem cells G-CSF-mobilized Female        |
| 112     | E008_Pancreas                                                       | E036_Primary hematopoietic stem cells short term culture            |
| 113     | E049_Mesenchymal Stem Cell Derived Chondrocyte Cultured Cells       | E038_Primary T helper naive cells from peripheral blood             |
| 114     | E071_Brain Hippocampus Middle                                       | E123_K562 Leukemia Cell Line                                        |
| 115     | E122_HUVEC Umbilical Ven Endothelial Cells Cell Line                | E096_Lung                                                           |
| 116     | E121_HSMC cell derived Skeletal Muscle Myotubes Cell Line           | E002_Primary T killer memory cells from peripheral blood            |
| 117     | E103_Psoas Muscle                                                   | E046_Primary T killer memory cells from peripheral blood            |
| 118     | E008_ForeSkin Keratinocyte Primary Cells skin03                     | E104_Right Atrium                                                   |
| 119     | E079_Esophagus                                                      | E003_Fetal Heart                                                    |
| 120     | E120_HSMC Skeletal Muscle Myoblasts Cell Line                       | E113_Spleen                                                         |
| 121     | E129_Osteoblast Primary Cells                                       | E117_Hela-S3 Cervical Carcinoma Cell Line                           |
| 122     | E026_Bone Marrow Derived Cultured Mesenchymal Stem Cells            | E115_Dnd41 TCell Leukemia Cell Line                                 |
| 123     | E126_NHP-Ad Adult Dermal Fibroblast Primary Cells                   | E007_Primary T helper memory cells from peripheral blood 2          |
| 124     | E028_Breast variant Human Mammary Epithelial Cells                  | E006_Liver                                                          |
| 125     | E009_Left Ventricle                                                 | E040_Primary T helper memory cells from peripheral blood 1          |
| 126     | E104_Right Atrium                                                   | E004_Gastric                                                        |
| 127     | E065_Aorta                                                          | E008_Pancreas                                                       |

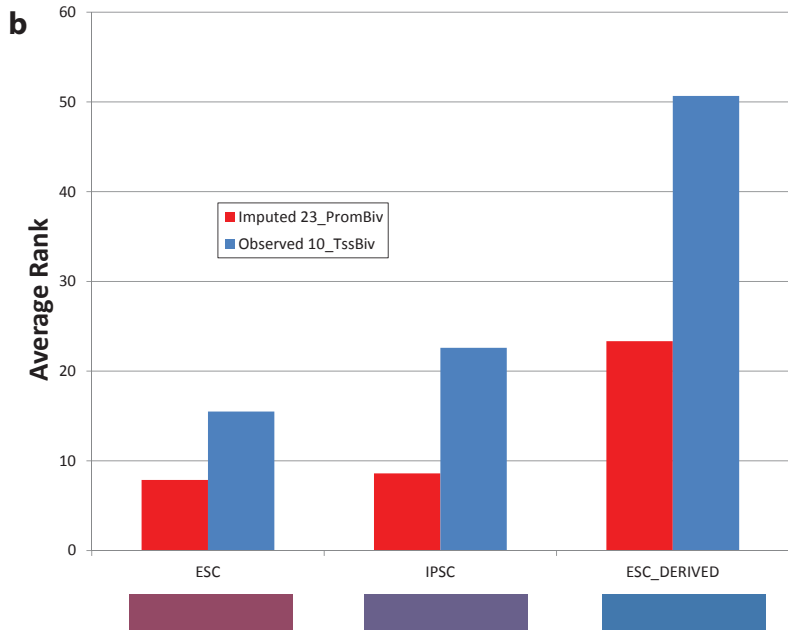

**Supplementary Figure 38:**

**Comparison of Sample Ranking for Bivalent State.**

(a) On left the 127 samples are ranked based on the relative amount of genome assigned to state 23\_PromBiv a bivalent promoter state from a chromatin state mode learned from the imputed data (Fig. 6c). On the right the same samples are ranked, but based on the presence of a bivalent promoter state (10\_TssBiv) from a chromatin state mode learned based on the observed data for 5-core marks (Fig. S33)<sup>10</sup>. The samples are colored based on their biological groups (Fig. 1). (b) The figure shows that for samples corresponding to Embryonic Stem Cells (ESC), Induced Pluripotent Stem Cells (IPSC), and ESC derived cells (ESC\_DERIVED), which could be expected to have a greater presence of the bivalent state<sup>40</sup> relative to other samples, the average of their ranks is lower (corresponding to a greater relative presence of the bivalent state) for the imputed model compared to the observed data model. Colors corresponding to each of these three groups is shown below the graph and the individual samples that comprise them have this color in a.





a

| Best match 25-state | State | H2BK15ac | H2BK20ac | H2AK5ac | H2BK120ac | H4K91ac | H2BK12ac | H3K4ac | H3K18ac | H4K83ac | H4K53ac | H3K18ac | H2BK5ac | H3K53ac | H3K27ac | H3K27me2 | H3K9me1 | H3K79me1 | H3K9ac | H3K4me2 | H3K4me3 | H2A.Z | H3K27ac | H3K4me1 | H3K79me2 | H4K20me1 | H3K36me3 | H3K9me3 | H3K27me3 |      |      |     |     |     |
|---------------------|-------|----------|----------|---------|-----------|---------|----------|--------|---------|---------|---------|---------|---------|---------|---------|----------|---------|----------|--------|---------|---------|-------|---------|---------|----------|----------|----------|---------|----------|------|------|-----|-----|-----|
| 1_TssA              | 2     | 0.0      | 0.0      | 0.0     | 0.0       | 0.0     | 0.7      | 1.7    | 15.1    | 18.0    | 8.5     | 1.2     | 1.1     | 0.0     | 13.0    | 0.0      | 0.0     | 59.4     | 99.3   | 100.0   | 81.7    | 96.7  | 95.8    | 1.0     | 31.7     | 0.0      | 0.0      | 0.1     | 0.2      |      |      |     |     |     |
| 2_PromU             | 3     | 0.0      | 0.0      | 0.0     | 0.0       | 0.0     | 0.1      | 0.1    | 7.7     | 7.6     | 3.9     | 0.1     | 0.1     | 0.0     | 26.7    | 0.0      | 0.0     | 91.2     | 100.0  | 100.0   | 87.3    | 71.3  | 69.3    | 60.7    | 2.3      | 0.1      | 0.1      | 0.5     | 0.9      |      |      |     |     |     |
| 3_PromD1            | 7     | 0.0      | 0.0      | 0.2     | 3.5       | 9.2     | 4.1      | 26.8   | 31.4    | 77.6    | 80.9    | 85.4    | 30.5    | 13.3    | 3.0     | 43.4     | 0.0     | 0.3      | 99.4   | 100.0   | 99.9    | 97.5  | 93.5    | 98.7    | 59.6     | 12.5     | 0.1      | 0.1     | 0.3      | 8.5  |      |     |     |     |
| 4_PromD2            | 10    | 0.0      | 0.0      | 0.0     | 0.0       | 0.0     | 0.0      | 0.0    | 0.0     | 0.0     | 0.0     | 0.0     | 0.0     | 0.0     | 0.0     | 0.0      | 0.0     | 0.0      | 96.7   | 100.0   | 99.5    | 93.3  | 78.4    | 54.4    | 70.3     | 89.4     | 19.0     | 2.8     | 1.1      | 2.8  | 68.8 |     |     |     |
| 5_Tss               | 12    | 0.0      | 0.0      | 0.0     | 0.0       | 0.0     | 0.0      | 0.0    | 0.0     | 0.0     | 0.0     | 0.0     | 0.0     | 0.0     | 0.0     | 0.0      | 0.0     | 0.0      | 97.5   | 100.0   | 100.0   | 93.1  | 67.4    | 42.7    | 77.4     | 15.0     | 0.5      | 0.1     | 0.8      | 98.8 |      |     |     |     |
| 6_Tx                | 13    | 0.0      | 0.0      | 0.0     | 0.0       | 0.0     | 0.0      | 0.0    | 0.0     | 0.0     | 0.0     | 0.0     | 0.0     | 0.0     | 0.0     | 0.0      | 0.0     | 0.0      | 110.0  | 100.0   | 100.0   | 90.5  | 83.3    | 99.3    | 34.6     | 98.4     | 7.8      | 1.6     | 0.2      | 4.7  |      |     |     |     |
| 7_Tx3               | 14    | 0.0      | 0.0      | 0.0     | 0.0       | 0.0     | 0.0      | 0.0    | 0.0     | 0.0     | 0.0     | 0.0     | 0.0     | 0.0     | 0.0     | 0.0      | 0.0     | 0.0      | 70.8   | 100.0   | 100.0   | 100.0 | 93.6    | 96.1    | 100.0    | 27.7     | 99.4     | 6.7     | 1.7      | 0.2  | 3.0  |     |     |     |
| 8_TxW1              | 15    | 0.0      | 0.0      | 0.0     | 0.0       | 0.0     | 0.0      | 0.0    | 0.0     | 0.0     | 0.0     | 0.0     | 0.0     | 0.0     | 0.0     | 0.0      | 0.0     | 0.0      | 157.2  | 99.9    | 100.0   | 99.2  | 92.6    | 96.5    | 99.4     | 68.0     | 51.1     | 1.8     | 0.5      | 0.3  | 9.6  |     |     |     |
| 9_TxReg             | 16    | 0.0      | 0.0      | 0.0     | 0.0       | 0.0     | 0.0      | 0.0    | 0.0     | 0.0     | 0.0     | 0.0     | 0.0     | 0.0     | 0.0     | 0.0      | 0.0     | 0.0      | 104.2  | 21.9    | 90.4    | 81.7  | 0.7     | 4.1     | 94.7     | 74.4     | 94.8     | 19.5    | 11.8     | 0.5  | 3.3  |     |     |     |
| 10_TxEnh5           | 22    | 0.0      | 0.0      | 0.0     | 0.0       | 0.0     | 0.0      | 0.0    | 0.0     | 0.0     | 0.0     | 0.0     | 0.0     | 0.0     | 0.0     | 0.0      | 0.0     | 0.0      | 122.9  | 99.9    | 100.0   | 100.0 | 48.7    | 40.4    | 83.3     | 70.2     | 97.1     | 9.3     | 1.4      | 0.2  | 6.0  |     |     |     |
| 11_TxEnh3           | 23    | 0.0      | 0.0      | 0.1     | 0.1       | 0.3     | 0.8      | 1.0    | 0.1     | 0.2     | 3.0     | 3.0     | 0.6     | 0.1     | 0.0     | 0.6      | 0.7     | 6.5      | 6.3    | 1.0     | 0.3     | 19.7  | 30.6    | 42.4    | 11.2     | 10.9     | 86.4     | 0.4     | 0.1      | 0.3  | 2.3  |     |     |     |
| 12_TxEnhW           | 25    | 0.0      | 0.0      | 0.0     | 0.0       | 0.2     | 2.4      | 0.0    | 0.0     | 1.1     | 1.7     | 0.2     | 0.0     | 0.5     | 0.9     | 0.2      | 7.8     | 0.2      | 16.5   | 23.8    | 83.6    | 80.7  | 6.1     | 1.9     | 0.0      | 0.1      | 0.2      | 0.1     | 0.4      | 0.1  | 0.4  |     |     |     |
| 13_EnhA1            | 27    | 5.1      | 40.1     | 51.1    | 83.6      | 88.0    | 87.6     | 83.3   | 49.7    | 69.3    | 97.0    | 99.4    | 85.8    | 8.9     | 2.3     | 17.8     | 0.0     | 5.3      | 76.1   | 85.6    | 35.7    | 46.4  | 85.8    | 95.5    | 99.9     | 11.9     | 1.2      | 3.2     | 0.3      | 1.1  |      |     |     |     |
| 15_EnhAF            | 31    | 16.7     | 67.2     | 62.7    | 84.3      | 97.8    | 95.4     | 87.3   | 43.8    | 53.1    | 77.8    | 99.1    | 52.0    | 4.2     | 1.3     | 8.0      | 0.0     | 2.7      | 3.9    | 20.7    | 0.7     | 14.3  | 30.7    | 63.9    | 92.0     | 1.4      | 0.2      | 2.7     | 0.6      | 3.4  |      |     |     |     |
| 16_EnhW1            | 33    | 0.0      | 0.0      | 0.0     | 0.0       | 0.0     | 0.0      | 0.0    | 0.0     | 0.0     | 0.0     | 0.0     | 0.0     | 0.0     | 0.0     | 0.0      | 0.0     | 0.0      | 89.7   | 56.8    | 53.9    | 45.9  | 32.6    | 85.0    | 1.1      | 0.2      | 0.1      | 0.1     | 0.1      | 2.1  |      |     |     |     |
| 17_EnhW2            | 34    | 0.0      | 0.0      | 0.0     | 0.0       | 0.0     | 0.0      | 0.0    | 0.0     | 0.0     | 0.0     | 0.0     | 0.0     | 0.0     | 0.0     | 0.0      | 0.0     | 0.0      | 60.0   | 21.4    | 0.2     | 53.2  | 23.3    | 2.7     | 38.3     | 0.1      | 0.1      | 0.0     | 0.6      | 1.0  |      |     |     |     |
| 18_EnhAc            | 37    | 0.0      | 0.1      | 0.0     | 0.0       | 0.1     | 0.3      | 0.1    | 0.0     | 0.0     | 0.2     | 1.5     | 0.0     | 0.0     | 0.0     | 0.0      | 0.0     | 0.0      | 0.6    | 1.4     | 0.2     | 0.6   | 26.5    | 55.2    | 9.6      | 0.2      | 0.0      | 0.2     | 0.8      | 0.2  | 0.2  |     |     |     |
| 19_DNase            | 39    | 4.9      | 50.4     | 17.8    | 27.4      | 63.9    | 74.8     | 44.9   | 8.1     | 5.9     | 17.1    | 83.9    | 5.0     | 0.1     | 0.0     | 6.0      | 0.0     | 2.2      | 0.8    | 0.1     | 1.2     | 3.5   | 4.2     | 8.2     | 0.9      | 0.1      | 2.9      | 2.1     | 2.5      | 2.5  |      |     |     |     |
| 20_ZNF/Rpts         | 41    | 0.0      | 0.0      | 0.0     | 0.0       | 0.0     | 0.0      | 0.0    | 0.0     | 0.0     | 0.0     | 0.0     | 0.0     | 0.0     | 0.0     | 0.0      | 0.0     | 0.0      | 0.0    | 0.3     | 0.0     | 0.0   | 0.0     | 0.0     | 0.0      | 0.0      | 0.0      | 0.0     | 0.0      | 0.0  | 0.2  | 0.1 |     |     |
| 21_Het              | 44    | 0.0      | 0.0      | 0.0     | 0.0       | 0.0     | 0.0      | 0.0    | 0.0     | 0.0     | 0.0     | 0.0     | 0.0     | 0.0     | 0.0     | 0.0      | 0.0     | 0.0      | 0.0    | 0.0     | 0.0     | 0.0   | 0.0     | 0.0     | 0.0      | 0.0      | 0.0      | 0.0     | 0.0      | 0.0  | 0.0  | 0.1 | 0.1 |     |
| 22_PromP            | 45    | 0.0      | 0.0      | 0.0     | 0.0       | 0.1     | 0.1      | 0.1    | 0.0     | 0.1     | 0.6     | 0.3     | 0.0     | 0.0     | 0.0     | 0.0      | 0.0     | 0.0      | 0.0    | 12.6    | 97.5    | 91.9  | 47.4    | 37.8    | 11.3     | 92.9     | 4.9      | 1.3     | 0.2      | 1.6  | 99.4 |     |     |     |
| 23_PromBiv          | 46    | 0.0      | 0.0      | 0.0     | 0.0       | 0.0     | 0.0      | 0.0    | 0.0     | 0.0     | 0.0     | 0.0     | 0.0     | 0.0     | 0.0     | 0.0      | 0.0     | 0.0      | 0.0    | 5.5     | 58.3    | 71.8  | 15.0    | 16.2    | 2.7      | 20.8     | 1.9      | 0.1     | 0.3      | 6.4  | 93.8 |     |     |     |
| 24_ReprPC           | 47    | 0.0      | 0.0      | 0.0     | 0.0       | 0.0     | 0.0      | 0.0    | 0.0     | 0.0     | 0.0     | 0.0     | 0.0     | 0.0     | 0.0     | 0.0      | 0.0     | 0.0      | 0.0    | 0.0     | 0.0     | 0.0   | 0.0     | 0.0     | 0.0      | 0.0      | 0.0      | 0.0     | 0.0      | 0.0  | 0.0  | 0.1 | 0.1 |     |
| 25_Quies            | 50    | 0.0      | 0.0      | 0.0     | 0.0       | 0.0     | 0.0      | 0.0    | 0.0     | 0.0     | 0.0     | 0.0     | 0.0     | 0.0     | 0.0     | 0.0      | 0.0     | 0.0      | 0.0    | 0.0     | 0.0     | 0.0   | 0.0     | 0.0     | 0.0      | 0.0      | 0.0      | 0.0     | 0.0      | 0.0  | 0.0  | 0.0 | 0.0 | 0.0 |

b

| Genome % | CG    | Dxons | Genes | Introns | TSS | TSS_2kb | TSS  | TSS_2kb | ZNF_genes | Conservation PI | DNA Methyl Observed | DNA Methyl Imputed | RNA-seq Observed | RNA-seq Imputed |     |
|----------|-------|-------|-------|---------|-----|---------|------|---------|-----------|-----------------|---------------------|--------------------|------------------|-----------------|-----|
| 0.10     | 53.8  | 1.4   | 1.8   | 0.7     | 3.8 | 2.7     | 1.1  | 0.9     | 0.0       | 0.0             | 0.0                 | 0.0                | 0.0              | 0.0             |     |
| 0.09     | 80.2  | 9.2   | 1.3   | 0.7     | 3.1 | 2.6     | 40.7 | 8.6     | 3.0       | 4.8             | 0.0                 | 0.1                | 0.8              | 0.7             |     |
| 0.13     | 34.9  | 5.0   | 1.1   | 0.8     | 3.2 | 2.5     | 27.8 | 8.4     | 2.6       | 3.8             | 0.1                 | 0.2                | 0.3              | 0.4             |     |
| 0.07     | 58.7  | 7.5   | 1.2   | 0.7     | 3.2 | 2.6     | 45.4 | 8.8     | 3.3       | 4.3             | 0.1                 | 0.1                | 0.4              | 0.6             |     |
| 0.04     | 58.1  | 6.5   | 1.3   | 0.9     | 3.9 | 2.6     | 14.1 | 7.0     | 1.0       | 3.6             | 0.2                 | 0.2                | 0.5              | 0.5             |     |
| 0.11     | 65.3  | 8.1   | 1.5   | 1.0     | 3.7 | 2.5     | 25.4 | 8.7     | 1.2       | 3.8             | 0.1                 | 0.1                | 0.3              | 0.4             |     |
| 0.09     | 64.2  | 5.2   | 1.3   | 1.3     | 4.0 | 2.9     | 41.5 | 7.1     | 5.3       | 4.4             | 0.0                 | 0.1                | 1.2              | 1.3             |     |
| 0.07     | 89.3  | 11.8  | 1.1   | 1.1     | 4.1 | 3.0     | 46.0 | 4.3     | 5.4       | 0.0             | 0.1                 | 1.5                | 1.4              | 1.4             |     |
| 0.04     | 73.7  | 8.5   | 1.4   | 0.9     | 3.0 | 2.6     | 23.9 | 7.0     | 2.0       | 4.3             | 0.1                 | 0.2                | 1.1              | 1.0             |     |
| 0.16     | 0.89  | 3.4   | 1.9   | 1.8     | 3.5 | 2.6     | 2.4  | 8.1     | 4.6       | 2.2             | 0.8                 | 0.7                | 0.7              | 0.8             |     |
| 0.12     | 10.44 | 1.9   | 1.7   | 3.8     | 2.6 | 5.8     | 8.4  | 4.6     | 3.1       | 0.3             | 0.7                 | 0.8                | 0.8              | 0.8             |     |
| 1.27     | 0.08  | 0.5   | 2.4   | 0.6     | 0.9 | 0.6     | 1.4  | 2.4     | 0.7       | 0.7             | 0.1                 | 0.1                | 0.1              | 0.3             |     |
| 0.18     | 23.4  | 5.6   | 2.4   | 1.7     | 6.1 | 3.6     | 3.1  | 3.0     | 2.8       | 0.5             | 0.1                 | 1.1                | 1.1              | 1.4             |     |
| 0.44     | 12.1  | 5.1   | 2.0   | 1.7     | 5.9 | 3.9     | 2.4  | 2.9     | 3.9       | 2.5             | 0.9                 | 0.9                | 1.0              | 1.1             |     |
| 2.68     | 1.27  | 6.2   | 1.6   | 1.6     | 6.9 | 4.1     | 2.2  | 2.7     | 2.8       | 2.8             | 0.5                 | 0.5                | 1.0              | 1.1             |     |
| 3.29     | 0.33  | 2.9   | 1.9   | 1.8     | 2.6 | 3.2     | 1.1  | 1.9     | 2.8       | 1.3             | 0.9                 | 0.8                | 0.4              | 0.6             |     |
| 1.81     | 0.17  | 0.6   | 2.9   | 2.9     | 0.7 | 0.9     | 0.6  | 1.2     | 2.7       | 0.8             | 0.9                 | 0.8                | 0.1              | 0.3             |     |
| 2.88     | 0.21  | 0.9   | 1.1   | 1.2     | 0.9 | 1.1     | 0.6  | 1.0     | 0.7       | 1.0             | 0.6                 | 0.6                | 0.1              | 0.1             |     |
| 0.02     | 8.86  | 4.2   | 1.7   | 3.7     | 2.3 | 4.4     | 4.8  | 2.0     | 3.5       | 0.5             | 0.5                 | 0.8                | 0.8              | 1.0             |     |
| 0.06     | 3.49  | 6.3   | 1.9   | 1.6     | 7.6 | 5.6     | 7.5  | 2.4     | 3.6       | 0.6             | 0.5                 | 1.2                | 1.4              | 1.4             |     |
| 0.01     | 1.05  | 1.7   | 1.9   | 1.9     | 1.9 | 1.4     | 1.9  | 2.0     | 1.7       | 0.8             | 0.8                 | 0.3                | 0.6              | 0.6             |     |
| 0.12     | 0.58  | 2.1   | 2.9   | 2.0     | 1.5 | 2.0     | 2.3  | 1.6     | 2.0       | 0.8             | 0.8                 | 0.4                | 0.8              | 0.8             |     |
| 0.03     | 1.08  | 1.6   | 1.9   | 2.0     | 1.5 | 1.3     | 1.3  | 1.8     | 2.1       | 1.7             | 0.6                 | 0.8                | 0.3              | 0.7             |     |
| 0.15     | 1.79  | 7.4   | 1.3   | 1.4     | 3.0 | 3.2     | 1.9  | 3.6     | 0.2       | 0.7             | 0.7                 | 0.7                | 0.7              | 0.7             |     |
| 0.29     | 0.18  | 0.8   | 7.0   | 7.0     | 0.7 | 0.9     | 1.1  | 1.8     | 2.1       | 1.9             | 0.8                 | 0.8                | 0.1              | 0.4             |     |
| 0.41     | 0.12  | 0.5   | 2.0   | 2.1     | 0.6 | 0.8     | 0.7  | 1.2     | 1.4       | 0.7             | 0.5                 | 0.5                | 0.1              | 0.4             |     |
| 0.06     | 1.76  | 1.8   | 1.2   | 1.1     | 1.7 | 1.5     | 3.3  | 2.5     | 1.1       | 2.8             | 0.5                 | 0.5                | 0.2              | 0.4             |     |
| 0.12     | 1.12  | 2.0   | 1.3   | 1.3     | 1.7 | 1.6     | 3.4  | 2.4     | 1.2       | 3.5             | 0.4                 | 0.4                | 0.3              | 0.4             |     |
| 0.02     | 0.86  | 1.7   | 1.0   | 1.0     | 1.5 | 1.4     | 1.2  | 1.6     | 0.6       | 1.7             | 0.7                 | 0.7                | 0.2              | 0.3             |     |
| 0.15     | 1.4   | 2.5   | 1.8   | 1.8     | 1.5 | 1.4     | 1.5  | 1.6     | 0.9       | 2.6             | 0.7                 | 0.7                | 0.1              | 0.3             |     |
| 0.08     | 0.67  | 1.4   | 1.1   | 1.0     | 1.4 | 1.3     | 1.5  | 1.6     | 0.6       | 1.7             | 0.8                 | 0.8                | 0.2              | 0.2             |     |
| 0.15     | 0.38  | 1.2   | 1.1   | 1.2     | 1.2 | 1.4     | 1.5  | 1.6     | 0.8       | 1.8             | 0.7                 | 0.7                | 0.1              | 0.2             |     |
| 0.14     | 5.95  | 2.7   | 1.1   | 0.9     | 2.6 | 2.0     | 6.7  | 5.0     | 1.6       | 2.9             | 0.4                 | 0.4                | 0.2              | 0.3             |     |
| 0.14     | 0.9   | 1.4   | 0.8   | 0.7     | 1.4 | 1.1     | 3.0  | 2.1     | 0.6       | 2.2             | 0.7                 | 0.7                | 0.0              | 0.1             |     |
| 1.19     | 0.24  | 1.2   | 1.3   | 1.3     | 1.1 | 1.2     | 1.1  | 1.4     | 0.8       | 2.4             | 0.6                 | 0.6                | 0.1              | 0.2             |     |
| 0.36     | 0.17  | 1.4   | 1.3   | 1.3     | 1.3 | 1.4     | 1.5  | 1.6     | 0.9       | 2.6             | 0.7                 | 0.7                | 0.6              | 0.1             |     |
| 0.17     | 0.26  | 1.1   | 1.1   | 1.1     | 1.0 | 1.2     | 1.4  | 1.4     | 0.7       | 1.8             | 0.7                 | 0.7                | 0.1              | 0.2             |     |
| 0.03     | 0.65  | 1.1   | 1.0   | 0.9     | 1.4 | 1.1     | 0.9  | 1.2     | 0.2       | 1.0             | 0.9                 | 0.8                | 0.1              | 0.2             |     |
| 0.09     | 0.57  | 1.1   | 1.0   | 0.9     | 1.1 | 1.0     | 1.1  | 1.0     | 1.1       | 0.3             | 1.1                 | 0.9                | 0.8              | 0.1             | 0.2 |
| 0.41     | 0.14  | 0.7   | 1.0   | 1.0     | 0.8 | 1.0     | 0.5  | 1.0     | 0.3       | 1.0             | 0.9                 | 0.8                | 0.1              | 0.1             |     |
| 0.40     | 0.49  | 1.1   | 1.0   | 1.2     | 1.1 | 2.0     | 1.2  | 0.6     | 2.8       | 0.5             | 0.5                 | 0.5                | 0.1              | 0.1             |     |
| 0.17     | 1.2   | 5.5   | 1.6   | 1.4     | 1.6 | 1.4     | 1.6  | 1.      |           |                 |                     |                    |                  |                 |     |

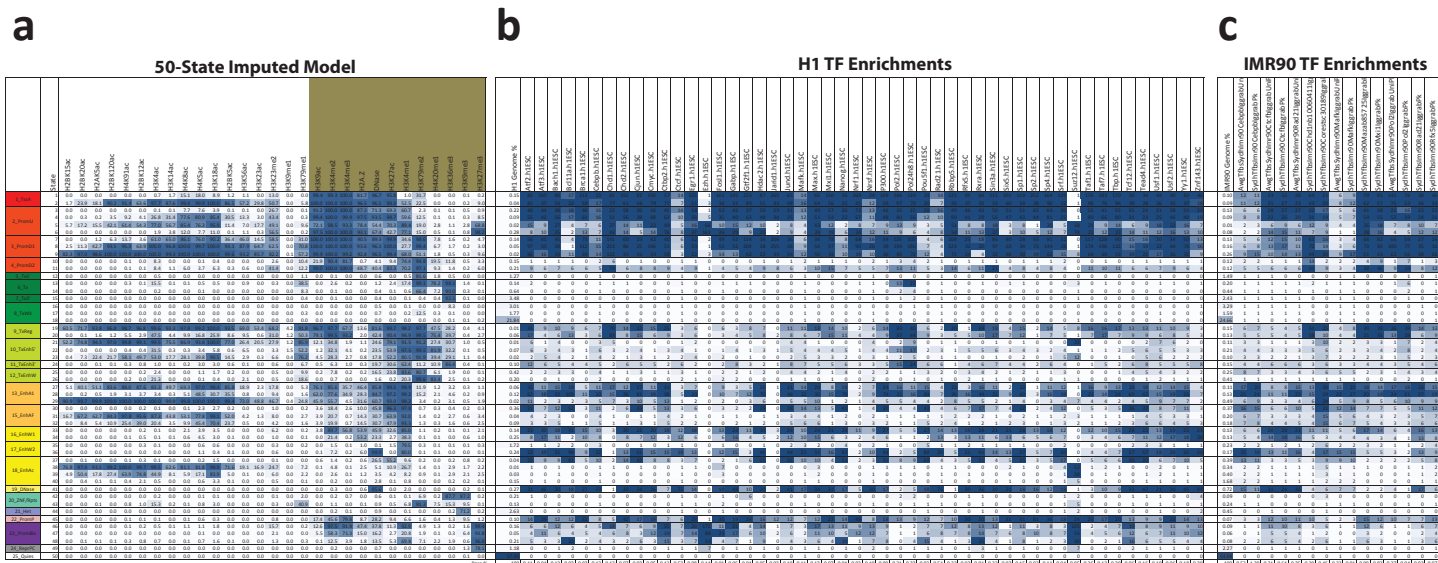

**Supplementary Figure 41: Chromatin State Transcription Factor Binding Enrichments.**

(a) The same emission parameters of the same expanded mark chromatin state model based on imputed data shown in **Fig. 6d** and **Fig. S39-40**. (b) The heatmap shows the H1 chromatin state fold enrichment for a collection of H1 ENCODE transcription factor binding datasets based on the uniform processed peak calls<sup>2</sup>, which was curated in (Roadmap Epigenomics Consortium et al, 2015)<sup>10</sup>. The first column gives the chromatin state percentages and the last row the genome coverage of the peak call dataset. (c) The same heatmap but for the IMR90 chromatin states and a collection of ENCODE transcription factor binding in IMR90 cells<sup>2</sup>. The table shows data for ten different datasets, based on the lab provided peak calls. For five of the data sets there was also available uniformly processed peak calls<sup>2</sup> indicated by the 'Awg' prefix and their enrichments are also shown.

## Relative Top 1% Agreement and 0.25-concordance for DNA-methylation

**a**

| Mark/Feature Set                                     | H3K27me3 | H3K36me3 | H3K4me1 | H3K4me3 | H3K9me3 | H3K27ac | H3K9ac | DNase | H3K4me2 | H2A.Z | H3K79me2 | H4K20me1 | H2AK5ac | H2BK120ac | H2BK5ac | H3K18ac | H3K23ac | H3K4ac | H3K79me1 | H4K8ac | H2BK12ac | H3K14ac | H4K91ac | H2BK15ac | H2BK20ac | H3K56ac | H4K5ac | H3K23me2 | RNA-seq | DNA Methylation | All Marks | Acetylations Only |
|------------------------------------------------------|----------|----------|---------|---------|---------|---------|--------|-------|---------|-------|----------|----------|---------|-----------|---------|---------|---------|--------|----------|--------|----------|---------|---------|----------|----------|---------|--------|----------|---------|-----------------|-----------|-------------------|
| All Tier 1-3 Features                                | 1.00     | 1.00     | 1.00    | 1.00    | 1.00    | 1.00    | 1.00   | 1.00  | 1.00    | 1.00  | 1.00     | 1.00     | 1.00    | 1.00      | 1.00    | 1.00    | 1.00    | 1.00   | 1.00     | 1.00   | 1.00     | 1.00    | 1.00    | 1.00     | 1.00     | 1.00    | 1.00   | 1.00     | 1.00    | 1.00            | 1.00      | 1.00              |
| Same Sample Features Only                            | 0.99     | 0.99     | 0.99    | 0.99    | 0.99    | 0.99    | 0.99   | 0.99  | 0.99    | 0.99  | 0.99     | 0.99     | 0.99    | 0.99      | 0.99    | 0.99    | 0.99    | 0.99   | 0.99     | 0.99   | 0.99     | 0.99    | 0.99    | 0.99     | 0.99     | 0.99    | 0.99   | 0.99     | 0.99    | 0.99            | 0.99      | 0.99              |
| Core + H3K18ac                                       | 1.00     | 0.98     | 0.97    | 1.01    | 0.85    | 0.98    | 1.00   | 0.99  | 1.00    | 0.97  | 0.63     | 0.88     | 0.90    | 0.82      | 0.71    | 0.91    | 1.02    | 0.73   | 0.94     | 0.87   | 0.94     | 0.86    | 0.82    | 0.84     | 0.97     | 0.96    | 0.99   | 1.01     | 1.00    | 0.93            | 0.91      |                   |
| Core + H3K27ac                                       | 1.00     | 1.00     | 0.90    | 0.96    | 1.01    | 0.79    | 0.97   | 1.01  | 1.00    | 1.01  | 0.99     | 0.63     | 0.81    | 0.69      | 0.90    | 0.76    | 0.74    | 0.76   | 0.74     | 0.79   | 0.64     | 0.75    | 0.66    | 0.51     | 0.55     | 0.91    | 0.90   | 1.01     | 1.01    | 1.00            | 0.86      | 0.77              |
| Core + H3K9ac                                        | 0.99     | 1.00     | 0.76    | 0.98    | 1.02    | 0.81    | 0.95   | 0.98  | 1.00    | 1.01  | 0.96     | 0.61     | 0.74    | 0.61      | 0.69    | 0.73    | 0.80    | 0.72   | 0.77     | 0.76   | 0.67     | 0.60    | 0.53    | 0.43     | 0.81     | 0.75    | 0.98   | 1.01     | 1.00    | 0.82            | 0.72      |                   |
| Core + DNase                                         | 0.99     | 0.99     | 0.80    | 0.97    | 1.02    | 0.86    | 0.95   | 1.00  | 1.01    | 0.97  | 0.61     | 0.74     | 0.61    | 0.69      | 0.73    | 0.77    | 0.78    | 0.61   | 0.73     | 0.61   | 0.47     | 0.63    | 0.66    | 0.58     | 0.97     | 0.81    | 0.98   | 1.00     | 1.00    | 0.73            | 0.64      |                   |
| Core (H3K27me3, H3K4me1, H3K4me3, H3K9me3, H3K36me3) | 0.98     | 0.99     | 0.71    | 0.95    | 1.02    | 0.79    | 0.95   | 1.02  | 1.00    | 1.00  | 0.98     | 0.62     | 0.74    | 0.58      | 0.67    | 0.71    | 0.70    | 0.77   | 0.74     | 0.59   | 0.71     | 0.59    | 0.45    | 0.39     | 0.67     | 0.66    | 1.00   | 1.00     | 1.00    | 0.80            | 0.68      |                   |
| Core + H3K18ac - Same Sample Features Only           | 0.93     | 0.12     | 0.70    | 0.57    | 0.23    | 0.78    | 0.95   | 0.62  | 0.92    | 0.93  | 0.53     | 0.60     | 0.85    | 0.89      | 0.81    | 0.64    | 0.90    | 1.03   | 0.45     | 0.92   | 0.83     | 0.93    | 0.84    | 0.83     | 0.97     | 0.96    | 0.99   | 0.21     | 0.96    | 0.85            | 0.90      |                   |
| Core + H3K27ac - Same Sample Features Only           | 0.38     | 0.16     | 0.73    | 0.49    | 0.19    | 0.68    | 0.95   | 0.68  | 0.93    | 0.91  | 0.56     | 0.61     | 0.74    | 0.65      | 0.89    | 0.71    | 0.70    | 0.72   | 0.49     | 0.74   | 0.59     | 0.73    | 0.62    | 0.49     | 0.55     | 0.91    | 0.90   | 1.03     | 0.21    | 0.95            | 0.78      | 0.78              |
| Core + H3K9ac - Same Sample Features Only            | 0.37     | 0.15     | 0.43    | 0.79    | 0.18    | 0.72    | 0.92   | 0.58  | 0.93    | 0.91  | 0.58     | 0.60     | 0.67    | 0.53      | 0.63    | 0.69    | 0.78    | 0.68   | 0.50     | 0.70   | 0.54     | 0.70    | 0.53    | 0.50     | 0.44     | 0.83    | 0.74   | 0.98     | 0.22    | 0.95            | 0.73      | 0.67              |
| Core + DNase - Same Sample Features Only             | 0.35     | 0.15     | 0.31    | 0.71    | 0.20    | 0.68    | 0.92   | 0.59  | 0.92    | 0.90  | 0.54     | 0.59     | 0.63    | 0.51      | 0.62    | 0.64    | 0.66    | 0.62   | 0.51     | 0.67   | 0.52     | 0.69    | 0.53    | 0.44     | 0.39     | 0.67    | 0.67   | 1.00     | 0.20    | 0.95            | 0.70      | 0.62              |
| Tier 1 and 2 Marks                                   | 1.01     | 1.00     | 0.94    | 1.00    | 1.01    | 0.84    | 0.98   | 1.01  | 0.99    | 1.02  | 0.95     | 1.03     | 0.78    | 0.69      | 0.89    | 0.78    | 0.83    | 0.68   | 0.99     | 0.84   | 0.66     | 0.77    | 0.69    | 0.56     | 0.86     | 0.91    | 1.18   | 1.01     | 1.00    | 0.89            | 0.78      |                   |
| Tier 1 and 2 Marks - Same Sample Features Only       | 0.45     | 0.19     | 0.90    | 0.95    | 0.16    | 0.82    | 0.97   | 0.67  | 0.96    | 0.93  | 0.57     | 0.10     | 0.73    | 0.67      | 0.88    | 0.75    | 0.81    | 0.68   | 0.96     | 0.82   | 0.64     | 0.76    | 0.67    | 0.53     | 0.56     | 0.86    | 0.91   | 1.16     | 0.20    | 0.97            | 0.85      | 0.77              |
| H3K27me3                                             | 0.92     | 0.65     | 0.96    | 0.98    | 0.68    | 0.85    | 0.98   | 0.94  | 0.85    | 0.94  | 0.29     | 0.48     | 0.45    | 0.46      | 0.59    | 0.37    | 0.58    | 0.79   | 0.59     | 0.42   | 0.50     | 0.43    | 0.20    | 0.20     | 0.20     | 0.32    | 1.00   | 1.00     | 0.62    | 0.44            | 0.62      | 0.44              |
| H3K36me3                                             | 0.98     | 0.65     | 0.95    | 0.97    | 0.61    | 0.82    | 0.83   | 0.93  | 0.88    | 0.98  | 0.93     | 0.88     | 0.96    | 0.46      | 0.61    | 0.71    | 0.71    | 0.71   | 0.59     | 0.40   | 0.52     | 0.44    | 0.22    | 0.09     | 0.25     | 0.28    | 1.00   | 1.00     | 0.60    | 0.44            | 0.62      | 0.44              |
| H3K4me1                                              | 0.98     | 1.00     | 0.96    | 0.96    | 0.76    | 0.86    | 0.98   | 0.92  | 0.99    | 0.51  | 0.72     | 0.38     | 0.62    | 0.67      | 0.58    | 0.66    | 0.73    | 0.67   | 0.67     | 0.57   | 0.62     | 0.56    | 0.47    | 0.44     | 0.44     | 0.53    | 1.01   | 1.01     | 0.99    | 0.73            | 0.61      | 0.51              |
| H3K4me3                                              | 0.95     | 0.98     | 0.68    | 0.97    | 0.65    | 0.93    | 0.86   | 0.98  | 0.95    | 0.94  | 0.37     | 0.45     | 0.45    | 0.48      | 0.60    | 0.61    | 0.58    | 0.64   | 0.63     | 0.41   | 0.60     | 0.45    | 0.31    | 0.17     | 0.63     | 0.51    | 1.18   | 1.00     | 0.99    | 0.70            | 0.53      | 0.43              |
| H3K9me3                                              | 0.94     | 0.94     | 0.60    | 0.95    | 0.62    | 0.83    | 0.90   | 0.93  | 0.84    | 0.94  | 0.23     | 0.47     | 0.39    | 0.43      | 0.56    | 0.40    | 0.54    | 0.76   | 0.53     | 0.41   | 0.47     | 0.40    | 0.21    | 0.05     | 0.17     | 0.24    | 0.98   | 1.00     | 0.90    | 0.59            | 0.42      | 0.31              |
| H3K27ac                                              | 0.98     | 0.97     | 0.87    | 0.97    | 0.96    | 0.93    | 1.02   | 0.96  | 0.96    | 0.96  | 0.43     | 0.73     | 0.67    | 0.87      | 0.72    | 0.67    | 0.73    | 0.63   | 0.74     | 0.55   | 0.67     | 0.62    | 0.49    | 0.49     | 0.99     | 0.90    | 1.00   | 0.24     | 1.01    | 0.90            | 0.79      | 0.73              |
| H3K9ac                                               | 0.98     | 0.95     | 0.68    | 0.98    | 0.97    | 0.73    | 0.92   | 0.94  | 0.93    | 0.87  | 0.44     | 0.53     | 0.50    | 0.56      | 0.65    | 0.67    | 0.67    | 0.54   | 0.67     | 0.43   | 0.62     | 0.48    | 0.46    | 0.31     | 0.83     | 0.67    | 0.82   | 0.99     | 1.00    | 0.73            | 0.62      | 0.44              |
| DNase                                                | 1.00     | 1.00     | 0.96    | 0.96    | 0.76    | 0.86    | 0.98   | 0.92  | 0.98    | 0.97  | 0.38     | 0.57     | 0.55    | 0.58      | 0.66    | 0.63    | 0.68    | 0.68   | 0.59     | 0.76   | 0.76     | 0.67    | 0.61    | 0.51     | 0.34     | 0.91    | 1.00   | 1.00     | 0.74    | 0.58            | 0.47      | 0.45              |
| H3K4me2                                              | 1.00     | 0.96     | 0.75    | 1.00    | 0.98    | 0.73    | 0.96   | 0.93  | 0.97    | 0.90  | 0.50     | 0.56     | 0.49    | 0.54      | 0.64    | 0.66    | 0.63    | 0.67   | 0.46     | 0.62   | 0.49     | 0.33    | 0.30    | 0.33     | 0.70     | 0.62    | 1.00   | 0.99     | 1.00    | 0.74            | 0.58      | 0.43              |
| H2A.Z                                                | 0.86     | 0.93     | 0.62    | 0.94    | 0.87    | 0.57    | 0.84   | 0.73  | 0.91    | 0.73  | 0.29     | 0.47     | 0.45    | 0.48      | 0.58    | 0.49    | 0.55    | 0.69   | 0.41     | 0.62   | 0.47     | 0.24    | 0.17    | 0.44     | 0.44     | 0.22    | 0.97   | 0.98     | 0.62    | 0.49            | 0.62      | 0.49              |
| H3K79me2                                             | 0.95     | 0.92     | 0.52    | 0.95    | 0.57    | 0.85    | 0.82   | 0.89  | 0.73    | 1.03  | 0.40     | 0.28     | 0.35    | 0.46      | 0.54    | 0.41    | 0.98    | 0.49   | 0.25     | 0.41   | 0.26     | 0.21    | 0.12    | 0.33     | 0.28     | 1.01    | 1.00   | 0.98     | 0.77    | 0.60            | 0.39      | 0.39              |
| H4K20me1                                             | 0.78     | 0.87     | 0.35    | 0.92    | 0.72    | 0.42    | 0.72   | 0.62  | 0.85    | 0.60  | 0.84     | 0.29     | 0.14    | 0.24      | 0.30    | 0.33    | 0.16    | 0.66   | 0.18     | 0.18   | 0.24     | 0.17    | 0.14    | 0.09     | 0.32     | 0.25    | 0.34   | 0.94     | 0.47    | 0.26            | 0.26      | 0.26              |
| H2AK5ac                                              | 0.99     | 0.98     | 0.96    | 0.99    | 0.96    | 0.79    | 0.97   | 0.99  | 0.99    | 0.99  | 0.34     | 0.57     | 0.71    | 0.74      | 0.74    | 0.74    | 0.74    | 0.74   | 0.74     | 0.74   | 0.74     | 0.74    | 0.74    | 0.74     | 0.74     | 0.74    | 0.74   | 0.74     | 0.74    | 0.74            | 0.74      | 0.74              |
| H2BK120ac                                            | 0.96     | 0.95     | 0.77    | 0.97    | 0.95    | 0.80    | 0.88   | 0.91  | 0.95    | 0.91  | 0.34     | 0.83     | 0.79    | 0.79      | 0.79    | 0.79    | 0.79    | 0.79   | 0.79     | 0.79   | 0.79     | 0.79    | 0.79    | 0.79     | 0.79     | 0.79    | 0.79   | 0.79     | 0.79    | 0.79            | 0.79      | 0.79              |
| H2BK5ac                                              | 0.97     | 0.98     | 0.86    | 0.97    | 0.97    | 0.98    | 0.90   | 0.97  | 0.96    | 0.93  | 0.40     | 0.86     | 0.77    | 0.79      | 0.75    | 0.82    | 0.73    | 0.80   | 0.66     | 0.76   | 0.73     | 0.65    | 0.63    | 0.93     | 0.82     | 0.29    | 1.00   | 0.99     | 0.83    | 0.80            | 0.80      | 0.80              |
| H3K18ac                                              | 0.97     | 0.96     | 0.82    | 0.97    | 0.97    | 0.83    | 0.90   | 0.96  | 0.97    | 0.92  | 0.87     | 0.33     | 0.83    | 0.88      | 0.81    | 0.86    | 0.10    | 0.60   | 0.93     | 0.83   | 0.93     | 0.86    | 0.80    | 0.87     | 0.91     | 0.52    | 0.99   | 1.00     | 0.99    | 0.87            | 0.88      | 0.88              |
| H3K23ac                                              | 0.94     | 0.93     | 0.67    | 0.96    | 0.96    | 0.66    | 0.90   | 0.89  | 0.93    | 0.88  | 0.93     | 0.48     | 0.58    | 0.49      | 0.52    | 0.65    | 0.68    | 0.78   | 0.70     | 0.49   | 0.61     | 0.51    | 0.56    | 0.45     | 0.85     | 0.86    | 0.28   | 0.99     | 0.99    | 0.73            | 0.64      | 0.64              |
| H3K79me1                                             | 0.93     | 0.93     | 0.69    | 0.97    | 0.97    | 0.69    | 0.94   | 0.90  | 0.90    | 0.90  | 0.30     | 0.77     | 0.81    | 0.70      | 0.84    | 0.76    | 0.76    | 0.76   | 0.76     | 0.76   | 0.76     | 0.76    | 0.76    | 0.76     | 0.76     | 0.76    | 0.76   | 0.76     | 0.76    | 0.76            | 0.76      | 0.76              |
| H4K8ac                                               | 0.91     | 0.91     | 0.69    | 0.97    | 0.97    | 0.69    | 0.94   | 0.90  | 0.90    | 0.90  | 0.30     | 0.77     | 0.81    | 0.70      | 0.84    | 0.76    | 0.76    | 0.76   | 0.76     | 0.76   | 0.76     | 0.76    | 0.76    | 0.76     | 0.76     | 0.76    | 0.76   | 0.76     | 0.76    | 0.76            | 0.76      | 0.76              |
| H2BK12ac                                             | 0.90     | 0.99     | 0.86    | 0.96    | 0.93    | 0.73    | 0.81   | 1.01  | 0.95    | 0.90  | 0.76     | 0.30     | 0.93    | 0.88      | 0.73    | 0.87    | 0.73    | 0.88   | 0.69     | 0.71   | 0.80     | 0.79    | 0.61    | 0.48     | 0.92     | 0.83    | 0.25   | 0.99     | 1.00    | 0.80            | 0.77      | 0.77              |
| H3K14ac                                              | 0.84     | 0.99     | 0.77    | 0.96    | 0.91    | 0.69    | 0.85   | 0.82  | 0.94    | 0.83  | 0.36     | 0.80     | 0.77    | 0.72      | 0.81    | 0.89    | 0.88    | 0.78   | 0.88     | 0.73   | 0.80     | 0.69    | 0.63    | 0.76     | 0.65     | 0.44    | 0.98   | 0.97     | 0.80    | 0.79            | 0.80      | 0.80              |
| H4K91ac                                              | 0.98     | 0.98     | 0.83    | 0.96    | 0.91    | 0.77    | 0.83   | 0.91  | 0.99    | 0.99  | 0.77     | 0.33     | 0.85    | 0.90      | 0.81    | 0.85    | 0.77    | 0.94   | 0.71     | 0.92   | 0.86     | 0.85    | 0.70    | 0.85     | 0.78     | 0.82    | 0.26   | 0.99     | 0.98    | 0.83            | 0.85      | 0.85              |
| H2BK15ac                                             | 0.96     | 0.96     | 0.65    | 0.96    | 0.96    | 0.65    | 0.96   | 0.96  | 0.96    | 0.96  | 0.34     | 0.57     | 0.58    | 0.69      | 0.71    | 0.71    | 0.71    | 0.71   | 0.71     | 0.71   | 0.71     | 0.71    | 0.71    | 0.71     | 0.71     | 0.71    | 0.71   | 0.71     | 0.71    | 0.71            | 0.71      | 0.71              |
| H2BK20ac                                             | 0.69     | 0.83     | 0.54    | 0.94    | 0.79    | 0.58    | 0.74   | 0.51  | 0.88    | 0.60  | 0.76     | 0.36     | 0.70    | 0.91      | 0.58    | 0.68    | 0.58    | 0.76   | 0.66     | 0.49   | 0.79     | 0.64    | 0.70    | 0.65     | 0.59     | 0.15    | 0.94   | 0.69     | 0.70    | 0.70            | 0.70      | 0.70              |
| H3K56ac                                              | 0.73     | 0.88     | 0.41    | 0.91    | 0.74    | 0.66    | 0.81   | 0.79  | 0.82    | 0.70  | 0.39     | 0.52     | 0.54    | 0.65      | 0.55    | 0.84    | 0.62    | 0.61   | 0.78     | 0.44   | 0.63     | 0.59    | 0.50    | 0.47     | 0.73     | 0.71    | 0.91   | 0.67     | 0.64    | 0.64            | 0.64      | 0.64              |
| H4K5ac                                               | 0.72     | 0.85     | 0.61    | 0.92    | 0.76    | 0.93    | 0.84   | 0.63  | 0.86    | 0.82  | 0.82     | 0.31     | 0.67    | 0.72      | 0.81    | 0.78    | 0.84    | 0.78   | 0.65     | 0.92   | 0.       |         |         |          |          |         |        |          |         |                 |           |                   |

a

| State       | All other Marks |          |         |           |         |          |        |        |        |         |         |         |         |          |         |          |        |         |         |       |       |         |         |          |          |          |         |          |    |    |
|-------------|-----------------|----------|---------|-----------|---------|----------|--------|--------|--------|---------|---------|---------|---------|----------|---------|----------|--------|---------|---------|-------|-------|---------|---------|----------|----------|----------|---------|----------|----|----|
|             | H2BK15ac        | H2BK20ac | H2BK5ac | H2BK120ac | H4K91ac | H2BK12ac | H3K4ac | H4K8ac | H4K5ac | H3K36ac | H2BK5ac | H3K56ac | H3K23ac | H3K23me2 | H3K9me1 | H3K79me1 | H3K9ac | H3K4me2 | H3K4me3 | H2A.Z | DNase | H3K27ac | H3K4me1 | H3K79me2 | H4K20me1 | H3K36me3 | H3K9me3 | H3K27me3 |    |    |
| 1_TssA      | 0               | 0        | 0       | 0         | 0       | 0        | 0      | 0      | 0      | 0       | 0       | 0       | 0       | 0        | 0       | 0        | 0      | 0       | 0       | 0     | 0     | 0       | 0       | 0        | 0        | 0        | 0       | 0        | 0  |    |
| 2_PromU     | 2               | 24       | 18      | 90        | 91      | 64       | 98     | 88     | 99     | 100     | 100     | 87      | 57      | 30       | 51      | 0        | 6      | 100     | 100     | 100   | 96    | 96      | 99      | 53       | 2        | 0        | 0       | 0        | 0  |    |
| 3_PromD1    | 7               | 0        | 0       | 1         | 6       | 14       | 4      | 61     | 65     | 86      | 76      | 90      | 36      | 46       | 15      | 58       | 0      | 31      | 100     | 100   | 91    | 89      | 100     | 35       | 99       | 8        | 2       | 0        | 5  |    |
| 4_PromD2    | 10              | 0        | 0       | 0         | 0       | 0        | 0      | 8      | 0      | 0       | 0       | 0       | 0       | 0        | 0       | 0        | 0      | 0       | 0       | 0     | 0     | 0       | 0       | 0        | 0        | 0        | 0       | 0        | 0  |    |
| 5_Tss       | 12              | 0        | 0       | 0         | 0       | 0        | 0      | 1      | 0      | 0       | 0       | 0       | 0       | 0        | 0       | 0        | 0      | 0       | 0       | 0     | 0     | 0       | 0       | 0        | 0        | 0        | 0       | 0        | 0  |    |
| 6_Tx        | 13              | 0        | 0       | 0         | 0       | 0        | 0      | 15     | 0      | 0       | 0       | 1       | 1       | 0        | 0       | 0        | 0      | 0       | 0       | 0     | 0     | 0       | 0       | 0        | 0        | 0        | 0       | 0        | 0  |    |
| 7_Tss       | 15              | 0        | 0       | 0         | 0       | 0        | 0      | 0      | 0      | 0       | 0       | 0       | 0       | 0        | 0       | 0        | 0      | 0       | 0       | 0     | 0     | 0       | 0       | 0        | 0        | 0        | 0       | 0        | 0  |    |
| 8_TxWk      | 16              | 0        | 0       | 0         | 0       | 0        | 0      | 0      | 0      | 0       | 0       | 0       | 0       | 0        | 0       | 0        | 0      | 0       | 0       | 0     | 0     | 0       | 0       | 0        | 0        | 0        | 0       | 0        | 0  |    |
| 9_TxReg     | 19              | 61       | 72      | 94        | 97      | 99       | 97     | 100    | 93     | 98      | 99      | 100     | 94      | 69       | 53      | 68       | 4      | 92      | 97      | 98    | 68    | 14      | 82      | 100      | 98       | 47       | 28      | 0        | 0  | 4  |
| 10_TxEnh5'  | 21              | 52       | 75      | 94        | 97      | 100      | 99     | 100    | 75     | 87      | 94      | 100     | 77      | 26       | 20      | 28       | 1      | 86      | 12      | 35    | 2     | 25      | 79      | 91       | 91       | 27       | 31      | 1        | 1  |    |
| 11_TxEnh3'  | 22              | 0        | 0       | 0         | 0       | 0        | 0      | 0      | 0      | 0       | 0       | 0       | 0       | 0        | 0       | 0        | 0      | 0       | 0       | 0     | 0     | 0       | 0       | 0        | 0        | 0        | 0       | 0        | 0  |    |
| 12_TxEnhW   | 25              | 0        | 0       | 0         | 0       | 0        | 0      | 0      | 0      | 0       | 0       | 0       | 0       | 0        | 0       | 0        | 0      | 0       | 0       | 0     | 0     | 0       | 0       | 0        | 0        | 0        | 0       | 0        | 0  |    |
| 13_EnhA1    | 27              | 5        | 40      | 51        | 84      | 88       | 88     | 83     | 50     | 69      | 97      | 92      | 86      | 19       | 2       | 18       | 0      | 5       | 76      | 86    | 36    | 46      | 86      | 100      | 12       | 1        | 3       | 0        | 1  |    |
| 15_EnhAF    | 30              | 0        | 0       | 0         | 0       | 0        | 0      | 0      | 0      | 0       | 0       | 0       | 0       | 0        | 0       | 0        | 0      | 0       | 0       | 0     | 0     | 0       | 0       | 0        | 0        | 0        | 0       | 0        | 0  |    |
| 16_EnhW1    | 33              | 0        | 0       | 0         | 0       | 0        | 0      | 0      | 0      | 0       | 0       | 0       | 0       | 0        | 0       | 0        | 0      | 0       | 0       | 0     | 0     | 0       | 0       | 0        | 0        | 0        | 0       | 0        | 0  |    |
| 17_EnhW2    | 35              | 0        | 0       | 0         | 0       | 0        | 0      | 0      | 0      | 0       | 0       | 0       | 0       | 0        | 0       | 0        | 0      | 0       | 0       | 0     | 0     | 0       | 0       | 0        | 0        | 0        | 0       | 0        | 0  |    |
| 18_EnhAc    | 37              | 0        | 0       | 0         | 0       | 0        | 0      | 0      | 0      | 0       | 0       | 0       | 0       | 0        | 0       | 0        | 0      | 0       | 0       | 0     | 0     | 0       | 0       | 0        | 0        | 0        | 0       | 0        | 0  |    |
| 19_DNase    | 41              | 0        | 0       | 0         | 0       | 0        | 0      | 0      | 0      | 0       | 0       | 0       | 0       | 0        | 0       | 0        | 0      | 0       | 0       | 0     | 0     | 0       | 0       | 0        | 0        | 0        | 0       | 0        | 0  |    |
| 20_ZNF/Rpts | 42              | 0        | 0       | 0         | 0       | 0        | 0      | 0      | 0      | 0       | 0       | 0       | 0       | 0        | 0       | 0        | 0      | 0       | 0       | 0     | 0     | 0       | 0       | 0        | 0        | 0        | 0       | 0        | 0  |    |
| 21_Het      | 44              | 0        | 0       | 0         | 0       | 0        | 0      | 0      | 0      | 0       | 0       | 0       | 0       | 0        | 0       | 0        | 0      | 0       | 0       | 0     | 0     | 0       | 0       | 0        | 0        | 0        | 0       | 0        | 0  |    |
| 22_PromP    | 45              | 0        | 0       | 0         | 0       | 0        | 0      | 0      | 0      | 0       | 0       | 0       | 0       | 0        | 0       | 0        | 0      | 0       | 0       | 0     | 0     | 0       | 0       | 0        | 0        | 0        | 0       | 0        | 0  |    |
| 23_PromBiv  | 46              | 0        | 0       | 0         | 0       | 0        | 0      | 0      | 0      | 0       | 0       | 0       | 0       | 0        | 0       | 0        | 0      | 0       | 0       | 0     | 0     | 0       | 0       | 0        | 0        | 0        | 0       | 0        | 0  |    |
| 24_ReprPC   | 49              | 0        | 0       | 0         | 0       | 0        | 0      | 0      | 0      | 0       | 0       | 0       | 0       | 0        | 0       | 0        | 0      | 0       | 0       | 0     | 0     | 0       | 0       | 0        | 0        | 0        | 0       | 0        | 0  |    |
| 25_Quies    | 50              | 0        | 0       | 0         | 0       | 0        | 0      | 0      | 0      | 0       | 0       | 0       | 0       | 0        | 0       | 0        | 0      | 0       | 0       | 0     | 0     | 0       | 0       | 0        | 0        | 0        | 0       | 0        | 0  |    |
| min         |                 | 0        | 0       | 9         | 14      | 15       | 18     | 31     | 38     | 44      | 56      | 59      | 69      | 79       | 80      | 86       | 86     | 87      | 87      | 89    | 89    | 90      | 92      | 93       | 93       | 93       | 93      | 93       | 93 |    |
| average     |                 | 92       | 95      | 88        | 85      | 92       | 92     | 95     | 88     | 95      | 96      | 95      | 95      | 96       | 97      | 98       | 97     | 98      | 97      | 98    | 98    | 98      | 98      | 98       | 98       | 98       | 98      | 98       | 98 | 98 |

b

| State       | Tier 1 and Tier 2 + mark |           |          |            |           |         |         |           |         |          |          |           |          |          |           |          |     |   |
|-------------|--------------------------|-----------|----------|------------|-----------|---------|---------|-----------|---------|----------|----------|-----------|----------|----------|-----------|----------|-----|---|
|             | +H3K18ac                 | +H2BK12ac | +H4K91ac | +H2BK120ac | +H2BK20ac | +H3K4ac | +H4K5ac | +H2BK15ac | +H4K8ac | +H2BK5ac | +H3K14ac | +H3K23me2 | +H3K23ac | +H3K56ac | +H3K79me1 | +H3K9me1 |     |   |
| 1_TssA      | 69                       | 87        | 74       | 73         | 71        | 68      | 83      | 70        | 76      | 67       | 80       | 76        | 83       | 74       | 72        | 76       | 69  |   |
| 2_PromU     | 20                       | 87        | 74       | 73         | 71        | 68      | 83      | 70        | 76      | 67       | 80       | 76        | 83       | 74       | 72        | 76       | 69  |   |
| 3_PromD1    | 21                       | 45        | 30       | 33         | 29        | 21      | 27      | 39        | 26      | 39       | 19       | 23        | 28       | 28       | 24        | 26       | 21  |   |
| 4_PromD2    | 9                        | 48        | 44       | 50         | 43        | 23      | 21      | 27        | 36      | 14       | 18       | 41        | 18       | 41       | 9         | 20       | 13  | 9 |
| 5_Tss       | 93                       | 94        | 94       | 94         | 94        | 94      | 93      | 93        | 93      | 93       | 93       | 93        | 93       | 93       | 93        | 93       | 93  |   |
| 6_Tx        | 90                       | 91        | 90       | 91         | 90        | 92      | 90      | 90        | 90      | 90       | 90       | 90        | 90       | 90       | 90        | 90       | 90  |   |
| 7_Tss       | 92                       | 93        | 93       | 92         | 92        | 94      | 92      | 92        | 92      | 92       | 92       | 92        | 92       | 92       | 92        | 92       | 92  |   |
| 8_TxWk      | 100                      | 100       | 100      | 100        | 100       | 100     | 100     | 100       | 100     | 100      | 100      | 100       | 100      | 100      | 100       | 100      | 100 |   |
| 9_TxReg     | 99                       | 99        | 99       | 99         | 99        | 99      | 99      | 99        | 99      | 99       | 99       | 99        | 99       | 99       | 99        | 99       | 99  |   |
| 10_TxEnh5'  | 94                       | 95        | 94       | 94         | 94        | 94      | 94      | 94        | 94      | 94       | 94       | 94        | 94       | 94       | 94        | 94       | 94  |   |
| 11_TxEnh3'  | 89                       | 92        | 92       | 91         | 91        | 91      | 92      | 91        | 91      | 91       | 91       | 91        | 91       | 91       | 91        | 91       | 91  |   |
| 12_TxEnhW   | 85                       | 90        | 90       | 89         | 88        | 90      | 89      | 89        | 88      | 88       | 88       | 88        | 88       | 88       | 88        | 88       | 88  |   |
| 13_EnhA1    | 93                       | 93        | 93       | 93         | 93        | 93      | 93      | 93        | 93      | 93       | 93       | 93        | 93       | 93       | 93        | 93       | 93  |   |
| 15_EnhAF    | 18                       | 47        | 50       | 49         | 46        | 26      | 45      | 33        | 26      | 38       | 28       | 20        | 22       | 49       | 21        | 18       | 18  |   |
| 16_EnhW1    | 44                       | 58        | 71       | 72         | 66        | 72      | 69      | 63        | 57      | 69       | 52       | 68        | 50       | 54       | 59        | 54       | 44  |   |
| 17_EnhW2    | 52                       | 54        | 56       | 58         | 58        | 58      | 58      | 58        | 58      | 58       | 58       | 58        | 58       | 58       | 58        | 58       | 58  |   |
| 18_EnhAc    | 85                       | 91        | 90       | 90         | 90        | 90      | 90      | 90        | 90      | 90       | 90       | 90        | 90       | 90       | 90        | 90       | 90  |   |
| 19_DNase    | 2                        | 35        | 47       | 52         | 40        | 49      | 41      | 27        | 20      | 31       | 22       | 27        | 4        | 6        | 8         | 3        | 2   |   |
| 20_ZNF/Rpts | 4                        | 34        | 22       | 17         | 13        | 13      | 13      | 18        | 7       | 11       | 11       | 9         | 5        | 5        | 5         | 4        | 4   |   |
| 21_Het      | 91                       | 93        | 93       | 92         | 92        | 93      | 92      | 93        | 92      | 93       | 92       | 93        | 92       | 93       | 92        | 93       | 92  |   |
| 22_PromP    | 94                       | 95        | 94       | 94         | 94        | 94      | 94      | 94        | 94      | 94       | 94       | 94        | 94       | 94       | 94        | 94       | 94  |   |
| 23_PromBiv  | 91                       | 93        | 93       | 92         | 92        | 93      | 92      | 93        | 92      | 93       | 92       | 93        | 92       | 93       | 92        | 93       | 92  |   |
| 24_ReprPC   | 94                       | 95        | 94       | 94         | 94        | 94      | 94      | 94        | 94      | 94       | 94       | 94        | 94       | 94       | 94        | 94       | 94  |   |
| 25_Quies    | 99                       | 99        | 99       | 99         | 99        | 99      | 99      | 99        | 99      | 99       | 99       | 99        | 99       | 99       | 99        | 99       | 99  |   |
| min         | 0                        | 31        | 22       | 17         | 12        | 11      | 10      | 9         | 5       | 5        | 4        | 3         | 2        | 1        | 1         | 1        | 1   |   |
| average     | 65                       | 77        | 77       | 77         | 74        | 76      | 75      | 74        | 72      | 75       | 73       | 74        | 67       | 69       | 70        | 69       | 65  |   |



C

|             | State | H2BK15ac | H2BK20ac | H2AK5ac | H2BK120ac | H4K91ac | H2BK12ac | H3K4ac | H4K8ac | H4K5ac | H3K18ac | H2BK5ac | H3K56ac | H3K23ac | H3K3me2 | H3K9me1 | H3K79me1 | H3K9ac | H3K4me2 | H3K4me3 | H2A.Z | DNase | H3K27ac | H3K4me1 | H3K79me2 | H4K20me1 | H3K36me3 | H3K9me3 | H3K27me3 |   |
|-------------|-------|----------|----------|---------|-----------|---------|----------|--------|--------|--------|---------|---------|---------|---------|---------|---------|----------|--------|---------|---------|-------|-------|---------|---------|----------|----------|----------|---------|----------|---|
| 1_TssA      | 1     | 0        | 0        | 0       | 0         | 0       | 1        | 2      | 15     | 18     | 9       | 1       | 1       | 0       | 13      | 0       | 0        | 99     | 99      | 100     | 82    | 97    | 96      | 1       | 32       | 0        | 0        | 0       | 0        |   |
| 2_PromU     | 4     | 3        | 0        | 0       | 0         | 4       | 9        | 0      | 0      | 8      | 8       | 4       | 0       | 0       | 27      | 0       | 0        | 99     | 100     | 100     | 98    | 93    | 99      | 60      | 12       | 0        | 0        | 0       | 1        |   |
| 3_PromD1    | 7     | 0        | 0        | 0       | 0         | 0       | 0        | 0      | 0      | 0      | 0       | 0       | 0       | 0       | 0       | 0       | 0        | 99     | 100     | 100     | 98    | 93    | 99      | 60      | 12       | 0        | 0        | 0       | 1        |   |
| 4_PromD2    | 10    | 0        | 0        | 0       | 0         | 0       | 0        | 0      | 0      | 0      | 0       | 0       | 0       | 0       | 0       | 0       | 0        | 99     | 100     | 100     | 98    | 93    | 99      | 60      | 12       | 0        | 0        | 0       | 1        |   |
| 5_Tss       | 12    | 0        | 0        | 0       | 0         | 0       | 0        | 0      | 0      | 0      | 0       | 0       | 0       | 0       | 0       | 0       | 0        | 99     | 100     | 100     | 98    | 93    | 99      | 60      | 12       | 0        | 0        | 0       | 1        |   |
| 6_Tx        | 13    | 0        | 0        | 0       | 0         | 0       | 0        | 0      | 0      | 0      | 0       | 0       | 0       | 0       | 0       | 0       | 0        | 99     | 100     | 100     | 98    | 93    | 99      | 60      | 12       | 0        | 0        | 0       | 1        |   |
| 7_Tss       | 14    | 0        | 0        | 0       | 0         | 0       | 0        | 0      | 0      | 0      | 0       | 0       | 0       | 0       | 0       | 0       | 0        | 99     | 100     | 100     | 98    | 93    | 99      | 60      | 12       | 0        | 0        | 0       | 1        |   |
| 8_TssWk     | 16    | 0        | 0        | 0       | 0         | 0       | 0        | 0      | 0      | 0      | 0       | 0       | 0       | 0       | 0       | 0       | 0        | 99     | 100     | 100     | 98    | 93    | 99      | 60      | 12       | 0        | 0        | 0       | 1        |   |
| 9_TxReg     | 19    | 61       | 72       | 94      | 97        | 99      | 97       | 100    | 93     | 98     | 99      | 100     | 94      | 69      | 53      | 68      | 4        | 92     | 97      | 98      | 68    | 14    | 82      | 100     | 98       | 47       | 28       | 0       | 4        |   |
| 10_TxEnh5'  | 21    | 52       | 75       | 94      | 97        | 100     | 99       | 100    | 75     | 87     | 94      | 100     | 77      | 26      | 20      | 28      | 1        | 86     | 12      | 35      | 2     | 1     | 25      | 79      | 91       | 91       | 27       | 31      | 1        | 1 |
| 11_TxEnh3'  | 23    | 0        | 0        | 0       | 0         | 0       | 0        | 0      | 0      | 0      | 0       | 0       | 0       | 0       | 0       | 0       | 0        | 99     | 100     | 100     | 98    | 93    | 99      | 60      | 12       | 0        | 0        | 0       | 1        |   |
| 12_TxEnhW   | 25    | 0        | 0        | 0       | 0         | 0       | 0        | 0      | 0      | 0      | 0       | 0       | 0       | 0       | 0       | 0       | 0        | 99     | 100     | 100     | 98    | 93    | 99      | 60      | 12       | 0        | 0        | 0       | 1        |   |
| 13_EnhA1    | 27    | 5        | 40       | 51      | 84        | 88      | 88       | 83     | 50     | 69     | 97      | 99      | 86      | 19      | 2       | 18      | 0        | 5      | 76      | 86      | 36    | 46    | 86      | 100     | 100      | 12       | 1        | 3       | 0        | 1 |
| 15_EnhAF    | 30    | 0        | 0        | 0       | 0         | 0       | 0        | 0      | 0      | 0      | 0       | 0       | 0       | 0       | 0       | 0       | 0        | 99     | 100     | 100     | 98    | 93    | 99      | 60      | 12       | 0        | 0        | 0       | 1        |   |
| 16_EnhW1    | 33    | 0        | 0        | 0       | 0         | 0       | 0        | 0      | 0      | 0      | 0       | 0       | 0       | 0       | 0       | 0       | 0        | 99     | 100     | 100     | 98    | 93    | 99      | 60      | 12       | 0        | 0        | 0       | 1        |   |
| 17_EnhW2    | 35    | 0        | 0        | 0       | 0         | 0       | 0        | 0      | 0      | 0      | 0       | 0       | 0       | 0       | 0       | 0       | 0        | 99     | 100     | 100     | 98    | 93    | 99      | 60      | 12       | 0        | 0        | 0       | 1        |   |
| 18_EnhAc    | 37    | 0        | 0        | 0       | 0         | 0       | 0        | 0      | 0      | 0      | 0       | 0       | 0       | 0       | 0       | 0       | 0        | 99     | 100     | 100     | 98    | 93    | 99      | 60      | 12       | 0        | 0        | 0       | 1        |   |
| 19_DNase    | 41    | 0        | 0        | 0       | 0         | 0       | 0        | 0      | 0      | 0      | 0       | 0       | 0       | 0       | 0       | 0       | 0        | 99     | 100     | 100     | 98    | 93    | 99      | 60      | 12       | 0        | 0        | 0       | 1        |   |
| 20_ZNF/Rp1s | 42    | 0        | 0        | 0       | 0         | 0       | 0        | 0      | 0      | 0      | 0       | 0       | 0       | 0       | 0       | 0       | 0        | 99     | 100     | 100     | 98    | 93    | 99      | 60      | 12       | 0        | 0        | 0       | 1        |   |
| 21_Het      | 44    | 0        | 0        | 0       | 0         | 0       | 0        | 0      | 0      | 0      | 0       | 0       | 0       | 0       | 0       | 0       | 0        | 99     | 100     | 100     | 98    | 93    | 99      | 60      | 12       | 0        | 0        | 0       | 1        |   |
| 22_PromP    | 45    | 0        | 0        | 0       | 0         | 0       | 0        | 0      | 0      | 0      | 0       | 0       | 0       | 0       | 0       | 0       | 0        | 99     | 100     | 100     | 98    | 93    | 99      | 60      | 12       | 0        | 0        | 0       | 1        |   |
| 23_PromBiv  | 46    | 0        | 0        | 0       | 0         | 0       | 0        | 0      | 0      | 0      | 0       | 0       | 0       | 0       | 0       | 0       | 0        | 99     | 100     | 100     | 98    | 93    | 99      | 60      | 12       | 0        | 0        | 0       | 1        |   |
| 24_ResPC    | 49    | 0        | 0        | 0       | 0         | 0       | 0        | 0      | 0      | 0      | 0       | 0       | 0       | 0       | 0       | 0       | 0        | 99     | 100     | 100     | 98    | 93    | 99      | 60      | 12       | 0        | 0        | 0       | 1        |   |
| 25_Quies    | 50    | 0        | 0        | 0       | 0         | 0       | 0        | 0      | 0      | 0      | 0       | 0       | 0       | 0       | 0       | 0       | 0        | 99     | 100     | 100     | 98    | 93    | 99      | 60      | 12       | 0        | 0        | 0       | 1        |   |

|         |  | Core + mark |         |        |          |         |         |        |        |        |         |         |         |         |         |          |        |         |         |       |       |         |         |          |          |          |         |          |   |
|---------|--|-------------|---------|--------|----------|---------|---------|--------|--------|--------|---------|---------|---------|---------|---------|----------|--------|---------|---------|-------|-------|---------|---------|----------|----------|----------|---------|----------|---|
|         |  | H3K15ac     | H3K20ac | H3K5ac | H3K120ac | H4K91ac | H3K12ac | H3K4ac | H4K8ac | H4K5ac | H3K18ac | H3K56ac | H3K23ac | H3K3me2 | H3K9me1 | H3K79me1 | H3K9ac | H3K4me2 | H3K4me3 | H2A.Z | DNase | H3K27ac | H3K4me1 | H3K79me2 | H4K20me1 | H3K36me3 | H3K9me3 | H3K27me3 |   |
| min     |  | 0           | 0       | 0      | 0        | 0       | 0       | 0      | 0      | 0      | 0       | 0       | 0       | 0       | 0       | 0        | 0      | 0       | 0       | 0     | 0     | 0       | 0       | 0        | 0        | 0        | 0       | 0        | 0 |
| average |  | 31          | 43      | 42     | 42       | 42      | 41      | 41     | 41     | 41     | 41      | 40      | 40      | 40      | 39      | 38       | 38     | 38      | 38      | 38    | 37    | 36      | 36      | 35       | 34       | 34       | 31      |          |   |

d

|             | State | H2BK15ac | H2BK20ac | H2AK5ac | H2BK120ac | H4K91ac | H2BK12ac | H3K4ac | H4K8ac | H4K5ac | H3K18ac | H2BK5ac | H3K56ac | H3K23ac | H3K3me2 | H3K9me1 | H3K79me1 | H3K9ac | H3K4me2 | H3K4me3 | H2A.Z | DNase | H3K27ac | H3K4me1 | H3K79me2 | H4K20me1 | H3K36me3 | H3K9me3 | H3K27me3 |   |
|-------------|-------|----------|----------|---------|-----------|---------|----------|--------|--------|--------|---------|---------|---------|---------|---------|---------|----------|--------|---------|---------|-------|-------|---------|---------|----------|----------|----------|---------|----------|---|
| 1_TssA      | 1     | 0        | 0        | 0       | 0         | 0       | 0        | 1      | 2      | 15     | 18      | 9       | 1       | 1       | 0       | 13      | 0        | 0      | 99      | 99      | 100   | 82    | 97      | 96      | 1        | 32       | 0        | 0       | 0        | 0 |
| 2_PromU     | 4     | 3        | 0        | 0       | 0         | 0       | 0        | 0      | 0      | 8      | 8       | 4       | 0       | 0       | 27      | 0       | 0        | 99     | 100     | 100     | 98    | 93    | 99      | 60      | 12       | 0        | 0        | 0       | 1        |   |
| 3_PromD1    | 7     | 0        | 0        | 0       | 0         | 0       | 0        | 0      | 0      | 0      | 0       | 0       | 0       | 0       | 0       | 0       | 0        | 99     | 100     | 100     | 98    | 93    | 99      | 60      | 12       | 0        | 0        | 0       | 1        |   |
| 4_PromD2    | 10    | 0        | 0        | 0       | 0         | 0       | 0        | 0      | 0      | 0      | 0       | 0       | 0       | 0       | 0       | 0       | 0        | 99     | 100     | 100     | 98    | 93    | 99      | 60      | 12       | 0        | 0        | 0       | 1        |   |
| 5_Tss       | 12    | 0        | 0        | 0       | 0         | 0       | 0        | 0      | 0      | 0      | 0       | 0       | 0       | 0       | 0       | 0       | 0        | 99     | 100     | 100     | 98    | 93    | 99      | 60      | 12       | 0        | 0        | 0       | 1        |   |
| 6_Tx        | 13    | 0        | 0        | 0       | 0         | 0       | 0        | 0      | 0      | 0      | 0       | 0       | 0       | 0       | 0       | 0       | 0        | 99     | 100     | 100     | 98    | 93    | 99      | 60      | 12       | 0        | 0        | 0       | 1        |   |
| 7_Tss       | 14    | 0        | 0        | 0       | 0         | 0       | 0        | 0      | 0      | 0      | 0       | 0       | 0       | 0       | 0       | 0       | 0        | 99     | 100     | 100     | 98    | 93    | 99      | 60      | 12       | 0        | 0        | 0       | 1        |   |
| 8_TssWk     | 16    | 0        | 0        | 0       | 0         | 0       | 0        | 0      | 0      | 0      | 0       | 0       | 0       | 0       | 0       | 0       | 0        | 99     | 100     | 100     | 98    | 93    | 99      | 60      | 12       | 0        | 0        | 0       | 1        |   |
| 9_TxReg     | 19    | 61       | 72       | 94      | 97        | 99      | 97       | 100    | 93     | 98     | 99      | 100     | 94      | 69      | 53      | 68      | 4        | 92     | 97      | 98      | 68    | 14    | 82      | 100     | 98       | 47       | 28       | 0       | 4        |   |
| 10_TxEnh5'  | 21    | 52       | 75       | 94      | 97        | 100     | 99       | 100    | 75     | 87     | 94      | 100     | 77      | 26      | 20      | 28      | 1        | 86     | 12      | 35      | 2     | 1     | 25      | 79      | 91       | 91       | 27       | 31      | 1        | 1 |
| 11_TxEnh3'  | 23    | 0        | 0        | 0       | 0         | 0       | 0        | 0      | 0      | 0      | 0       | 0       | 0       | 0       | 0       | 0       | 0        | 99     | 100     | 100     | 98    | 93    | 99      | 60      | 12       | 0        | 0        | 0       | 1        |   |
| 12_TxEnhW   | 25    | 0        | 0        | 0       | 0         | 0       | 0        | 0      | 0      | 0      | 0       | 0       | 0       | 0       | 0       | 0       | 0        | 99     | 100     | 100     | 98    | 93    | 99      | 60      | 12       | 0        | 0        | 0       | 1        |   |
| 13_EnhA1    | 27    | 5        | 40       | 51      | 84        | 88      | 88       | 83     | 50     | 69     | 97      | 99      | 86      | 19      | 2       | 18      | 0        | 5      | 76      | 86      | 36    | 46    | 86      | 100     | 100      | 12       | 1        | 3       | 0        | 1 |
| 15_EnhAF    | 30    | 0        | 0        | 0       | 0         | 0       | 0        | 0      | 0      | 0      | 0       | 0       | 0       | 0       | 0       | 0       | 0        | 99     | 100     | 100     | 98    | 93    | 99      | 60      | 12       | 0        | 0        | 0       | 1        |   |
| 16_EnhW1    | 33    | 0        | 0        | 0       | 0         | 0       | 0        | 0      | 0      | 0      | 0       | 0       | 0       | 0       | 0       | 0       | 0        | 99     | 100     | 100     | 98    | 93    | 99      | 60      | 12       | 0        | 0        | 0       | 1        |   |
| 17_EnhW2    | 35    | 0        | 0        | 0       | 0         | 0       | 0        | 0      | 0      | 0      | 0       | 0       | 0       | 0       | 0       | 0       | 0        | 99     | 100     | 100     | 98    | 93    | 99      | 60      | 12       | 0        | 0        | 0       | 1        |   |
| 18_EnhAc    | 37    | 0        | 0        | 0       | 0         | 0       | 0        | 0      | 0      | 0      | 0       | 0       | 0       | 0       | 0       | 0       | 0        | 99     | 100     | 100     | 98    | 93    | 99      | 60      | 12       | 0        | 0        | 0       | 1        |   |
| 19_DNase    | 41    | 0        | 0        | 0       | 0         | 0       | 0        | 0      | 0      | 0      | 0       | 0       | 0       | 0       | 0       | 0       | 0        | 99     | 100     | 100     | 98    | 93    | 99      | 60      | 12       | 0        | 0        | 0       | 1        |   |
| 20_ZNF/Rp1s | 42    | 0        | 0        | 0       | 0         | 0       | 0        | 0      | 0      | 0      | 0       | 0       | 0       | 0       | 0       | 0       | 0        | 99     | 100     | 100     | 98    | 93    | 99      | 60      | 12       | 0        | 0        | 0       | 1        |   |
| 21_Het      | 44    | 0        | 0        | 0       | 0         | 0       | 0        | 0      | 0      | 0      | 0       | 0       | 0       | 0       | 0       | 0       | 0        | 99     | 100     | 100     | 98    | 93    | 99      | 60      | 12       | 0        | 0        | 0       | 1        |   |
| 22_PromP    | 45    | 0        | 0        | 0       | 0         | 0       | 0        | 0      | 0      | 0      | 0       | 0       | 0       | 0       | 0       | 0       | 0        | 99     | 100     | 100     | 98    | 93    | 99      | 60      | 12       | 0        | 0        | 0       | 1        |   |
| 23_PromBiv  | 46    | 0        | 0        | 0       | 0         | 0       | 0        | 0      | 0      | 0      | 0       | 0       | 0       | 0       | 0       | 0       | 0        | 99     | 100     | 100     | 98    | 93    | 99      | 60      | 12       | 0        | 0        | 0       | 1        |   |
| 24_ResPC    | 49    | 0        | 0        | 0       | 0         | 0       | 0        | 0      | 0      | 0      | 0       | 0       | 0       | 0       | 0       | 0       | 0        | 99     | 100     | 100     | 98    | 93    | 99      | 60      | 12       | 0        | 0        | 0       | 1        |   |
| 25_Quies    | 50    | 0        | 0        | 0       | 0         | 0       | 0        | 0      | 0      | 0      | 0       | 0       | 0       | 0       | 0       | 0       | 0        | 99     | 100     | 100     | 98    | 93    | 99      | 60      | 12       | 0        | 0        | 0       | 1        |   |

|         |  | Single Mark |         |        |          |         |         |        |        |        |         |         |         |         |         |          |        |         |         |       |       |         |         |          |          |          |         |          |   |
|---------|--|-------------|---------|--------|----------|---------|---------|--------|--------|--------|---------|---------|---------|---------|---------|----------|--------|---------|---------|-------|-------|---------|---------|----------|----------|----------|---------|----------|---|
|         |  | H3K15ac     | H3K20ac | H3K5ac | H3K120ac | H4K91ac | H3K12ac | H3K4ac | H4K8ac | H4K5ac | H3K18ac | H3K56ac | H3K23ac | H3K3me2 | H3K9me1 | H3K79me1 | H3K9ac | H3K4me2 | H3K4me3 | H2A.Z | DNase | H3K27ac | H3K4me1 | H3K79me2 | H4K20me1 | H3K36me3 | H3K9me3 | H3K27me3 |   |
| min     |  | 0           | 0       | 0      | 0        | 0       | 0       | 0      | 0      | 0      | 0       | 0       | 0       | 0       | 0       | 0        | 0      | 0       | 0       | 0     | 0     | 0       | 0       | 0        | 0        | 0        | 0       | 0        | 0 |
| average |  | 7           | 7       | 7      | 7        | 6       | 6       | 6      | 6      | 6      | 6       | 6       | 6       | 6       | 5       | 5        | 5      | 5       | 5       | 5     | 5     | 5       | 5       | 5        | 4        | 4        | 2       |          |   |

### **Supplementary Figure 43: Chromatin State Recovery with Different Mark Subsets.**

**(a)** (left) The emission parameters of the same expanded mark chromatin state model on imputed data also shown in **Fig. 6d** and **Fig. S39-40**. (right) An evaluation of chromatin state recovery of this model using all marks of the model except the indicated mark of the column. Shown for each state is the percentage of locations assigned to it based on a maximum-posterior decoding for the full set of marks that would receive the same state assignment based on performing the posterior decoding with the indicated subset of marks. Along the bottom is the minimum state recovery of any state and the average state recovery. Columns are ordered by increasing minimum state recovery. **(b)** The same as **a** except showing the results for the subset of all Tier-1 and 2 marks along with this set extended by the one additional mark indicated in the column. Columns for the extended set are ordered in decreasing order of minimum state recovery. **(c)** The same as **b** except based on the core mark set of H3K4me3, H3K4me1, H3K36me3, H3K9me3, and H3K27me3 instead of the Tier-1 and 2 mark set and the columns are ordered in decreasing average state recovery. **(d)** The same as **c** except showing the chromatin state recovery with only the single mark of the column.
